# Supplementary material
Source: publisher figshare collection journal article supplement (https://aacr.figshare.com/articles/dataset/_/22651725)
Supplement: Supplementary file 1 [file 40209417]

## Supplementary Information

### Targeting RET solvent-front mutants with alkynyl nicotinamide-based inhibitors

Ujjwol Khatri<sup>1,2#</sup>, Neetu Dayal<sup>3#</sup>, Xueqing Hu<sup>1,2#</sup>, Elizabeth Larocque<sup>3</sup>, Nimishetti Naganna<sup>3</sup>, Tao Shen<sup>1,2</sup>, Xuan Liu<sup>1,2</sup>, Frederick W. Holtsberg<sup>4</sup>, M. Javad Aman<sup>4</sup>, Herman O. Sintim<sup>3,5\*</sup>, Jie Wu<sup>1,2,\*</sup>

<sup>1</sup>Department of Pathology, University of Oklahoma Health Sciences Center, Oklahoma City, OK 73104, USA

<sup>2</sup>Peggy and Charles Stephenson Cancer Center, University of Oklahoma Health Sciences Center, Oklahoma City, OK 73104, USA

<sup>3</sup>Department of Chemistry and Center for Drug Discovery, Purdue University, West Lafayette, IN 47907, USA

<sup>4</sup>KinaRx, Inc, 4 Research Court, Suite 350, Rockville, MD 20850, USA

Purdue Center for Cancer Research, Purdue University, West Lafayette, IN 47907, USA

#Equal contributing authors.

\*Correspondence to: Herman Sintim, Department of Chemistry and Center for Drug Discovery, Purdue University, Room 123, 720 Clinic Drive, West Lafayette, IN 47907-2112, USA, Tel. 765-496-6078 email: [hsintim@purdue.edu](mailto:hsintim@purdue.edu), or Jie Wu, University of Oklahoma Health Sciences Center, 975 NE 10<sup>th</sup> Street, BRC413, Oklahoma City, OK 73104, USA, Tel. 405-271-8001 ext. 31092, email: [jie-wu@ouhsc.edu](mailto:jie-wu@ouhsc.edu)

**Table of contents:**

General Procedure for Sonogashira Coupling.....S-3

References.....S-23

Supplementary Table S1. HPLC Purity .....S-25

Supplementary Figure S1. <sup>1</sup>H and <sup>13</sup>C spectra.....S-33

Supplementary Figure S2. Sensitivity of different G810 mutants to LOXO292, HSL468, and HSND17. ....S-74

Supplementary Table S2. Eurofins KINOMEscan testing with 10 nM compound concentration.....S-75

Supplementary Table S3. Eurofins KINOMEscan testing with 100 nM compound concentration.....S-86

Supplementary Figure S3. TREEspot interaction map for compounds at 10 nM .....S-96

Supplementary Table S4. Metabolic stability in liver microsomes of alkynyl nicotinamides .....S-97

Supplementary Figure S4. Body weigh monitoring of mice during tumor treatment with RET TKIs.....S-98

### General Procedure for Sonogashira Coupling

A solution of bromo or iodo substrate (1 mmol), Pd(PPh<sub>3</sub>)<sub>4</sub> (10 mol%), CuI (5 mol%) and triphenylphosphine (10 mg) in triethylamine (30 equiv) was de-oxygenated using steam of argon gas. Followed by addition of a de-oxygenated solution of alkyne substrate (0.95 mmol) in DMF (4 mL) slowly over a period of 10 min. Reaction was allowed to stir at 55 °C for 12 h. After completion, reaction was quenched by addition of NH<sub>4</sub>Cl (5 mL) at room temperature and diluted with ethyl acetate (300 mL). The organic layer was extracted with water (2 × 50 mL) and washed with brine solution (1 × 50 mL). Combined organic layers were dried over anhydrous sodium sulphate, filtered and concentrated in vacuo. Purified by flash column chromatography using dichloromethane/ methanol (97:3 to 95:5).

### 2,3-Diethylpyrido[3,4-*b*]pyrazin-7-amine

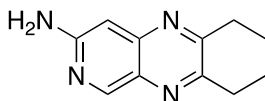

To a reaction vial, pyridine-2,4,5-triamine (150 mg, 0.797 mmol, 1 equiv.) and ethanol (10 mL) were added. Hexane-3,4-dione (90 mg, 0.645 mmol, 1 equiv.) was then added. The reaction was then allowed to stir for 2.5 hours at room temperature. An additional equivalent of hexane-3,4-dione was added 2.5 hours later. The reaction was then allowed to stir for an additional 1.5 hours. Upon reaction completion, crude mixture was concentrated under reduced pressure and purified via silica gel column chromatography.

Brown solid (80%); <sup>1</sup>H NMR (500 MHz, DMSO-*d*<sub>6</sub>) δ 8.78 (d, *J* = 0.8 Hz, 1H), 6.63 (d, *J* = 0.8 Hz, 1H), 6.27 (s, 2H), 2.89 (dq, *J* = 14.7, 7.4 Hz, 4H), 1.25 (td, *J* = 7.4, 0.9 Hz, 6H). <sup>13</sup>C NMR (126 MHz, DMSO-*d*<sub>6</sub>) δ 162.2, 159.5, 153.6, 152.1, 145.9, 130.4, 97.7, 28.1, 27.3, 12.0, 11.7. HRMS (ESI) *m/z* calcd for C<sub>11</sub>H<sub>15</sub>N<sub>4</sub> [M + H]<sup>+</sup> 203.1297, found 203.1301.

### 2,3-Diethyl-8-iodopyrido[3,4-*b*]pyrazin-7-amine

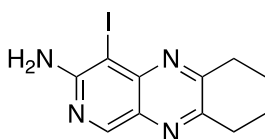

2,3-Diethylpyrido[3,4-*b*]pyrazin-7-amine (100 mg, 0.500 mmol, 1 equiv) were added to a reaction vial with methanol (5 mL). The reaction was then cooled to 0 °C and N-Iodosuccinimide (112 mg, 0.500 mol, 1.1 equiv) was slowly added over 10 minutes. The

reaction was then allowed to run at 0°C for 10 minutes. Crude mixture was concentrated down under reduced pressure and purified via column chromatography.

Off-white solid (64%); <sup>1</sup>H NMR (500 MHz, DMSO-*d*<sub>6</sub>) δ 8.73 (s, 1H), 6.49 (s, 2H), 2.99 (q, *J* = 7.3 Hz, 2H), 2.93 (q, *J* = 7.4 Hz, 2H), 1.34 (t, *J* = 7.2 Hz, 3H), 1.28 (t, *J* = 7.4 Hz, 3H). <sup>13</sup>C NMR (126 MHz, DMSO-*d*<sub>6</sub>) δ 163.0, 159.1, 154.7, 151.8, 145.4, 131.1, 74.4, 27.9, 26.9, 11.9, 11.3. HRMS (ESI) *m/z* calcd for C<sub>11</sub>H<sub>14</sub>IN<sub>4</sub> [M + H]<sup>+</sup> 329.0263, found 329.0263.

**5-((7-Amino-2,3-diethylpyrido[3,4-*b*]pyrazin-8-yl)ethynyl)-*N*-(4-((4-methylpiperazin-1-yl)methyl)-3-(trifluoromethyl)phenyl)nicotinamide (HSL507)**

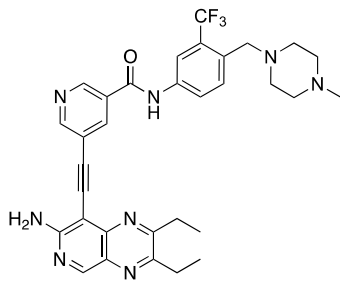

Synthesized by utilizing general procedure. Brown solid (63.1%); <sup>1</sup>H NMR (500 MHz, DMSO-*d*<sub>6</sub>) δ 10.84 (s, 1H), 9.05 (d, *J* = 2.2 Hz, 1H), 9.00 (d, *J* = 2.0 Hz, 1H), 8.88 (s, 1H), 8.58 (t, *J* = 2.1 Hz, 1H), 8.20 (d, *J* = 2.2 Hz, 1H), 8.04 (dd, *J* = 8.6, 2.2 Hz, 1H), 7.72 (d, *J* = 8.5 Hz, 1H), 7.04 (s, 2H), 3.58 (s, 2H), 3.02 (q, *J* = 7.3 Hz, 2H), 2.94 (q, *J* = 7.4 Hz, 2H), 2.54 (s, 8H), 2.31 (s, 3H), 1.38 (t, *J* = 7.3 Hz, 3H), 1.29 (t, *J* = 7.4 Hz, 3H). <sup>13</sup>C NMR (126 MHz, DMSO-*d*<sub>6</sub>) δ 164.2, 162.6, 160.3, 154.4, 154.2, 153.4, 147.7, 145.8, 138.4, 137.7, 132.6, 131.9, 130.4, 130.0, 128.1 (q, *J* = 30.2 Hz), 125.8 (q, *J* = 274.6 Hz), 124.0, 120.8, 117.7, 95.4, 90.6, 88.5, 57.6, 54.6, 52.2, 45.2, 28.1, 27.2, 11.8, 11.3. HRMS (ESI) *m/z* calcd for C<sub>32</sub>H<sub>34</sub>F<sub>3</sub>N<sub>8</sub>O [M + H]<sup>+</sup> 603.2807, found 603.2814.

**5,8-Dibromo-2,3-diethylpyrido[3,4-*b*]pyrazine**

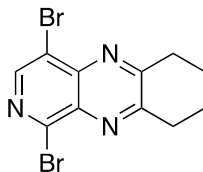

To a reaction vial, 2,5-dibromopyridine-3,4-diamine (300 mg, 0.123 mmol, 1 equiv.) and ethanol (10 mL) were added. Hexane-3,4-dione (256 mg, 2.25 mmol, 2 equiv.) was then added. The reaction was then allowed to stir at room temperature for 4 hours. After 4 hours, 2 more equivalents of hexane-3,4-dione was added. The reaction was then allowed to stir for 3 days.

Upon reaction completion, crude mixture was concentrated under reduced pressure and purified *via* silica gel column chromatography. Off white solid (82%); <sup>1</sup>H NMR (500 MHz, DMSO-*d*<sub>6</sub>) δ 8.79 (s, 1H), 3.16 – 3.10 (m, 4H), 1.37 (td, *J* = 7.2, 2.7 Hz, 6H); <sup>13</sup>C NMR (126 MHz, DMSO-*d*<sub>6</sub>) δ 164.7, 162.1, 146.8, 145.4, 142.4, 135.7, 120.3, 28.0, 27.7, 11.1, 11.0. HRMS (ESI) *m/z* calcd for C<sub>11</sub>H<sub>12</sub>Br<sub>2</sub>N<sub>3</sub> [M + H]<sup>+</sup> 343.9398, found 343.9410.

### 8-Bromo-*N*-(*tert*-butyl)-2,3-diethylpyrido[3,4-*b*]pyrazin-5-amine

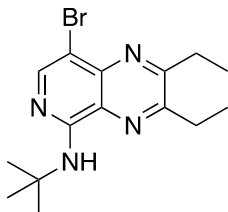

To a pressure tube fitted with a magnetic stir bar, 5,8-dibromo-2,3-diethylpyrido[3,4-*b*]pyrazine (153 mg, 0.443 mmol, 1 eq) in ethanol (3 mL) were added. *Tert*-butylamine (97.1 mg, 1.43 mmol, 3 eq) was then added and reaction was capped and moved to 110 °C. The reaction was then allowed to run for 16 hours. Following 16 hours, 3 additional equivalents of *tert*-butylamine was then added. The reaction was run for 3 days. Crude product was then cooled to room temperature and concentrated under reduced pressure. Pure product was obtained *via* silica gel column chromatography. Yellow solid (14%); <sup>1</sup>H NMR (500 MHz, DMSO) δ 8.23 (s, 1H), 6.83 (s, 1H), 2.68 (s, 4H), 2.66 (s, 4H), 1.50 (s, 10H); <sup>13</sup>C NMR (126 MHz, DMSO) δ 159.4, 155.1, 153.3, 146.1, 141.6, 127.5, 103.6, 51.7, 40.4, 40.3, 40.1, 39.9, 39.8, 39.6, 39.4, 28.8, 23.4, 22.8. HRMS (ESI) *m/z* calcd for C<sub>15</sub>H<sub>22</sub>BrN<sub>4</sub> [M + H]<sup>+</sup> 337.1028, found 337.1042.

### 8-Bromo-2,3-diethylpyrido[3,4-*b*]pyrazin-5-amine

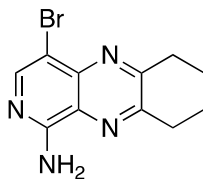

To a pressure tube fitted with a magnetic stir bar, 8-bromo-2,3-diethylpyrido[3,4-*b*]pyrazin-5-amine (163 mg, 0.445 mmol) in concentrated HCl (1.5 mL) were added. The reaction was capped and moved to 80 °C and run for 2 hours. The reaction was then diluted with water (50 mL) and neutralized using saturated sodium bicarbonate solution. Product was then extracted with ethyl acetate (3x 100 mL). Organic layers were dried over anhydrous sodium sulfate,

filtered, and concentrated under reduced pressure. Pure product was obtained via column chromatography. Yellow solid (68%);  $^1\text{H}$  NMR (500 MHz,  $\text{DMSO-}d_6$ )  $\delta$  8.16 (s, 1H), 7.14 (s, 2H), 3.01 (dq,  $J = 16.0, 7.3$  Hz, 4H), 1.33 (q,  $J = 7.3$  Hz, 6H).  $^{13}\text{C}$  NMR (126 MHz,  $\text{DMSO-}d_6$ )  $\delta$  162.5, 158.2, 156.6, 146.7, 141.7, 126.7, 103.8, 27.9, 27.2, 11.8, 11.7. HRMS (ESI)  $m/z$  calcd for  $\text{C}_{11}\text{H}_{14}\text{BrN}_4$   $[\text{M} + \text{H}]^+$  281.0402, found 281.0412.

**5-((5-Amino-2,3-diethylpyrido[3,4-*b*]pyrazin-8-yl)ethynyl)-*N*-(4-((4-methylpiperazin-1-yl)methyl)-3-(trifluoromethyl)phenyl)nicotinamide (HSND15)**

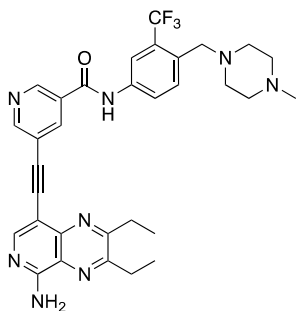

Synthesized by utilizing general procedure. Yellow solid (36%);  $^1\text{H}$  NMR (500 MHz,  $\text{DMSO-}d_6$ )  $\delta$  10.80 (s, 1H), 9.05 (d,  $J = 2.2$  Hz, 1H), 8.89 (d,  $J = 2.0$  Hz, 1H), 8.44 (t,  $J = 2.1$  Hz, 1H), 8.33 (s, 1H), 8.20 (d,  $J = 2.3$  Hz, 1H), 8.03 (dd,  $J = 8.4, 2.2$  Hz, 1H), 7.72 (d,  $J = 8.5$  Hz, 1H), 7.53 (bs, 2H), 3.56 (s, 2H), 3.12 – 2.97 (m, 4H), 2.44 – 2.24 (m, 8H), 2.14 (s, 3H), 1.43 – 1.30 (m, 6H);  $^{13}\text{C}$  NMR (126 MHz,  $\text{DMSO-}d_6$ )  $\delta$  164.0, 162.3, 159.0, 156.6, 153.9, 150.9, 147.8, 144.1, 138.3, 137.1, 133.0, 131.8, 130.3, 128.0 (q,  $J = 28.9$  Hz), 125.8 (q,  $J = 270.9$  Hz), 125.0, 124.0, 120.7, 117.7, 103.3, 90.9, 89.4, 57.9, 55.2, 53.1, 46.2, 27.9, 27.4, 11.7, 11.4. HRMS (ESI)  $m/z$  calcd for  $\text{C}_{32}\text{H}_{34}\text{F}_3\text{N}_8\text{O}$   $[\text{M} + \text{H}]^+$  603.2807, found 603.2805.

**5-((1*H*-Pyrazolo[3,4-*b*]pyridin-5-yl)ethynyl)-*N*-(4-((4-methylpiperazin-1-yl)methyl)-3-(trifluoromethyl)phenyl)nicotinamide (HSND17)**

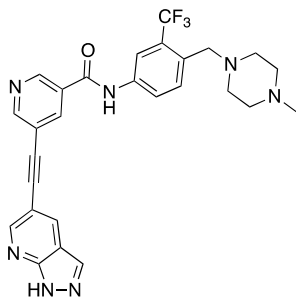

Synthesized by utilizing general procedure. Off-white solid (53%);  $^1\text{H}$  NMR (500 MHz,  $\text{DMSO-}d_6$ )  $\delta$  10.82 (s, 1H), 9.09 (d,  $J = 2.1$  Hz, 1H), 8.98 (d,  $J = 2.0$  Hz, 1H), 8.74 (d,  $J = 2.0$

Hz, 1H), 8.54 (dd,  $J = 3.8, 2.2$  Hz, 2H), 8.27 – 8.17 (m, 2H), 8.07 (dd,  $J = 8.5, 2.2$  Hz, 1H), 7.72 (d,  $J = 8.5$  Hz, 1H), 3.65 (s, 2H), 3.55-3.37 (bs, 8H), 2.69 (s, 3H);  $^{13}\text{C}$  NMR (126 MHz, DMSO- $d_6$ )  $\delta$  163.9, 154.4, 151.6, 151.0, 148.6, 138.6, 137.9, 134.4, 133.9, 132.0, 130.2, 128.2 (q,  $J = 30.2$  Hz), 125.7 (q,  $J = 274.6$  Hz), 124.0, 121.0, 119.5, 117.8, 114.4, 111.5, 91.8, 86.8, 57.0, 53.3, 50.1, 42.9; HRMS (ESI)  $m/z$  calcd for  $\text{C}_{30}\text{H}_{30}\text{F}_3\text{N}_8\text{O}$   $[\text{M} + \text{H}]^+$  575.2494, found 575.2489.

### 5,8-Dibromo-2,3-dimethylpyrido[3,4-b]pyrazine

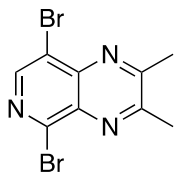

To a reaction vial, 2,5-dibromopyridine-3,4-diamine (300 mg, 0.123 mmol, 1 equiv.) and ethanol (10 mL) were added. Biacetyl (130 mg, 2.25 mmol, 2 equiv.) was then added. The reaction was then allowed to stir at room temperature for 4 hours. After 4 hours 2 more equivalents of biacetyl were added. The reaction was then allowed to stir for 3 days. Upon reaction completion, crude mixture was concentrated under reduced pressure. Pure compound was obtained via column chromatography. Off-white solid (82%);  $^1\text{H}$  NMR (500 MHz, DMSO- $d_6$ )  $\delta$  8.78 (s, 1H), 2.79 (s, 3H), 2.77 (s, 3H).  $^{13}\text{C}$  NMR (126 MHz, DMSO- $d_6$ )  $\delta$  162.0, 159.3, 146.8, 145.1, 142.7, 135.9, 119.9, 23.7, 23.5. HRMS (ESI)  $m/z$  calcd for  $\text{C}_9\text{H}_8\text{Br}_2\text{N}_3$   $[\text{M} + \text{H}]^+$  315.9085, found 315.9096.

### 8-Bromo-N-(tert-butyl)-2,3-dimethylpyrido[3,4-b]pyrazin-5-amine

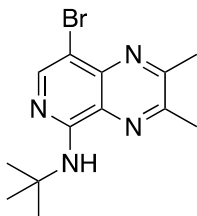

To a pressure tube fitted with a magnetic stir bar, 5,8-dibromo-2,3-dimethylpyrido[3,4-b]pyrazine (147 mg, 0.468 mmol, 1 eq) in ethanol (3 mL) was added. Tert-butylamine (106 mg, 1.4 mmol, 3 eq) were then added and reaction was capped and moved to 110 °C. The reaction was then allowed to run for 16 hours. Following 16 hours, 3 additional equivalents of tert-butylamine was then added. The reaction was then run for 3 days. Crude product was then cooled to room temperature and concentrated under reduced pressure. Pure product was

obtained via column chromatography. Yellow solid (16.6%);  $^1\text{H}$  NMR (500 MHz,  $\text{DMSO-}d_6$ )  $\delta$  8.23 (s, 1H), 6.83 (s, 1H), 2.68 (s, 3H), 2.66 (s, 3H), 1.50 (s, 9H).  $^{13}\text{C}$  NMR (126 MHz,  $\text{DMSO-}d_6$ )  $\delta$  159.4, 155.1, 153.3, 146.2, 141.6, 127.5, 103.6, 51.7, 28.8, 23.4, 22.8. HRMS (ESI)  $m/z$  calcd for  $\text{C}_{13}\text{H}_{18}\text{BrN}_4$   $[\text{M} + \text{H}]^+$  309.0715, found 309.0729.

### 8-Bromo-2,3-dimethylpyrido[3,4-b]pyrazin-5-amine

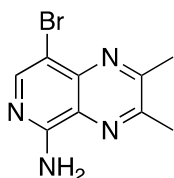

To a pressure tube fitted with a magnetic stir bar, 8-bromo-*N*-(*tert*-butyl)-2,3-dimethylpyrido[3,4-*b*]pyrazin-5-amine (88 mg, 0.285 mmol) in concentrated HCl (1 mL) were added. The reaction was capped and moved to 80 °C and run for 2 hours. The reaction was then diluted with water (50 mL) and neutralized using saturated sodium bicarbonate solution. Product was then extracted with ethyl acetate (3x 100 mL). Organic layers were dried over anhydrous sodium sulfate, filtered, and concentrated under reduced pressure. Pure product was obtained via column chromatography. Yellow solid (63%);  $^1\text{H}$  NMR (500 MHz,  $\text{DMSO-}d_6$ )  $\delta$  8.14 (s, 1H), 7.16 (s, 2H), 2.68 (s, 3H), 2.67 (s, 3H).  $^{13}\text{C}$  NMR (126 MHz,  $\text{DMSO-}d_6$ )  $\delta$  164.6, 163.1, 158.4, 151.4, 147.1, 132.0, 108.4, 28.5, 27.8. HRMS (ESI)  $m/z$  calcd for  $\text{C}_9\text{H}_{10}\text{BrN}_4$   $[\text{M} + \text{H}]^+$  253.0089, found 253.0097.

### 5-((5-Amino-2,3-dimethylpyrido[3,4-*b*]pyrazin-8-yl)ethynyl)-*N*-(4-((4-methylpiperazin-1-yl)methyl)-3-(trifluoromethyl)phenyl)nicotinamide (HSND16)

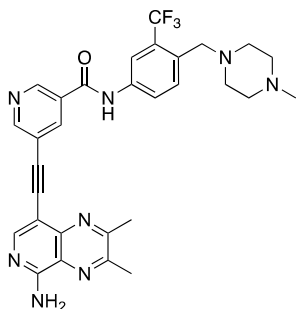

Synthesized by utilizing general procedure. Yellow solid (43%);  $^1\text{H}$  NMR (500 MHz,  $\text{DMSO-}d_6$ )  $\delta$  10.79 (s, 1H), 9.04 (d,  $J = 2.1$  Hz, 1H), 8.92 (d,  $J = 2.0$  Hz, 1H), 8.47 (t,  $J = 2.1$  Hz, 1H), 8.33 (s, 1H), 8.21 (d,  $J = 2.2$  Hz, 1H), 8.08 (dd,  $J = 8.4, 2.2$  Hz, 1H), 7.72 (d,  $J = 8.5$  Hz, 1H),



7.55 (s, 2H), 3.66 (s, 3H), 2.84 – 2.69 (m, 8H), 2.72 (s, 3H), 2.68 (s, 3H);  $^{13}\text{C}$  NMR (126 MHz, DMSO- $d_6$ )  $\delta$  164.0, 159.4, 158.9, 154.1, 153.3, 151.35, 147.9, 144.3, 138.6, 137.2, 132.0, 131.9, 130.2, 128.4 (q,  $J=27.7$  Hz), 125.7 (q,  $J=273.4$  Hz), 125.2, 124.0, 120.6, 117.8, 103.0, 91.0, 89.1, 57.0, 53.3, 50.0, 42.8, 23.7, 23.0. HRMS (ESI)  $m/z$  calcd for  $\text{C}_{30}\text{H}_{30}\text{F}_3\text{N}_8\text{O}$  [ $\text{M} + \text{H}$ ] $^+$  575.2494, found 575.2506.

### 2,3-Dimethylpyrido[3,4-*b*]pyrazin-7-amine

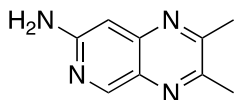

To a reaction vial, pyridine-2,4,5-triamine (80 mg, 0.645 mmol, 1 equiv.) and ethanol (5 mL) were added. Biacetyl (55.54 mg, 0.645 mmol, 1 equiv.) was then added. The reaction was then allowed to stir at room temperature for 2 hours. Upon reaction completion, crude mixture was concentrated under reduced pressure. Pure compound was obtained via column chromatography. Yellow solid (89%);  $^1\text{H}$  NMR (500 MHz, DMSO- $d_6$ )  $\delta$  8.75 (s, 1H), 6.60 (s, 1H), 6.28 (s, 2H), 2.56 (s, 3H), 2.53 (s, 3H);  $^{13}\text{C}$  NMR (126 MHz, DMSO- $d_6$ )  $\delta$  159.4, 159.2, 151.9, 150.3, 146.1, 130.6, 97.5, 23.7, 22.7. HRMS (ESI)  $m/z$  calcd for  $\text{C}_9\text{H}_{11}\text{N}_4$  [ $\text{M} + \text{H}$ ] $^+$  175.0984, found 175.0983.

### 8-Iodo-2,3-dimethylpyrido[3,4-*b*]pyrazin-7-amine

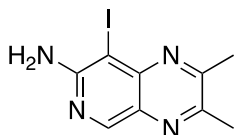

2,3-dimethylpyrido[3,4-*b*]pyrazin-7-amine (94.1 mg, 0.540 mmol, 1 equiv) were added to a reaction vial with methanol (10 mL). The reaction was then cooled to 0°C and N-Iodo succinimide (133.8 mg, 0.594 mol, 1.1 equiv) was slowly added over 10 minutes. The reaction was then allowed to run at 0°C for 15 minutes. Crude mixture was concentrated down under reduced pressure. Pure product was obtained via column chromatography. Brown solid (90.2%);  $^1\text{H}$  NMR (500 MHz, DMSO- $d_6$ )  $\delta$  8.71 (s, 1H), 6.50 (s, 2H), 2.64 (s, 3H), 2.58 (s, 3H);  $^{13}\text{C}$  NMR (126 MHz, DMSO- $d_6$ )  $\delta$  160.1, 159.1, 151.7, 151.3, 145.8, 131.3, 73.8, 23.7, 22.3. HRMS (ESI)  $m/z$  calcd for  $\text{C}_9\text{H}_{10}\text{IN}_4$  [ $\text{M} + \text{H}$ ] $^+$  300.9950, found 300.9950.

### 5-((7-Amino-2,3-dimethylpyrido[3,4-*b*]pyrazin-8-yl)ethynyl)-*N*-(4-((4-methylpiperazin-1-yl)methyl)-3-(trifluoromethyl)phenyl)nicotinamide (HSL476)

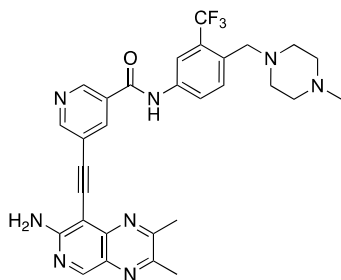

In a 25 mL round bottom flask containing 8-iodo-2,3-dimethylpyrido[3,4-b]pyrazin-7-amine (1 mmol), alkyne substrate (1.1 mmol), PdCl<sub>2</sub>(PPh<sub>3</sub>)<sub>2</sub> (3 mol%), XPhos (2 mol%), Cs<sub>2</sub>CO<sub>3</sub> (3 equiv) and CuI (1 mol%), anhydrous DMF (5 mL) and DIPEA (2.5 mL) was added under inert condition. Reaction mixture was allowed to stir at 60 °C for an overnight. After completion reaction mixture was concentrated and extracted with ethyl acetate. Organic layer was washed with brine solution (30 mL). Organic layer was passed through celite bad. Collected organic layer dried with sodium sulfate, concentrated and purified via silica gel column chromatography to yield the desired product. Yellow solid (57%); <sup>1</sup>H NMR (500 MHz, Methanol-*d*<sub>4</sub>) δ 9.01 (dd, *J* = 7.2, 2.0 Hz, 2H), 8.80 (s, 1H), 8.59 (t, *J* = 2.1 Hz, 1H), 8.14 (d, *J* = 2.3 Hz, 1H), 7.95 (dd, *J* = 8.5, 2.3 Hz, 1H), 7.77 (d, *J* = 8.5 Hz, 1H), 3.66 (s, 2H), 2.74 (s, 3H), 2.64 (s, 3H), 2.56 (s, 8H), 2.33 (s, 3H); <sup>13</sup>C NMR (126 MHz, Methanol-*d*<sub>4</sub>) δ 164.3, 160.1, 159.8, 153.5, 152.2, 151.4, 146.7, 145.8, 137.7, 137.5, 132.9, 131.2, 130.4, 130.2, 129.1 (q, *J* = 20.2 Hz), 127.5 (q, *J* = 274.6 Hz), 123.5, 121.0, 117.7, 94.9, 91.3, 86.8, 57.4, 54.5, 52.1, 44.4, 22.1, 21.1. HRMS (ESI) *m/z* calcd for C<sub>30</sub>H<sub>30</sub>F<sub>3</sub>N<sub>8</sub>O [M + H]<sup>+</sup> 575.2494, found 575.2512.

#### 4-Bromo-2,7-naphthyridin-1-amine

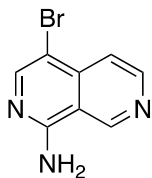

To a solution of 2,7-naphthyridine-1-amine (1 g, 6.9 mmol, 1 equiv) in CHCl<sub>3</sub> (60 mL) at 0 °C was added N-Bromo succinimide (1.23 g, 6.9 mmol, 1 equiv) slowly over a period of 10 min. The reaction was allowed to stir 1h, diluted the reaction mixture with CHCl<sub>3</sub> (200 mL) and washed with NaHCO<sub>3</sub> (5 × 200 mL) and brine solution (100 mL). Combined organic layers were dried over anhydrous sodium sulphate, filtered and concentrated in vacuo. The pure product was then obtained via flash column chromatography. Brown solid (68%); <sup>1</sup>H NMR (500 MHz, DMSO-*d*<sub>6</sub>) δ 9.52 (s, 1H), 8.71 (d, *J* = 5.8 Hz, 1H), 8.17 (s, 1H), 7.61 (d, *J* = 5.8

Hz, 1H), 7.58 (s, 2H);  $^{13}\text{C}$  NMR (126 MHz, DMSO- $d_6$ )  $\delta$  158.0, 149.6, 149.0, 148.2, 139.0, 117.7, 114.2, 102.3. HRMS (ESI)  $m/z$  calcd for  $\text{C}_8\text{H}_7\text{BrN}_3$   $[\text{M} + \text{H}]^+$  225.9798, found 225.9798.

**5-((1-Amino-2,7-naphthyridin-4-yl)ethynyl)-*N*-(4-((4-methylpiperazin-1-yl)methyl)-3-(trifluoromethyl)phenyl)nicotinamide (HSN721)**

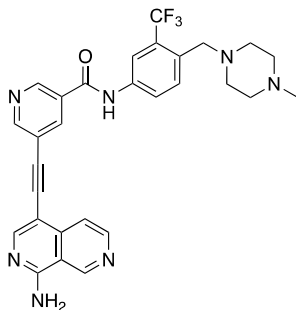

Synthesized by utilizing general procedure. Pale yellow solid (35%);  $^1\text{H}$  NMR (500 MHz, DMSO- $d_6$ )  $\delta$  10.78 (s, 1H), 9.60 (s, 1H), 9.05 (d,  $J = 2.2$  Hz, 1H), 8.99 (d,  $J = 2.1$  Hz, 1H), 8.72 (dd,  $J = 5.7, 2.2$  Hz, 1H), 8.55 (t,  $J = 2.2$  Hz, 1H), 8.37 (d,  $J = 2.2$  Hz, 1H), 8.20 (d,  $J = 2.3$  Hz, 1H), 8.04 (dd,  $J = 8.5, 2.3$  Hz, 1H), 7.99 – 7.90 (m, 3H), 7.71 (d,  $J = 8.6$  Hz, 1H), 3.55 (s, 2H), 2.43 – 2.29 (m, 8H), 2.15 (d,  $J = 2.5$  Hz, 3H).  $^{13}\text{C}$  NMR (126 MHz, DMSO- $d_6$ )  $\delta$  164.0, 158.6, 154.0, 152.2, 149.6, 148.8, 148.0, 140.4, 138.3, 137.3, 132.9, 131.7, 130.2, 128.0 (q,  $J = 28.9$  Hz), 125.8 (q,  $J = 274.6$  Hz), 124.0, 120.2, 117.7, 117.5, 112.0, 100.8, 90.3, 89.9, 57.8, 55.1, 53.0, 46.0. HRMS (ESI)  $m/z$  calcd for  $\text{C}_{29}\text{H}_{27}\text{F}_3\text{N}_7\text{O}$   $[\text{M} + \text{H}]^+$  546.2224, found 546.2221.

**4-Bromo-2,6-naphthyridin-1-amine**

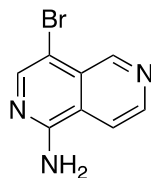

To a solution of 2,6-naphthyridine-1-amine (1 g, 6.9 mmol, 1 equiv) in  $\text{CHCl}_3$  (60 mL) at 0  $^\circ\text{C}$  was added *N*-Bromo succinimide (1.23 g, 6.9 mmol, 1 equiv) slowly over a period of 10 min. The reaction was allowed to stir for 1h, diluted the reaction mixture with  $\text{CHCl}_3$  (200 mL) and washed with  $\text{NaHCO}_3$  ( $5 \times 200$  mL) and brine solution (100 mL). Combined organic layers were dried over anhydrous sodium sulphate, filtered and concentrated in vacuo. The pure product was then obtained via flash column chromatography. Brown solid (70%);  $^1\text{H}$  NMR (500 MHz, DMSO- $d_6$ )  $\delta$  9.20 (d,  $J = 0.9$  Hz, 1H), 8.68 (d,  $J = 5.7$  Hz, 1H), 8.09 (dd,  $J = 5.8,$

0.9 Hz, 1H), 8.08 (s, 1H), 7.42 (s, 2H);  $^{13}\text{C}$  NMR (126 MHz,  $\text{DMSO-}d_6$ )  $\delta$  157.0, 149.7, 145.2, 129.2, 122.4, 116.9, 101.8. HRMS (ESI)  $m/z$  calcd for  $\text{C}_8\text{H}_7\text{BrN}_3$   $[\text{M} + \text{H}]^+$  225.9798, found 225.9798.

**5-((1-Amino-2,6-naphthyridin-4-yl)ethynyl)-*N*-(4-((4-methylpiperazin-1-yl)methyl)-3-(trifluoromethyl)phenyl)nicotinamide (HSN722)**

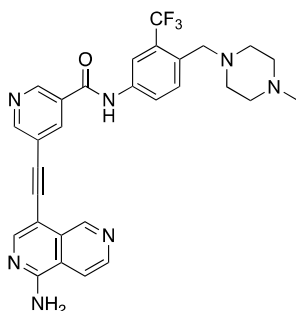

Synthesized by utilizing general procedure. Yellow solid (41%);  $^1\text{H}$  NMR (500 MHz,  $\text{DMSO-}d_6$ )  $\delta$  10.76 (s, 1H), 9.53 (s, 1H), 9.04 (dd,  $J = 8.1, 2.1$  Hz, 2H), 8.69 (d,  $J = 5.7$  Hz, 1H), 8.59 (t,  $J = 2.1$  Hz, 1H), 8.32 (s, 1H), 8.20 (d,  $J = 2.2$  Hz, 1H), 8.18 – 8.14 (m, 1H), 8.04 (dd,  $J = 8.5, 2.2$  Hz, 1H), 7.79 (s, 2H), 7.73 (d,  $J = 8.5$  Hz, 1H), 3.57 (s, 2H), 2.48 – 2.24 (m, 8H), 2.18 (s, 3H);  $^{13}\text{C}$  NMR (126 MHz,  $\text{DMSO-}d_6$ )  $\delta$  164.0, 157.5, 154.1, 149.5, 149.4, 148.0, 145.2, 138.3, 137.4, 132.9, 131.8, 130.4, 130.3, 127.8, 125.8 (q,  $J = 274.6$  Hz), 124.0, 120.1, 119.9, 117.7, 117.1, 100.6, 90.5, 89.6, 57.8, 55.0, 52.9, 45.9. HRMS (ESI)  $m/z$  calcd for  $\text{C}_{29}\text{H}_{27}\text{F}_3\text{N}_7\text{O}$   $[\text{M} + \text{H}]^+$  546.2224, found 546.2221.

**1-Aminoisoquinoline-6-carbonitrile**

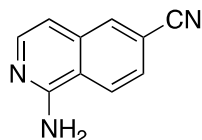

A solution of 1-aminoisoquinoline-6-carbonitrile (600 mg, 2.69 mmol, 1 equiv),  $\text{Pd}(\text{PPh}_3)_4$  (932 mg, 0.81 mmol, 0.3 equiv),  $\text{Zn}(\text{CN})_2$  (630 mg, 5.38 mmol, 2 equiv) in DMF (12 mL) was de-oxygenated using steam of Argon gas. The reaction temperature was increased to 90 °C and allowed to stir 12 h. The reaction was filtered and diluted with ethyl acetate (300 mL). The organic layer was washed with water ( $3 \times 100$  mL) and washed with brine ( $1 \times 100$  mL). Combined organic layers were dried over anhydrous sodium sulphate, filtered and concentrated in vacuo. The pure product was obtained by flash column chromatography. Brown solid (75%);  $^1\text{H}$  NMR (500 MHz,  $\text{DMSO-}d_6$ )  $\delta$  8.33 (d,  $J = 8.6$  Hz, 1H), 8.30 (s, 1H), 7.91 (d,  $J = 5.7$  Hz,

1H), 7.76 (dd,  $J = 8.6, 1.7$  Hz, 1H), 7.08 (s, 2H), 6.97 (d,  $J = 5.7$  Hz, 1H);  $^{13}\text{C}$  NMR (126 MHz, DMSO- $d_6$ )  $\delta$  157.7, 144.2, 136.7, 132.8, 126.6, 126.0, 119.1, 118.6, 112.8, 109.6. HRMS (ESI)  $m/z$  calcd for  $\text{C}_{10}\text{H}_8\text{N}_3$   $[\text{M} + \text{H}]^+$  170.0713, found 170.0718.

### 1-Amino-4-bromoisoquinoline-6-carbonitrile

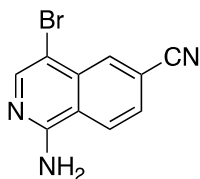

To a solution of 6-cyano isoquinolin-1-amine (320 mg, 1.88 mmol, 1 equiv) in  $\text{CHCl}_3$  (20 mL) at 0 °C was added N-bromosuccinimide (1.23 g, 6.9 mmol, 1 equiv) slowly over a period of 10 min. The reaction was allowed to stir for an hour. Reaction mixture was diluted with  $\text{CHCl}_3$  (200 mL) and washed with  $\text{NaHCO}_3$  ( $5 \times 200$  mL) and brine solution (100 mL). Combined organic layers were dried over anhydrous sodium sulphate, filtered and concentrated in vacuo. The pure product was then obtained via silica gel column chromatography. Yellow solid (70%);  $^1\text{H}$  NMR (500 MHz, DMSO- $d_6$ )  $\delta$  8.40 (d,  $J = 8.5$  Hz, 1H), 8.25 (s, 1H), 8.10 (s, 1H), 7.91 (d,  $J = 8.5$  Hz, 1H), 7.39 (s, 2H);  $^{13}\text{C}$  NMR (126 MHz, DMSO- $d_6$ )  $\delta$  157.6, 145.5, 134.7, 130.9, 128.1, 126.8, 120.3, 118.6, 114.5, 103.5. HRMS (ESI)  $m/z$  calcd for  $\text{C}_{10}\text{H}_7\text{BrN}_3$   $[\text{M} + \text{H}]^+$  247.9823, found 247.9824.

### 5-((1-Amino-6-cyanoisoquinolin-4-yl)ethynyl)-*N*-(4-((4-methylpiperazin-1-yl)methyl)-3-(trifluoromethyl)phenyl)nicotinamide (HSN804)

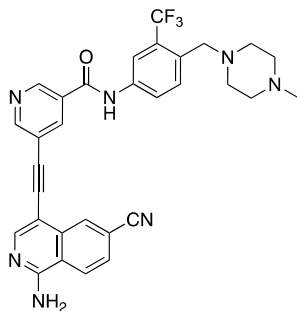

Synthesized by utilizing general procedure. Yellow solid (59 %);  $^1\text{H}$  NMR (500 MHz, DMSO- $d_6$ )  $\delta$  10.77 (s, 1H), 9.06 (dd,  $J = 8.7, 2.1$  Hz, 2H), 8.60 (s, 1H), 8.59 (t,  $J = 2.2$  Hz, 1H), 8.46 (d,  $J = 8.6$  Hz, 1H), 8.33 (s, 1H), 8.21 (d,  $J = 2.2$  Hz, 1H), 8.04 (d,  $J = 8.5$  Hz, 1H), 7.93 (dd,  $J = 8.6, 1.7$  Hz, 1H), 7.77 (s, 2H), 7.73 (d,  $J = 8.5$  Hz, 1H), 3.57 (s, 2H), 2.39 (s, 8H), 2.18 (s, 3H); NMR (126 MHz, DMSO- $d_6$ )  $\delta$  164.1, 158.2, 154.3, 149.9, 148.0, 138.3, 137.5, 135.9, 132.9, 131.8, 130.4, 130.3, 128.1, 128.0 (q,  $J = 28.1$  Hz), 126.5, 125.8 (q,  $J = 274.6$  Hz), 124.0,

120.2, 118.8, 118.0, 117.7, 114.3, 102.0, 90.6, 90.0, 57.8, 55.1, 53.0, 46.0. HRMS (ESI)  $m/z$  calcd for  $C_{31}H_{27}F_3N_7O$   $[M + H]^+$  570.2222, found 570.2219.

**5-((6-Amino-4-cyanopyridin-3-yl)ethynyl)-*N*-(4-((4-methylpiperazin-1-yl)methyl)-3-(trifluoromethyl)phenyl)nicotinamide (HSN631)**

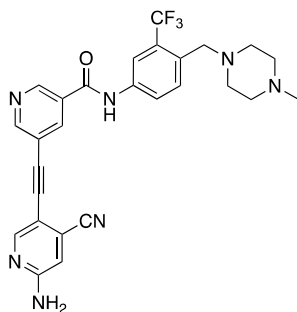

Synthesized by utilizing general procedure. Yellow solid (36%);  $^1H$  NMR (500 MHz,  $DMSO-d_6$ )  $\delta$  10.77 (s, 1H), 9.08 (d,  $J = 2.2$  Hz, 1H), 8.88 (d,  $J = 2.0$  Hz, 1H), 8.42 (t,  $J = 2.1$  Hz, 1H), 8.39 (s, 1H), 8.18 (d,  $J = 2.3$  Hz, 1H), 8.01 (dd,  $J = 8.5, 2.2$  Hz, 1H), 7.72 (d,  $J = 8.5$  Hz, 1H), 7.15 (s, 2H), 6.86 (s, 1H), 3.56 (s, 2H), 2.38 (s, 8H), 2.18 (s, 3H);  $^{13}C$  NMR (126 MHz,  $DMSO-d_6$ )  $\delta$  163.8, 159.7, 154.0, 153.5, 148.6, 138.2, 137.5, 132.9, 131.8, 130.3, 128.0, 125.8 (q,  $J = 274.6$  Hz), 124.0, 122.5, 119.3, 117.7, 116.3, 111.1, 105.7, 90.0, 88.8, 57.8, 55.0, 52.9, 45.9. HRMS (ESI)  $m/z$  calcd for  $C_{27}H_{25}F_3N_7O$   $[M + H]^+$  520.2067, found 520.2068.

**3-Aminoisoquinoline-6-carbonitrile<sup>1</sup>**

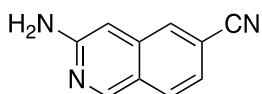

Synthesized using literature procedure<sup>1</sup>

**3-Amino-4-iodoisoquinoline-6-carbonitrile**

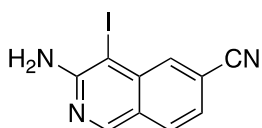

To a solution of 6-cyano isoquinolin-3-amine (480 mg, 2.81 mmol, 1 equiv) in methanol (40 mL) at 0 °C N-Iodo succinimide (696 mg, 3.09 mmol, 1.1 equiv) was added slowly over a period of 10 min. The reaction was allowed to stir for 15 min. After that reaction was concentrated and purified by flash column chromatography.

Yellow solid (72%);  $^1\text{H}$  NMR (500 MHz,  $\text{DMSO-}d_6$ )  $\delta$  8.91 (s, 1H), 8.02 – 7.99 (m, 2H), 7.50 (dd,  $J = 8.4, 1.4$  Hz, 1H), 6.56 (s, 2H);  $^{13}\text{C}$  NMR (126 MHz,  $\text{DMSO-}d_6$ )  $\delta$  157.9, 153.2, 138.9, 133.9, 130.8, 124.3, 123.2, 119.0, 114.8, 71.6. HRMS (ESI)  $m/z$  calcd for  $\text{C}_{10}\text{H}_7\text{IN}_3$   $[\text{M} + \text{H}]^+$  295.9679, found 295.9681.

**5-((3-Amino-6-cyanoisoquinolin-4-yl)ethynyl)-*N*-(4-((4-methylpiperazin-1-yl)methyl)-3-(trifluoromethyl)phenyl)nicotinamide (HSN742)**

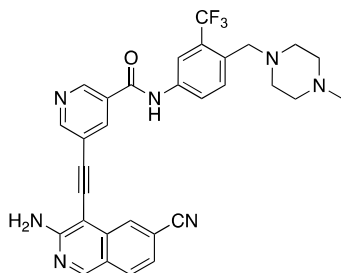

Synthesized by utilizing general procedure. Yellow solid (90%);  $^1\text{H}$  NMR (500 MHz,  $\text{DMSO-}d_6$ )  $\delta$  10.79 (s, 1H), 9.23 (d,  $J = 2.0$  Hz, 1H), 9.04 (s, 2H), 8.75 (t,  $J = 2.1$  Hz, 1H), 8.47 (s, 1H), 8.20 (d,  $J = 2.2$  Hz, 1H), 8.08 (d,  $J = 8.3$  Hz, 1H), 8.04 (dd,  $J = 8.5, 2.2$  Hz, 1H), 7.72 (d,  $J = 8.5$  Hz, 1H), 7.53 (dd,  $J = 8.3, 1.5$  Hz, 1H), 7.14 (s, 2H), 3.56 (s, 2H), 2.37 (s, 8H), 2.16 (s, 3H);  $^{13}\text{C}$  NMR (126 MHz,  $\text{DMSO-}d_6$ )  $\delta$  164.3, 159.3, 154.7, 154.1, 147.8, 138.3, 137.9, 136.9, 132.9, 131.8, 130.7, 130.4, 128.8, 127.8 (q,  $J = 28.9$  Hz), 125.8 (q,  $J = 273.4$  Hz), 123.9, 123.6, 122.7, 120.2, 119.2, 117.6, 114.5, 96.7, 88.5, 87.6, 57.8, 55.1, 53.0, 46.1. HRMS (ESI)  $m/z$  calcd for  $\text{C}_{31}\text{H}_{27}\text{F}_3\text{N}_7\text{O}$   $[\text{M} + \text{H}]^+$  570.2224, found 570.2224.

**5-((5-Amino-1,6-naphthyridin-8-yl)ethynyl)-*N*-(4-((4-methylpiperazin-1-yl)methyl)-3-(trifluoromethyl)phenyl)nicotinamide (HSN757)**

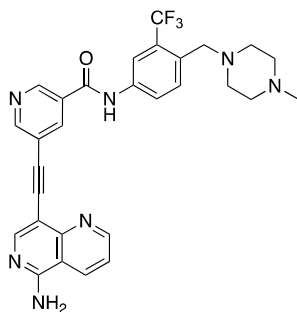

Synthesized by utilizing general procedure. Yellow solid (21%);  $^1\text{H}$  NMR (500 MHz,  $\text{DMSO-}d_6$ )  $\delta$  10.78 (s, 1H), 9.08 – 9.01 (m, 2H), 8.90 (d,  $J = 2.0$  Hz, 1H), 8.70 (dd,  $J = 8.4, 1.7$  Hz, 1H), 8.48 (t,  $J = 2.1$  Hz, 1H), 8.39 (s, 1H), 8.21 (d,  $J = 2.2$  Hz, 1H), 8.04 (dd,  $J = 8.4, 2.2$  Hz, 1H), 7.75 – 7.68 (m, 3H), 7.60 – 7.57 (m, 1H), 3.56 (s, 2H), 2.37 (s, 8H), 2.15 (s, 3H);  $^{13}\text{C}$  NMR (126 MHz,  $\text{DMSO-}d_6$ )  $\delta$  164.0, 159.1, 154.8, 154.2, 152.0, 151.7, 147.9, 138.3, 137.2,

133.5, 132.9, 131.7, 130.1, 127.8, 125.8 (q,  $J = 274.6$  Hz), 124.0, 122.0, 120.7, 117.7, 112.3, 104.5, 91.9, 89.0, 57.9, 55.1, 53.1, 46.1. HRMS (ESI)  $m/z$  calcd for  $C_{29}H_{27}F_3N_7O$   $[M + H]^+$  546.2224, found 546.2231.

**5-((1-Amino-6-cyanoisoquinolin-4-yl)ethynyl)-6-methyl-N-(4-((4-methylpiperazin-1-yl)methyl)-3-(trifluoromethyl)phenyl)nicotinamide (HSN805)**

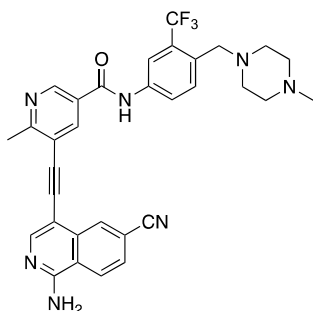

Synthesized by utilizing general procedure. Yellow solid (30%);  $^1H$  NMR (500 MHz,  $DMSO-d_6$ )  $\delta$  10.70 (s, 1H), 8.95 (d,  $J = 2.2$  Hz, 1H), 8.55 (d,  $J = 2.2$  Hz, 1H), 8.51 (s, 1H), 8.47 (d,  $J = 8.6$  Hz, 1H), 8.33 (s, 1H), 8.20 (d,  $J = 2.2$  Hz, 1H), 8.05 (dd,  $J = 8.6, 2.2$  Hz, 1H), 7.93 (dd,  $J = 8.6, 1.7$  Hz, 1H), 7.77 (s, 2H), 7.71 (d,  $J = 8.5$  Hz, 1H), 3.57 (s, 2H), 2.81 (s, 3H), 2.41 (s, 8H), 2.21 (s, 3H);  $^{13}C$  NMR (126 MHz,  $DMSO-d_6$ )  $\delta$  164.1, 162.4, 158.1, 149.7, 147.4, 138.4, 138.0, 135.9, 132.7, 131.8, 130.2, 128.0, 127.9, 127.8 (q,  $J = 27.7$  Hz), 126.6, 125.8 (q,  $J = 273.4$  Hz), 123.9, 118.8, 118.0, 117.7, 114.2, 102.2, 92.7, 90.7, 57.8, 54.9, 52.8, 24.2. HRMS (ESI)  $m/z$  calcd for  $C_{32}H_{29}F_3N_7O$   $[M + H]^+$  584.2379, found 584.2375.

**5-((3-Amino-6-cyanoisoquinolin-4-yl)ethynyl)-6-methyl-N-(4-((4-methylpiperazin-1-yl)methyl)-3-(trifluoromethyl)phenyl)nicotinamide (HSN806)**

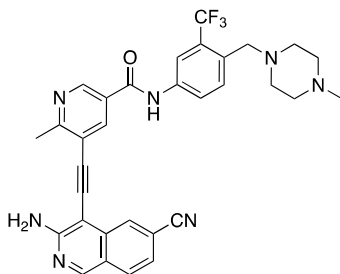

Synthesized by utilizing general procedure. Yellow solid (35%);  $^1H$  NMR (500 MHz,  $DMSO-d_6$ )  $\delta$  10.72 (s, 1H), 9.06 (s, 1H), 8.96 (d,  $J = 2.2$  Hz, 1H), 8.73 (d,  $J = 2.3$  Hz, 1H), 8.33 (s, 1H), 8.20 (d,  $J = 2.2$  Hz, 1H), 8.11 (d,  $J = 8.3$  Hz, 1H), 8.04 (dd,  $J = 8.5, 2.2$  Hz, 1H), 7.72 (d,  $J = 8.5$  Hz, 1H), 7.55 (dd,  $J = 8.3, 1.5$  Hz, 1H), 7.07 (s, 2H), 3.56 (s, 2H), 2.86 (s, 3H), 2.37 (s, 8H), 2.16 (s, 3H);  $^{13}C$  NMR (126 MHz,  $DMSO-d_6$ )  $\delta$  164.3, 162.3, 159.1, 154.0, 147.4, 138.8,



138.3, 136.9, 132.8, 131.8, 130.9, 128.8, 128.6, 128.1, 128.0 (q,  $J = 28.9$  Hz), 125.87 (q,  $J = 274.6$  Hz), 123.9, 123.5, 122.7, 119.2, 119.0, 117.6, 114.5, 96.8, 90.3, 88.8, 57.9, 55.1, 53.1, 46.1, 24.4. HRMS (ESI)  $m/z$  calcd for  $C_{32}H_{29}F_3N_7O$   $[M + H]^+$  584.2379, found 584.2374.

**5-((6-Aminopyridin-3-yl)ethynyl)-*N*-(4-((4-methylpiperazin-1-yl)methyl)-3-(trifluoromethyl)phenyl)nicotinamide (HSN815)**

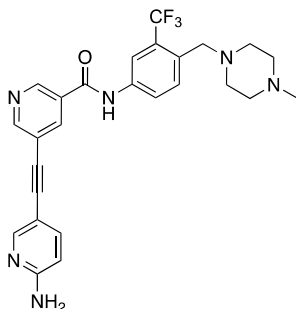

Synthesized by utilizing general procedure. Off-white solid (59%);  $^1H$  NMR (500 MHz,  $DMSO-d_6$ )  $\delta$  10.71 (s, 1H), 9.01 (d,  $J = 2.2$  Hz, 1H), 8.85 (d,  $J = 2.0$  Hz, 1H), 8.41 (t,  $J = 2.1$  Hz, 1H), 8.18 (d,  $J = 2.2$  Hz, 1H), 8.17 (dd,  $J = 2.4, 0.8$  Hz, 1H), 8.02 (dd,  $J = 8.5, 2.2$  Hz, 1H), 7.71 (d,  $J = 8.5$  Hz, 1H), 7.54 (dd,  $J = 8.6, 2.3$  Hz, 1H), 6.53 (s, 2H), 6.47 (dd,  $J = 8.6, 0.8$  Hz, 1H), 3.56 (s, 2H), 2.38 (s, 8H), 2.17 (s, 3H);  $^{13}C$  NMR (126 MHz,  $DMSO-d_6$ )  $\delta$  163.9, 160.1, 153.9, 152.1, 147.9, 139.9, 138.3, 137.2, 132.9, 131.8, 130.2, 128.0 (q,  $J = 28.9$  Hz), 125.8 (q,  $J = 273.4$  Hz), 123.6, 120.26, 117.6, 108.1, 105.5, 93.0, 85.7, 57.8, 55.0, 52.9, 46.0. HRMS (ESI)  $m/z$  calcd for  $C_{26}H_{26}F_3N_6O$   $[M + H]^+$  495.2115, found 495.2111.

**5-((6-Aminopyridin-3-yl)ethynyl)-6-methyl-*N*-(4-((4-methylpiperazin-1-yl)methyl)-3-(trifluoromethyl)phenyl)nicotinamide (HSN816)**

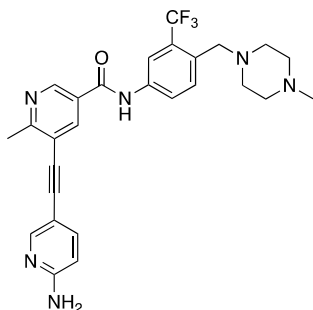

Synthesized by utilizing general procedure. Off-white solid (53%);  $^1H$  NMR (500 MHz,  $DMSO-d_6$ )  $\delta$  10.63 (s, 1H), 8.91 (d,  $J = 2.3$  Hz, 1H), 8.36 (d,  $J = 2.3$  Hz, 1H), 8.18 (d,  $J = 2.2$  Hz, 2H), 8.02 (dd,  $J = 8.6, 2.2$  Hz, 1H), 7.70 (d,  $J = 8.5$  Hz, 1H), 7.55 (dd,  $J = 8.6, 2.4$  Hz, 1H), 6.52 (s, 2H), 6.48 (d,  $J = 8.6$  Hz, 1H), 3.55 (d,  $J = 1.7$  Hz, 2H), 2.70 (s, 3H), 2.36 (d,  $J = 19.9$

Hz, 8H), 2.16 (s, 3H);  $^{13}\text{C}$  NMR (126 MHz,  $\text{DMSO-}d_6$ )  $\delta$  163.9, 162.4, 160.0, 151.9, 147.3, 139.8, 138.3, 137.5, 132.8, 131.7, 128.0, 127.8, 125.8 (q,  $J = 274.6$  Hz), 123.9, 118.9, 117.7, 108.2, 105.8, 95.7, 85.9, 57.8, 55.1, 53.0, 46.0, 24.0. HRMS (ESI)  $m/z$  calcd for  $\text{C}_{27}\text{H}_{28}\text{F}_3\text{N}_6\text{O}$   $[\text{M} + \text{H}]^+$  509.2271, found 509.2266.

### 8-Bromo-2,3-dimethylpyrido[3,4-*b*]pyrazine

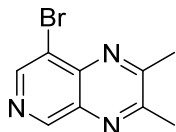

To a reaction vial, 5-bromopyridine-3,4-diamine (100 mg, 0.532 mmol, 1 equiv.) and ethanol (10 mL) were added. Biacetyl (45.8 mg, 0.532 mmol, 1 equiv.) was then added. The reaction was then allowed to stir at room temperature for 2 hours. Upon reaction completion, crude mixture was concentrated under reduced pressure. Pure compound was obtained via column chromatography. Brown solid (92%);  $^1\text{H}$  NMR (500 MHz,  $\text{DMSO-}d_6$ )  $\delta$  9.21 (s, 1H), 8.90 (s, 1H), 2.73 (s, 3H), 2.71 (s, 3H).  $^{13}\text{C}$  NMR (126 MHz,  $\text{DMSO-}d_6$ )  $\delta$  161.3, 158.3, 152.4, 147.8, 141.4, 137.2, 119.3, 23.9, 23.2. HRMS (ESI)  $m/z$  calcd for  $\text{C}_9\text{H}_9\text{BrN}_3$   $[\text{M} + \text{H}]^+$  237.9980, found 237.9980.

### 5-((2,3-Dimethylpyrido[3,4-*b*]pyrazin-8-yl)ethynyl)-*N*-(4-((4-methylpiperazin-1-yl)methyl)-3-(trifluoromethyl)phenyl)nicotinamide (HSL211)

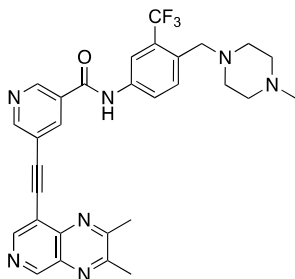

Synthesized by utilizing general procedure. Off-white solid (24%);  $^1\text{H}$  NMR (500 MHz,  $\text{DMSO-}d_6$ )  $\delta$  10.78 (s, 1H), 9.36 (s, 1H), 9.13 (d,  $J = 2.2$  Hz, 1H), 9.06 – 8.94 (m, 2H), 8.58 (t,  $J = 2.1$  Hz, 1H), 8.19 (d,  $J = 2.2$  Hz, 1H), 8.02 (dd,  $J = 8.5, 2.2$  Hz, 1H), 7.72 (d,  $J = 8.5$  Hz, 1H), 3.56 (s, 2H), 2.80 (s, 3H), 2.75 (s, 3H), 2.37 (s, 8H), 2.15 (s, 3H).  $^{13}\text{C}$  NMR (126 MHz,  $\text{DMSO-}d_6$ )  $\delta$  163.8, 161.0, 158.0, 154.6, 153.5, 150.2, 149.1, 143.4, 138.2, 138.0, 135.8, 133.0, 131.8, 130.3, 128.0 (q,  $J = 274.6$  Hz), 125.8 (q,  $J = 274.6$  Hz), 124.0, 119.2, 117.7, 116.0, 93.1, 88.2, 57.8, 55.1, 53.1, 46.1, 24.1, 23.5. HRMS (ESI)  $m/z$  calcd for  $\text{C}_{30}\text{H}_{29}\text{F}_3\text{N}_7\text{O}$   $[\text{M} + \text{H}]^+$  560.2385, found 560.2401.

**5-((5-Aminopyrimidin-2-yl)ethynyl)-N-(4-((4-methylpiperazin-1-yl)methyl)-3-(trifluoromethyl)phenyl)nicotinamide (HSL468)**

To a vial with 5-bromopyrimidin-2-amine (70 mg, 0.402 mmol, 1 equiv), Pd(PPh<sub>3</sub>)<sub>2</sub>Cl<sub>2</sub> (10 mol %), CuI, PPh<sub>3</sub> anhydrous TEA (1.5 mL) was added. The solution was then degassed with a stream of argon gas for 10 minutes. A solution of 5-ethynyl-N-(4-((4-methylpiperazin-1-yl)methyl)-3-(trifluoromethyl)phenyl)nicotinamide (197.1 mg, 0.482 mmol, 1.2 equiv) in anhydrous degasses DMF (3 mL) was then slowly added over the course of 10 minutes. Once addition was complete, it was then moved to 55°C and allowed to run overnight. The reaction was then cooled to room temperature and concentrated under reduced pressure. Pure product was then obtained via column chromatography.

Off white solid (30.2%). <sup>1</sup>H NMR (500 MHz, DMSO-*d*<sub>6</sub>) δ 10.77 (s, 1H), 9.05 (d, *J* = 2.1 Hz, 1H), 8.87 (d, *J* = 2.0 Hz, 1H), 8.47 (s, 2H), 8.44 (t, *J* = 2.1 Hz, 1H), 8.19 (d, *J* = 2.2 Hz, 1H), 8.03 (dd, *J* = 8.6, 2.2 Hz, 1H), 7.71 (d, *J* = 8.5 Hz, 1H), 7.25 (s, 2H), 3.57 (s, 2H), 2.41 (s, 8H), 2.21 (s, 3H); <sup>13</sup>C NMR (125 MHz, DMSO-*d*<sub>6</sub>) δ 163.8, 154.8, 148.9, 148.9, 139.8, 138.3, 134.9, 132.5, 131.9, 130.2, 128.1, 127.8 (q, *J* = 28.7 Hz), 125.7 (q, *J* = 272.5 Hz), 123.9, 119.8, 118.9, 117.7, 85.6, 80.1, 57.4, 54.2, 51.6, 44.6. HRMS (ESI) *m/z* calcd for C<sub>25</sub>H<sub>25</sub>F<sub>3</sub>N<sub>7</sub>O [M + H]<sup>+</sup> 496.2072, found 496.2075.

**8-Bromopyrido[3,4-*b*]pyrazine**

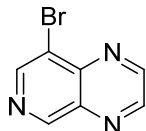

To a reaction vial, 5-bromopyridine-3,4-diamine (250 mg, 1.33 mmol, 1 equiv.) and ethanol (10 mL) were added. Oxalaldehyde (77 mg, 1.33 mmol, 1 equiv.) was then added. The reaction was then allowed to stir at room temperature for 6 hours. Upon reaction completion, crude mixture was concentrated under reduced pressure. Pure compound was obtained via column chromatography. Off white solid (85%) <sup>1</sup>H NMR (500 MHz, DMSO-*d*<sub>6</sub>) δ 9.48 (s, 1H), 9.27 (d, *J* = 1.8 Hz, 1H), 9.17 (d, *J* = 1.7 Hz, 1H), 9.12 (s, 1H). <sup>13</sup>C NMR (126 MHz, DMSO-*d*<sub>6</sub>) δ 154.2, 151.6, 149.1, 148.9, 143.0, 138.9, 120.2. HRMS (ESI) *m/z* calcd for C<sub>7</sub>H<sub>5</sub>BrN<sub>3</sub> [M + H]<sup>+</sup> 209.9667, found 209.9667.

***N*-(4-((4-Methylpiperazin-1-yl)methyl)-3-(trifluoromethyl)phenyl)-5-(pyrido[3,4-*b*]pyrazin-8-ylethynyl)nicotinamide**

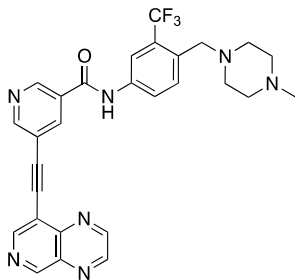

Synthesized by utilizing general procedure. Brown solid (16%);  $^1\text{H}$  NMR (500 MHz,  $\text{DMSO-}d_6$ )  $\delta$  10.81 (s, 1H), 9.55 (s, 1H), 9.30 (d,  $J = 1.8$  Hz, 1H), 9.20 (d,  $J = 1.7$  Hz, 1H), 9.16 (s, 1H), 9.14 (d,  $J = 2.2$  Hz, 1H), 9.04 (d,  $J = 2.0$  Hz, 1H), 8.61 (t,  $J = 2.1$  Hz, 1H), 8.20 (d,  $J = 2.3$  Hz, 1H), 8.04 (dd,  $J = 8.5, 2.2$  Hz, 1H), 7.72 (d,  $J = 8.5$  Hz, 1H), 3.57 (s, 2H), 2.40 (s, 8H), 2.19 (s, 3H);  $^{13}\text{C}$  NMR (126 MHz,  $\text{DMSO-}d_6$ )  $\delta$  163.7, 155.1, 154.5, 151.4, 151.0, 149.3, 149.1, 145.0, 138.2, 138.1, 137.4, 132.9, 131.8, 130.3, 128.0 (q,  $J = 28.9$  Hz), 125.8 (q,  $J = 274.6$  Hz), 124.0, 119.1, 117.7, 116.9, 93.7, 87.7, 57.8, 55.0, 52.9, 45.9. HRMS (ESI)  $m/z$  calcd for  $\text{C}_{28}\text{H}_{25}\text{F}_3\text{N}_7\text{O}$   $[\text{M} + \text{H}]^+$  532.2072, found 532.2091.

**4-Iodoisoquinolin-3-amine**

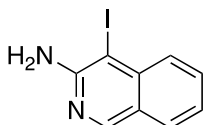

To a solution of isoquinolin-3-amine (500 mg, 3.47 mmol, 1 equiv) in methanol (30 mL) at 0 °C was added N-Iodo succinimide (858 mg, 3.8 mmol, 1.2 equiv) slowly over a period of 10 min. The reaction was allowed to stir for 15 min., concentrated. The product was purified by flash column chromatography.

Brown solid (68%);  $^1\text{H}$  NMR (500 MHz,  $\text{DMSO-}d_6$ )  $\delta$  8.78 (s, 1H), 7.82 (d,  $J = 8.1$  Hz, 1H), 7.62 (d,  $J = 1.0$  Hz, 1H), 7.62 – 7.60 (m, 1H), 7.26 (ddd,  $J = 8.0, 4.7, 3.2$  Hz, 1H), 6.18 (s, 2H);  $^{13}\text{C}$  NMR (126 MHz,  $\text{DMSO-}d_6$ )  $\delta$  156.5, 152.6, 139.6, 132.6, 128.9, 128.1, 123.1, 72.8. HRMS (ESI)  $m/z$  calcd for  $\text{C}_9\text{H}_8\text{IN}_2$   $[\text{M} + \text{H}]^+$  270.9727, found 270.9728.

**5-((1-amino-6-fluoroisoquinolin-4-yl)ethynyl)-*N*-(4-((4-methylpiperazin-1-yl)methyl)-3-(trifluoromethyl)phenyl)nicotinamide (HSN692)**

A solution of Bromo compound 1a (134 mg, 0.56 mmol, 1.5 equiv),  $\text{Pd}(\text{PPh}_3)_4$  (10 mol%),  $\text{CuI}$  (5 mol%) and Triphenylphosphine (10 mg) in Triethylamine (1.5 mL) was de-oxygenated

using steam of Argon gas. A de-oxygenated solution of alkyne 1b (150 mg, 0.37 mmol, 1 equiv) in DMF (4 mL) was added slowly over a period of 10 min to the solution and the reaction temperature was increased to 55 °C and allowed to stir 12 h. The reaction was diluted with ethyl acetate (300 mL). The organic layer was washed with water (5 × 50 mL), and brine (1 × 50 mL). Combined organic layers were dried over anhydrous sodium sulphate, filtered and concentrated in vacuo. The pure product HSN692 was obtained by flash column chromatography. Yield = 51 %.; TLC  $R_f$  = 0.2 (10 % MeOH/CH<sub>2</sub>Cl<sub>2</sub>)

<sup>1</sup>H NMR (500 MHz, DMSO-*d*<sub>6</sub>) δ 10.82 (s, 1H), 9.15 (d, *J* = 2.1 Hz, 1H), 9.03 – 8.99 (m, 1H), 8.60 (t, *J* = 2.1 Hz, 1H), 8.23 – 8.18 (m, 2H), 8.03 (dd, *J* = 8.4, 2.3 Hz, 2H), 7.71 (m, 3H), 7.48 (s, 3H), 3.56 (s, 2H), 2.39 (s, 8H), 2.18 (s, 3H); <sup>13</sup>C NMR (126 MHz, DMSO) δ 163.58, 149.68, 139.32, 138.23, 137.35, 134.83, 133.01, 131.82, 131.14, 130.32, 128.82, 128.05, 127.81, 125.82, 123.99, 123.65, 117.68, 113.73, 79.80, 76.89, 57.83, 55.04, 52.91, 45.92; HRMS (ESI<sup>+</sup>): calcd. for C<sub>30</sub>H<sub>27</sub>F<sub>4</sub>N<sub>6</sub>O (MH<sup>+</sup>) 563.2177, found 563.2182

**5-((3-Aminoisoquinolin-4-yl)ethynyl)-*N*-(4-((4-methylpiperazin-1-yl)methyl)-3-(trifluoromethyl)phenyl)nicotinamide (HSN700)**

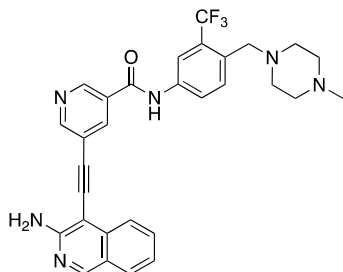

Synthesized by utilizing general procedure. Yellow solid (61%); <sup>1</sup>H NMR (500 MHz, DMSO-*d*<sub>6</sub>) δ 10.79 (s, 1H), 9.14 (d, *J* = 2.0 Hz, 1H), 9.03 (d, *J* = 2.2 Hz, 1H), 8.91 (d, *J* = 0.7 Hz, 1H), 8.67 (t, *J* = 2.1 Hz, 1H), 8.20 (d, *J* = 2.2 Hz, 1H), 8.08 – 7.98 (m, 2H), 7.90 (d, *J* = 8.1 Hz, 1H), 7.73 (d, *J* = 8.5 Hz, 1H), 7.66 (ddd, *J* = 8.3, 6.8, 1.3 Hz, 1H), 7.28 (ddd, *J* = 8.0, 6.8, 1.1 Hz, 1H), 6.78 (s, 2H), 3.58 (s, 2H), 2.42 (s, 8H), 2.23 (s, 3H); <sup>13</sup>C NMR (126 MHz, DMSO-*d*<sub>6</sub>) δ 164.3, 158.4, 154.3, 153.7, 147.6, 138.3, 137.9, 137.6, 132.8, 132.2, 131.8, 130.3, 129.1, 128.0 (q, *J* = 55.4 Hz), 125.84 (q, *J* = 275.9 Hz), 124.0, 123.1, 122.8, 122.3, 120.5, 117.7, 95.8, 89.0, 88.5, 57.7, 54.9, 52.7, 45.7. HRMS (ESI) *m/z* calcd for C<sub>30</sub>H<sub>28</sub>F<sub>3</sub>N<sub>6</sub>O [M + H]<sup>+</sup> 545.2271, found 545.2271.

**4-Iodo-6-methylisoquinolin-3-amine:**

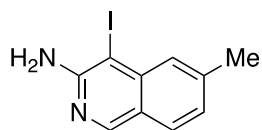

To a solution of 6-methylisoquinolin-3-amine (1 g, 6.3 mmol, 1 equiv) in methanol (40 mL) at 0 °C was added N-Iodo succinimide (1.56 mg, 6.96 mmol, 1.1 equiv) slowly over a period of 10 min. The reaction was allowed to stir for 15 min, concentrated. The reaction mixture was purified by flash column chromatography.

Brown solid (67%); <sup>1</sup>H NMR (500 MHz, DMSO-*d*<sub>6</sub>) δ 8.69 (s, 1H), 7.72 (d, *J* = 8.2 Hz, 1H), 7.40 (s, 1H), 7.10 (dd, *J* = 8.2, 1.5 Hz, 1H), 6.11 (s, 2H), 2.45 (s, 3H); <sup>13</sup>C NMR (126 MHz, DMSO-*d*<sub>6</sub>) δ 156.5, 152.1, 142.7, 139.8, 128.8, 127.0, 125.3, 122.4, 22.3. HRMS (ESI) *m/z* calcd for C<sub>10</sub>H<sub>10</sub>IN<sub>2</sub> [M + H]<sup>+</sup> 284.9883, found 284.9883.

**5-((3-Amino-6-methylisoquinolin-4-yl)ethynyl)-*N*-(4-((4-methylpiperazin-1-yl)methyl)-3-(trifluoromethyl)phenyl)nicotinamide (HSN744)**

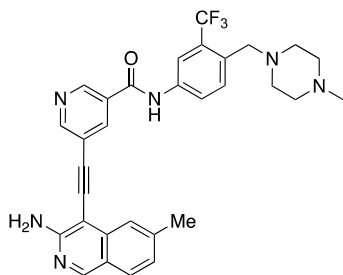

Synthesized by utilizing general procedure. Yellow solid (76%); <sup>1</sup>H NMR (500 MHz, DMSO-*d*<sub>6</sub>) δ 10.84 (s, 1H), 9.14 (d, *J* = 2.0 Hz, 1H), 9.04 (d, *J* = 2.2 Hz, 1H), 8.82 (s, 1H), 8.70 (s, 1H), 8.23 (d, *J* = 2.2 Hz, 1H), 8.06 (dd, *J* = 8.5, 2.2 Hz, 1H), 7.86 – 7.66 (m, 3H), 7.11 (dd, *J* = 8.3, 1.6 Hz, 1H), 6.70 (s, 2H), 3.58 (s, 2H), 2.46 – 2.37 (m, 8H), 2.23 (s, 3H); <sup>13</sup>C NMR (126 MHz, DMSO-*d*<sub>6</sub>) δ 164.3, 158.6, 154.3, 153.2, 147.6, 142.4, 138.4, 138.2, 137.6, 132.8, 131.8, 130.3, 129.0, 128.0 (q, *J* = 28.9 Hz), 125.8 (q, *J* = 273.4 Hz), 125.4, 124.0, 121.7, 120.8, 120.6, 117.7, 95.7, 89.2, 88.2, 57.7, 54.9, 52.6, 45.6, 22.3. HRMS (ESI) *m/z* calcd for C<sub>32</sub>H<sub>30</sub>F<sub>3</sub>N<sub>6</sub>O [M + H]<sup>+</sup> 559.2427, found 559.2431.

**5-((1-Aminoisoquinolin-4-yl)ethynyl)-*N*-(4-((4-methylpiperazin-1-yl)methyl)-3-(trifluoromethyl)phenyl)nicotinamide (HSN789)**

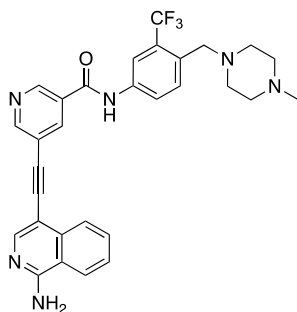

Synthesized by utilizing general procedure. Yellow solid (50%);  $^1\text{H}$  NMR (500 MHz,  $\text{DMSO-}d_6$ )  $\delta$  10.75 (s, 1H), 9.03 (d,  $J = 2.2$  Hz, 1H), 8.99 (d,  $J = 2.0$  Hz, 1H), 8.53 (t,  $J = 2.1$  Hz, 1H), 8.29 (d,  $J = 8.3$  Hz, 1H), 8.20 (s, 2H), 8.15 (d,  $J = 7.8$  Hz, 1H), 8.04 (dd,  $J = 8.5, 2.2$  Hz, 1H), 7.80 (t,  $J = 7.3$  Hz, 1H), 7.73 (d,  $J = 8.5$  Hz, 1H), 7.61 – 7.55 (m, 1H), 7.47 (d,  $J = 16.5$  Hz, 3H), 3.57 (s, 2H), 2.38 (s, 8H), 2.17 (s, 3H);  $^{13}\text{C}$  NMR (126 MHz,  $\text{DMSO-}d_6$ )  $\delta$  164.0, 158.4, 154.0, 148.2, 147.8, 138.3, 137.2, 136.3, 134.8, 132.9, 131.8, 131.6, 130.3, 128.8, 126.8, 125.8 (q,  $J = 274.6$  Hz), 124.9, 124.0, 120.4, 117.6, 116.6, 102.3, 91.5, 89.8, 57.8, 55.1, 53.0, 46.0. HRMS (ESI)  $m/z$  calcd for  $\text{C}_{30}\text{H}_{28}\text{F}_3\text{N}_6\text{O}$   $[\text{M} + \text{H}]^+$  545.2271, found 545.2268.

Synthesis and characterization of compounds HSN608, 632, 648, 649, 670, 650 and 690 reported in reference 2.

Synthesis and characterization of compounds HSN431, 576 and 580 reported in references 3 and 4.

## References:

1. Kemp, Mark Ian et al. Preparation of heterocyclic carbonitrile, carboxamide, and urea derivatives for pharmaceutical use. PCT Int. Appl., 2017103614, 22 Jun **2017**.
2. Wang, M., Naganna, N. and Sintim, H.O. Identification of nicotinamide aminonaphthyridine compounds as potent RET kinase inhibitors and antitumor activities against RET rearranged lung adenocarcinoma. *Bioorganic chemistry*, **2019**, *90*, 103052.
3. Larocque, E.A., Naganna, N., Opoku-Temeng, C., Lambrecht, A.M. and Sintim, H.O. Alkynynicotinamide-Based Compounds as ABL1 Inhibitors with Potent Activities against Drug-Resistant CML Harboring ABL1 (T315I) Mutant Kinase. *ChemMedChem*, **2018**, *13*, 1172-1180.
4. Naganna, N., Opoku-Temeng, C., Choi, E.Y., Larocque, E., Chang, E.T., Carter-Cooper, B.A., Wang, M., Torregrosa-Allen, S.E., Elzey, B.D., Lapidus, R.G. and

Sintim, H.O. Amino alkynylisoquinoline and alkynylnaphthyridine compounds potently inhibit acute myeloid leukemia proliferation in mice. *EBioMedicine*, **2019**, *40*, 231-239.



**Table S1.** HPLC Purity

| <b>Compound<sup>method</sup></b> | <b>Retention Time</b> | <b>% Purity area</b> |
|----------------------------------|-----------------------|----------------------|
| HSL507 <sup>d</sup>              | 19.8                  | 95                   |
| HSND_15 <sup>a</sup>             | 18.8                  | 99                   |
| HSND_17 <sup>a</sup>             | 19.5                  | 95                   |
| HSND16 <sup>d</sup>              | 16.8                  | 95                   |
| HSL476 <sup>d</sup>              | 15.2                  | 95                   |
| HSN721 <sup>a</sup>              | 14.9                  | 95                   |
| HSN722 <sup>a</sup>              | 18.1                  | 97                   |
| HSN804 <sup>a</sup>              | 15.9                  | 95                   |
| HSN631 <sup>a</sup>              | 14.9                  | 96                   |
| HSN650 <sup>a</sup>              | 17.5                  | 95                   |
| HSN742 <sup>d</sup>              | 14.6                  | 95                   |
| HSN757 <sup>a</sup>              | 14.8                  | 95                   |
| HSN805 <sup>a</sup>              | 17.7                  | 95                   |
| HSN806 <sup>d</sup>              | 18.7                  | 95                   |
| HSN815 <sup>a</sup>              | 14.9                  | 95                   |
| HSN816 <sup>d</sup>              | 14.8                  | 95                   |
| HSL211 <sup>d</sup>              | 14.0                  | 95                   |
| HSL468 <sup>c</sup>              | 13.0                  | 95                   |
| HSL212 <sup>a</sup>              | 16.7                  | 96                   |
| HSN431 <sup>a</sup>              | 19.9                  | 99                   |
| HSN576 <sup>a</sup>              | 19.9                  | 98                   |
| HSN580 <sup>a</sup>              | 21.4                  | 100                  |
| HSN692 <sup>a</sup>              | 19.3                  | 98                   |
| HSN700 <sup>a</sup>              | 17.5                  | 97                   |
| HSN744 <sup>a</sup>              | 19.4                  | 98                   |
| HSN789 <sup>a</sup>              | 16.6                  | 95                   |

<sup>a</sup>UV detection wavelength 280 nm, Agilent Eclipse instrument; C18 column 5C<sub>18</sub>-MS-II COSMOSIL (4.6ID × 250 mm); method: 0 → 5 min 50% B, 5 → 8 min 50 to 90% B, 8 → 30 min 90% B (A: 0.1% NH<sub>4</sub>OH in H<sub>2</sub>O, B: MeOH), 25 °C.

<sup>b</sup>UV detection wavelength 250 nm, Agilent Eclipse instrument; C18 column 5C<sub>18</sub>-MS-II COSMOSIL (4.6ID × 250 mm); method: 0 → 10 min 50% B, 10 → 12 min 50 to 90% B, 12 → 19 min 90% B, 19 → 20 min 90 to 50% B (A: 0.1% NH<sub>4</sub>OH in H<sub>2</sub>O, B: MeOH), 25 °C.

UV detection wavelength 250 nm, Agilent Eclipse instrument; C18 column 5C<sub>18</sub>-MS-II COSMOSIL (4.6ID × 250 mm); method: 0 → 10 min 50% B, 10 → 12 min 50 to 90% B, 12 → 19 min 90% B, 19 → 20 min 90 to 50% B (A: 0.1% NH<sub>4</sub>OH in H<sub>2</sub>O, B: MeOH), 25 °C.

UV detection wavelength 280 nm, Agilent Eclipse instrument; C18 column 5C<sub>18</sub>-MS-II COSMOSIL (4.6ID × 250 mm); method: 0 → 5 min 50% B, 5 → 8 min 50 to 100% B, 8 → 30 min 100% B (A: 0.1% NH<sub>4</sub>OH in H<sub>2</sub>O, B: MeOH), 25 °C.

## HPLC Chromatogram

### Compound HSL507

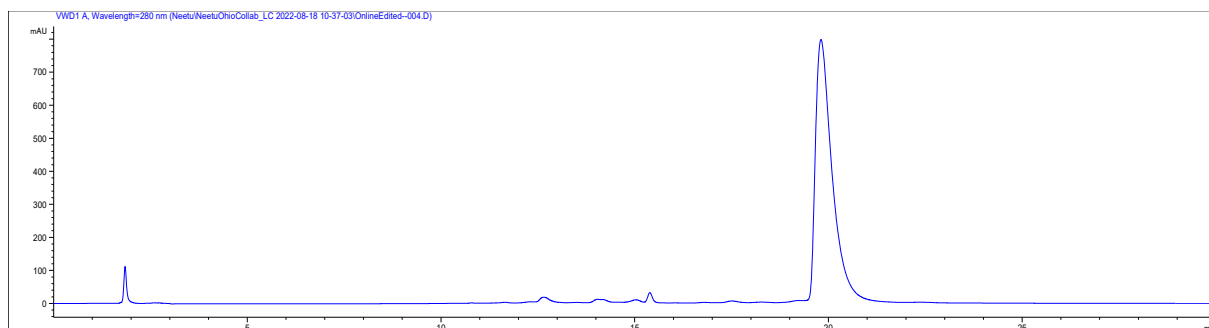

### Compound HSND15

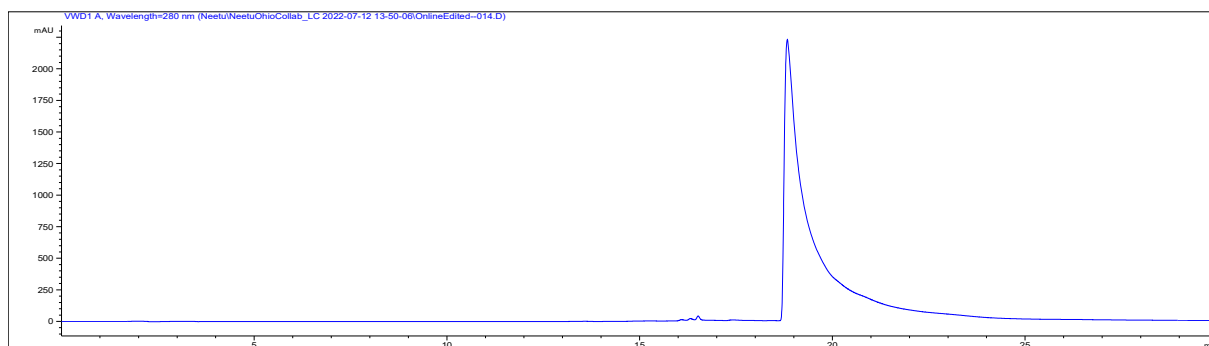

### Compound HSND17

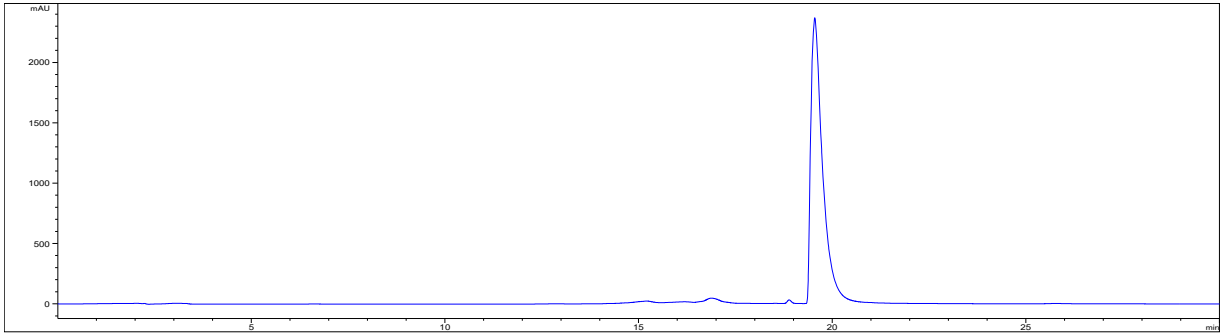

**Compound HSND16**

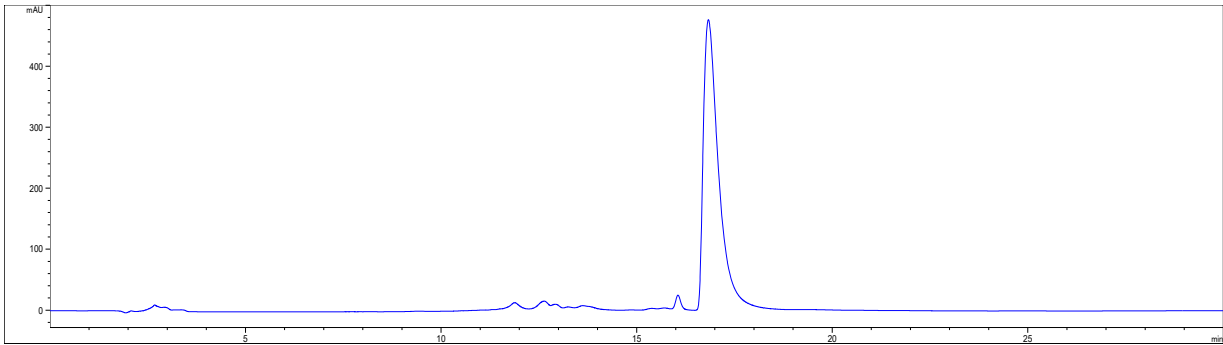

**Compound HSL476**

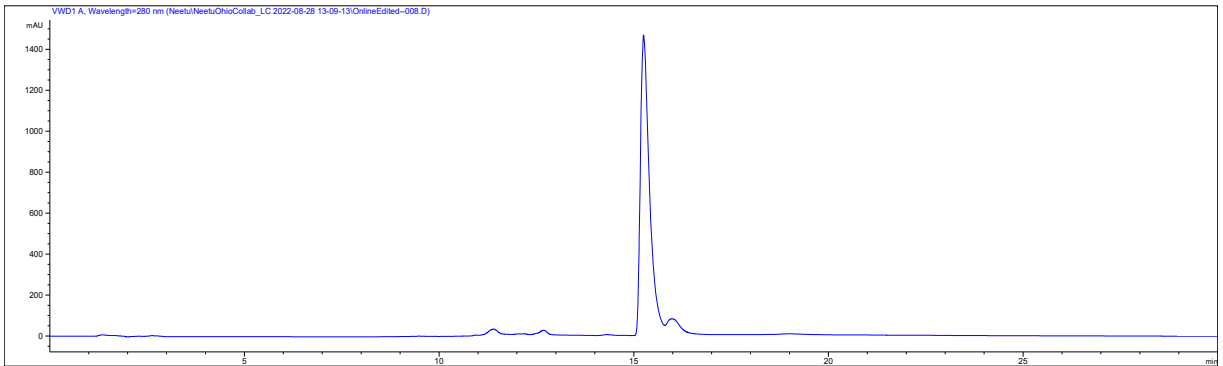

**Compound HSN721**

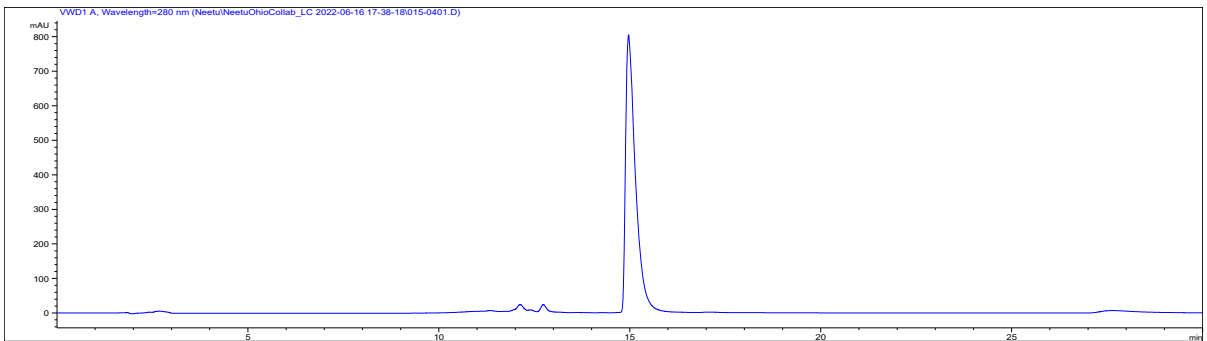

**Compound HSN722**

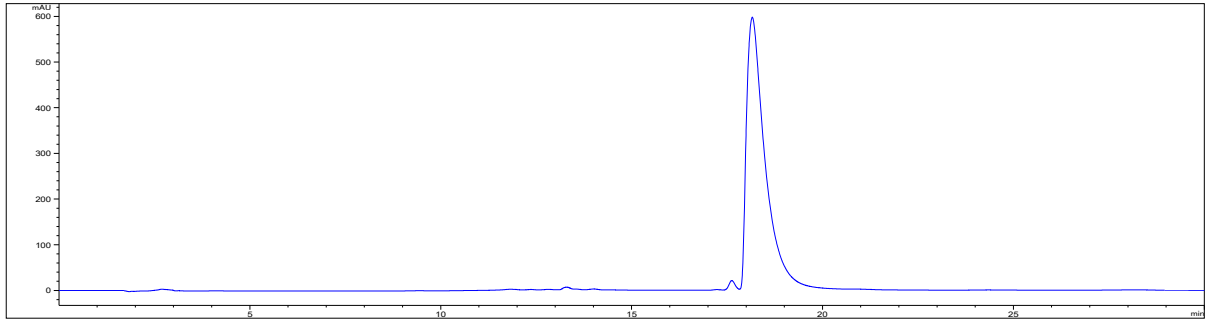

**Compound HSN804**

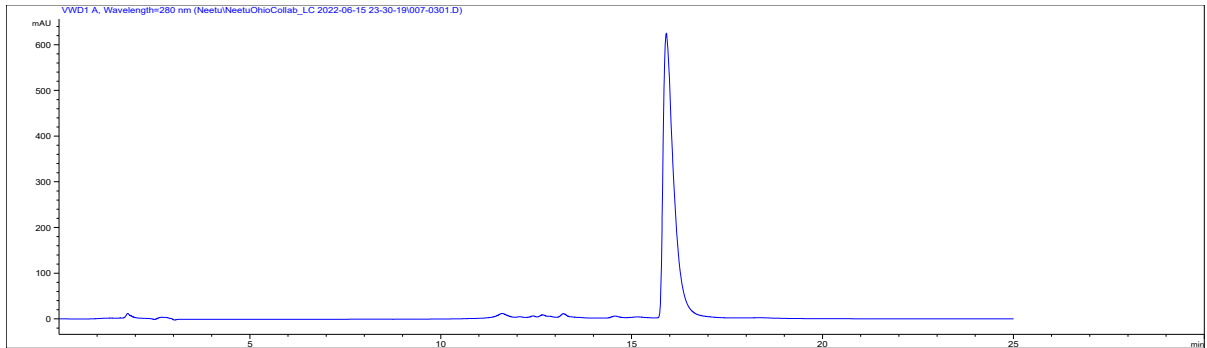

**Compound HSN631**

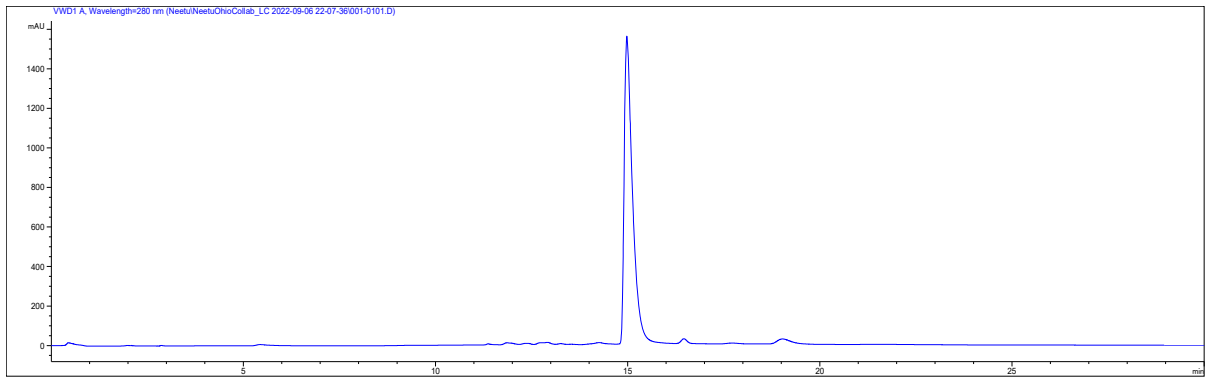

**Compound HSN650**

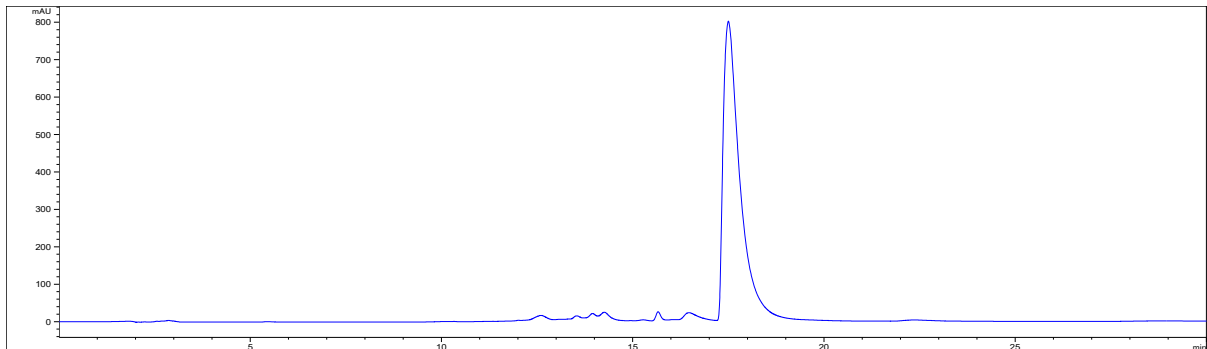

**Compound HSN742**

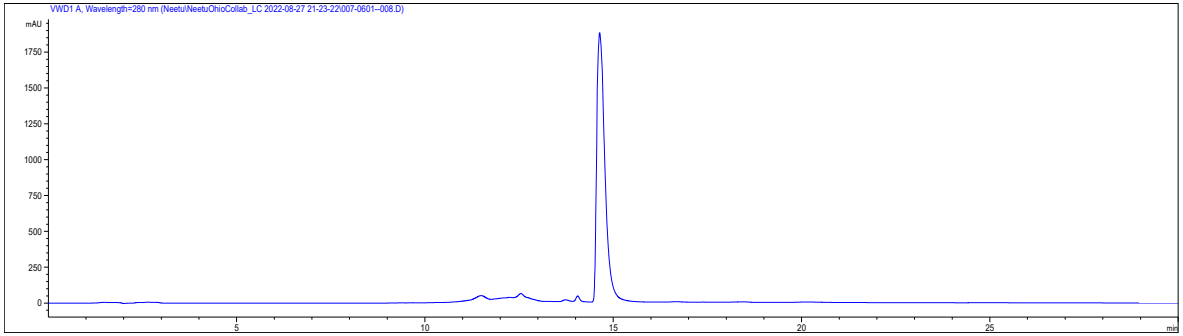

**Compound HSN757**

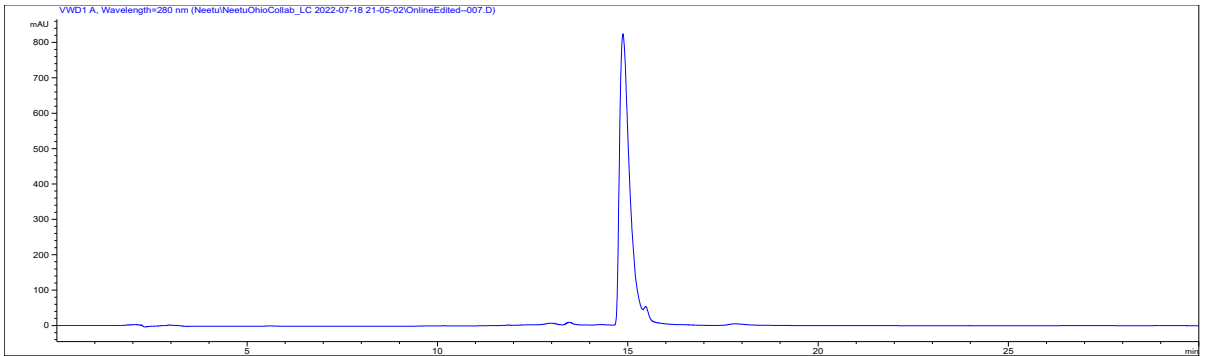

**Compound HSN805**

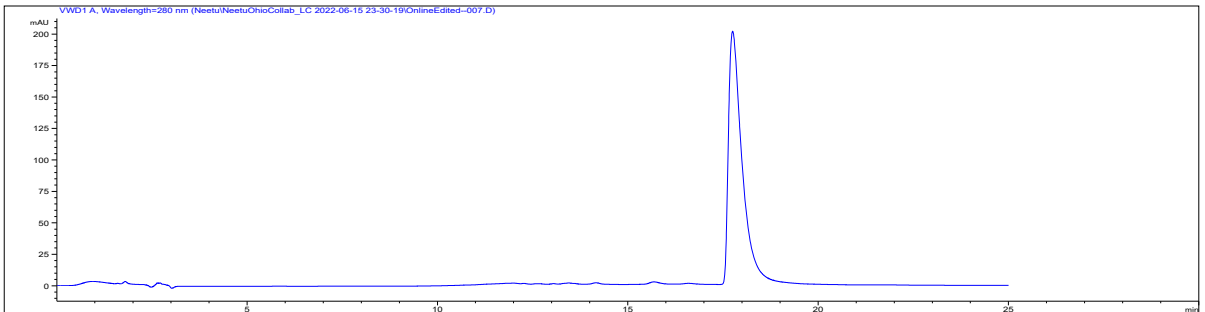

**Compound HSN806**

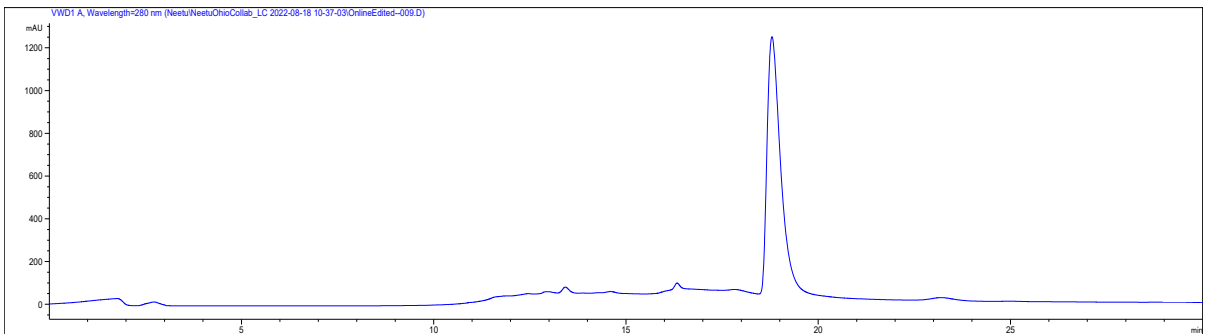

**Compound HSN815**

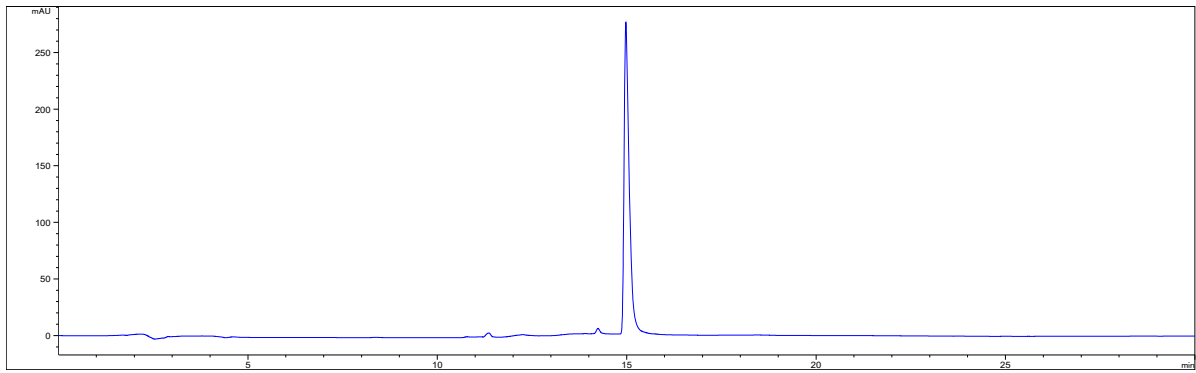

**Compound HSN816**

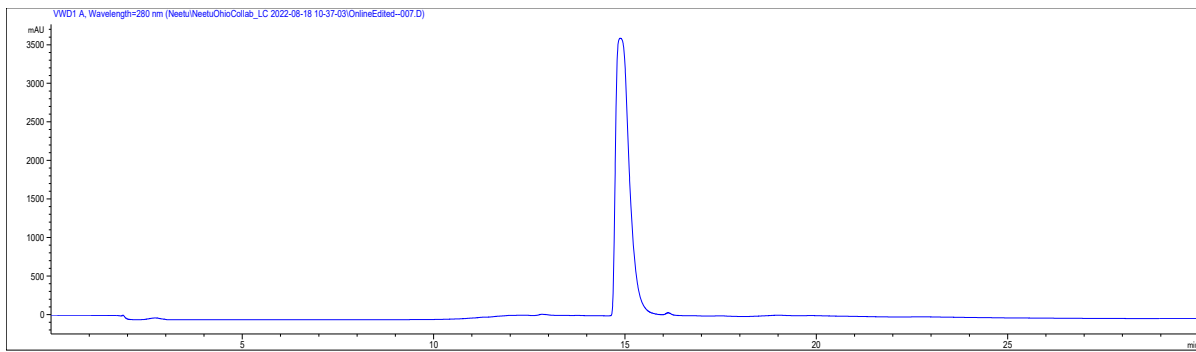

**Compound HSL211**

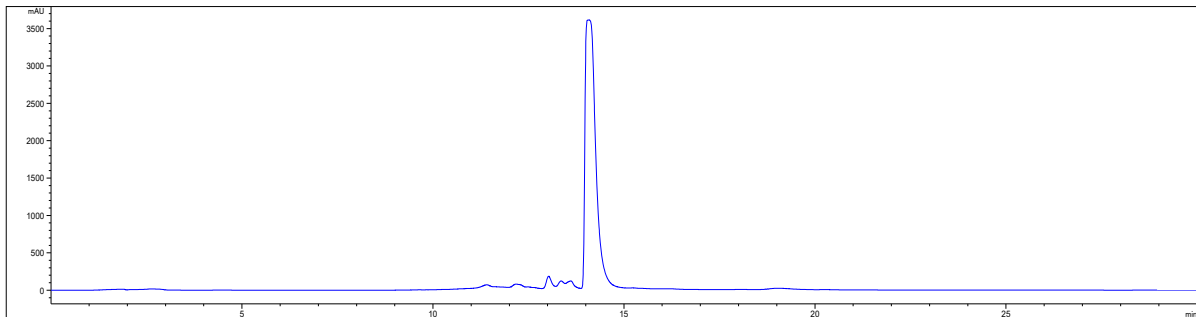

**Compound HSL468**

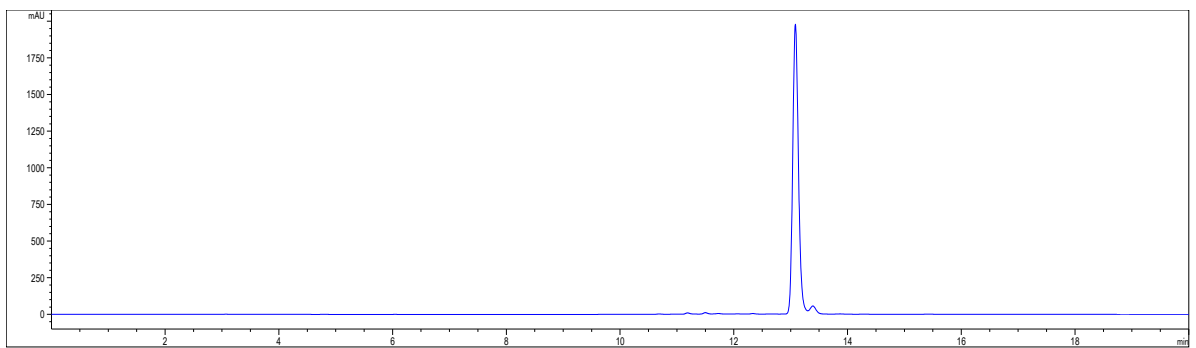

**Compound HSL212**

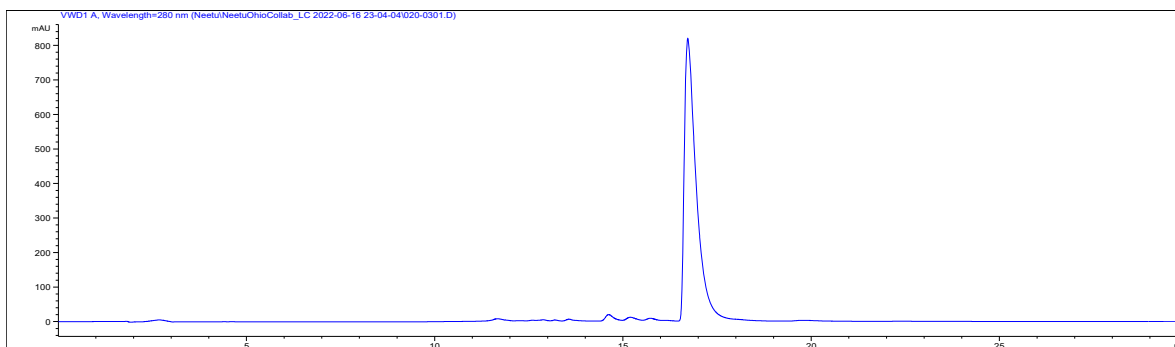

### Compound HSN431

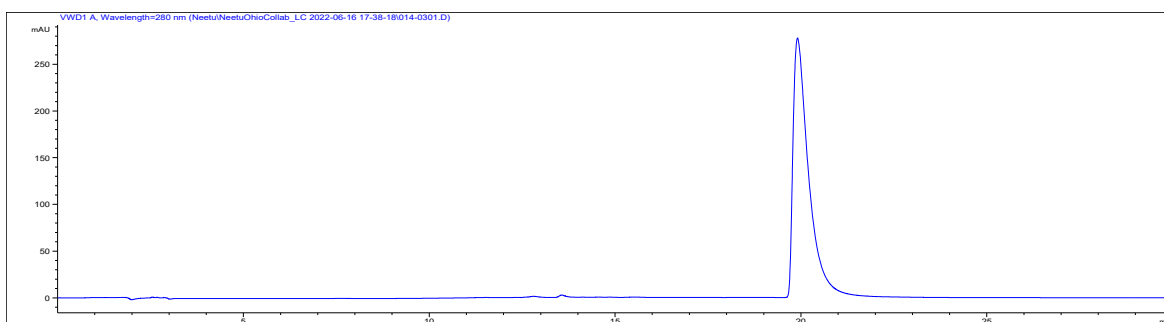

### Compound HSN576

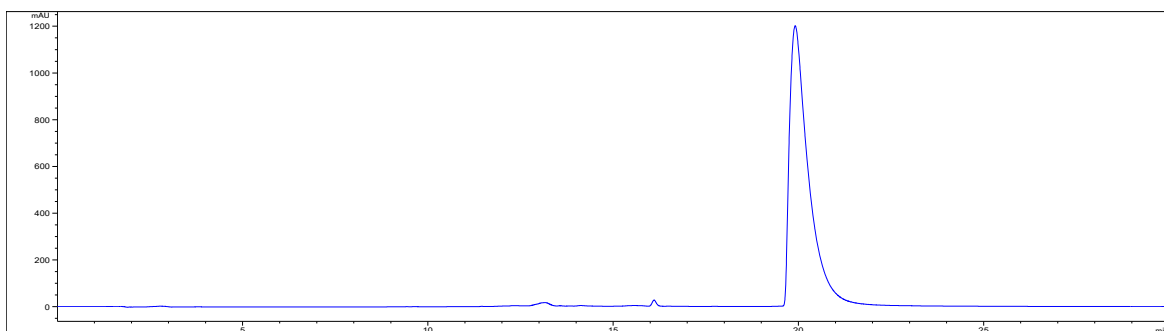

### Compound HSN580

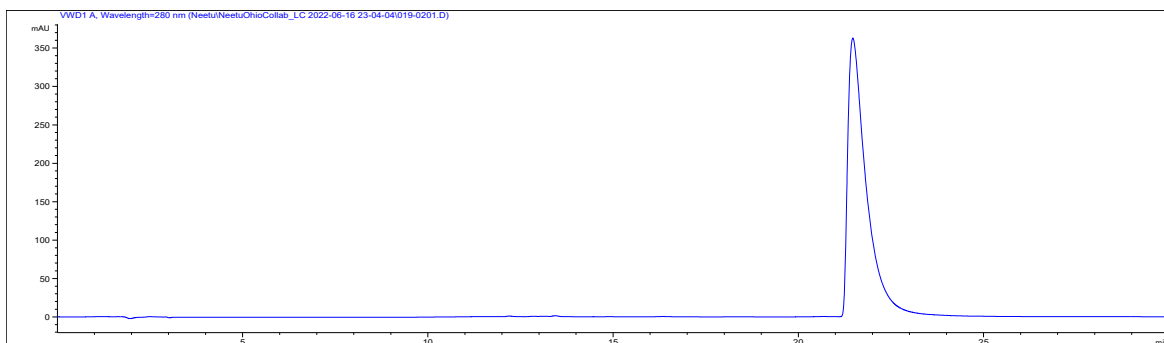

### Compound HSN692

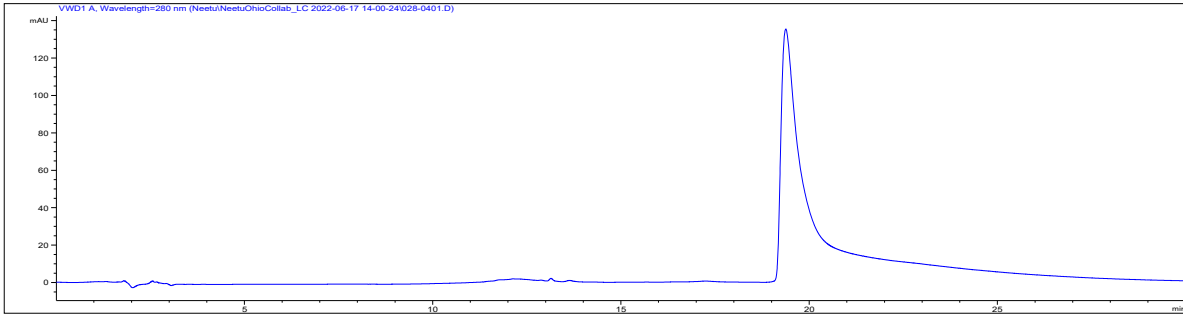

### Compound HSN700

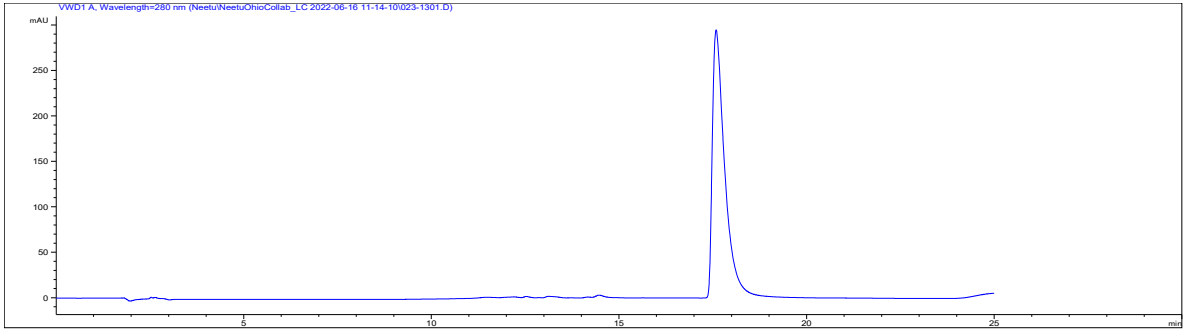

### Compound HSN744

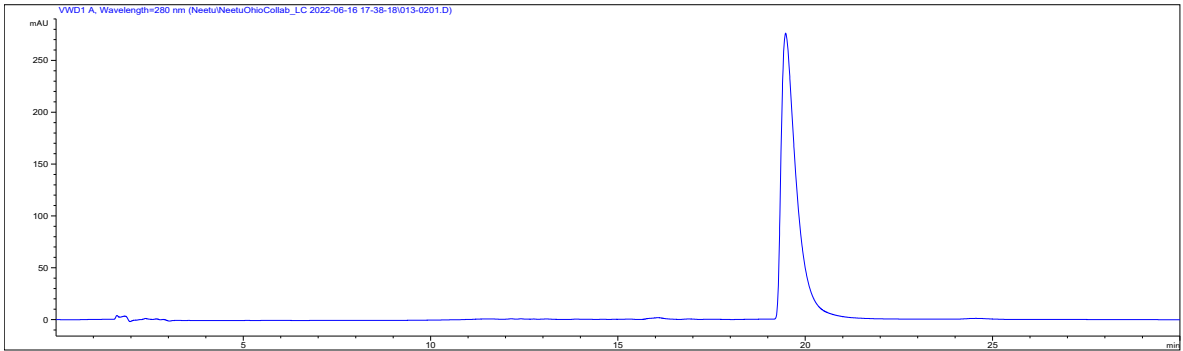

### Compound HSN789

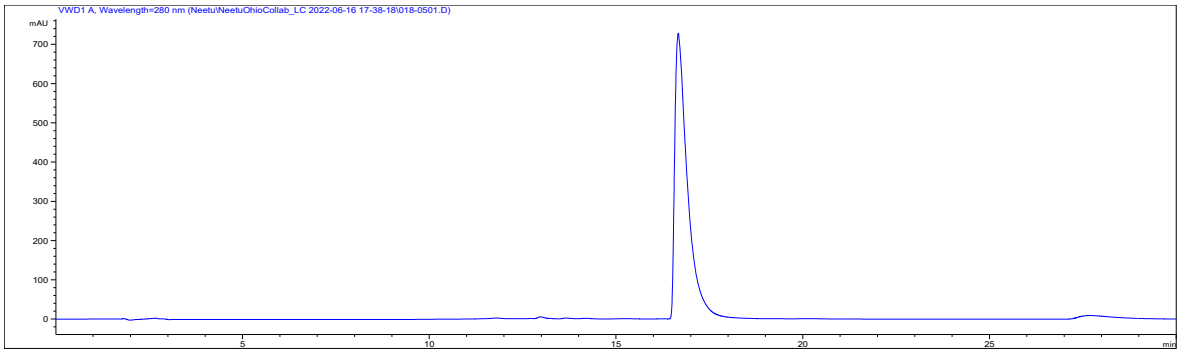



Fig. S1. <sup>1</sup>H and <sup>13</sup>C Spectras

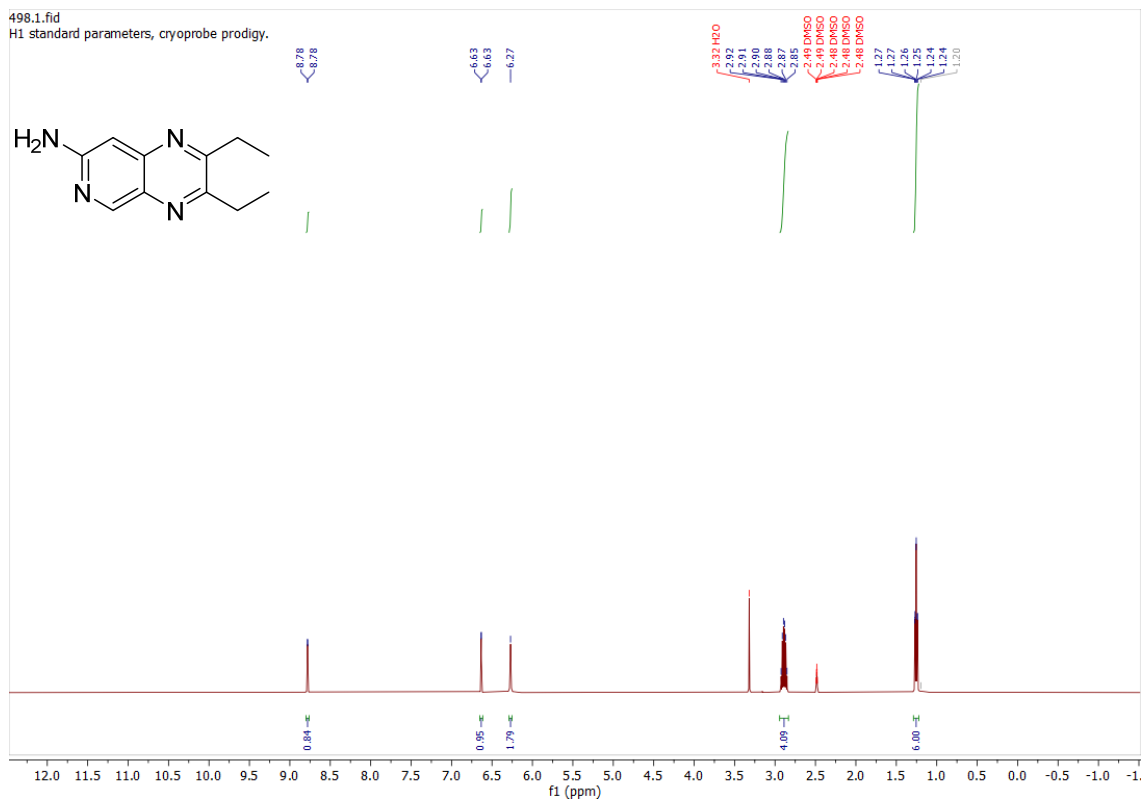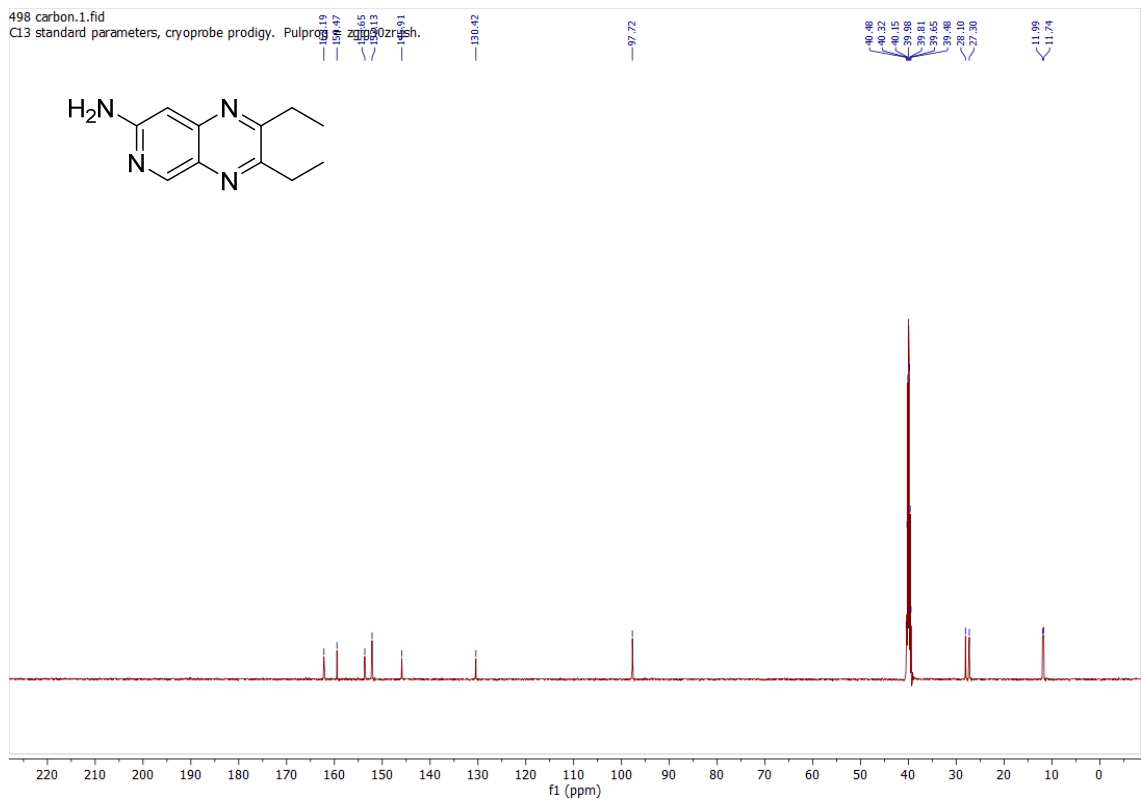

501.1.fid  
 H1 standard parameters, cryoprobe prodigy.

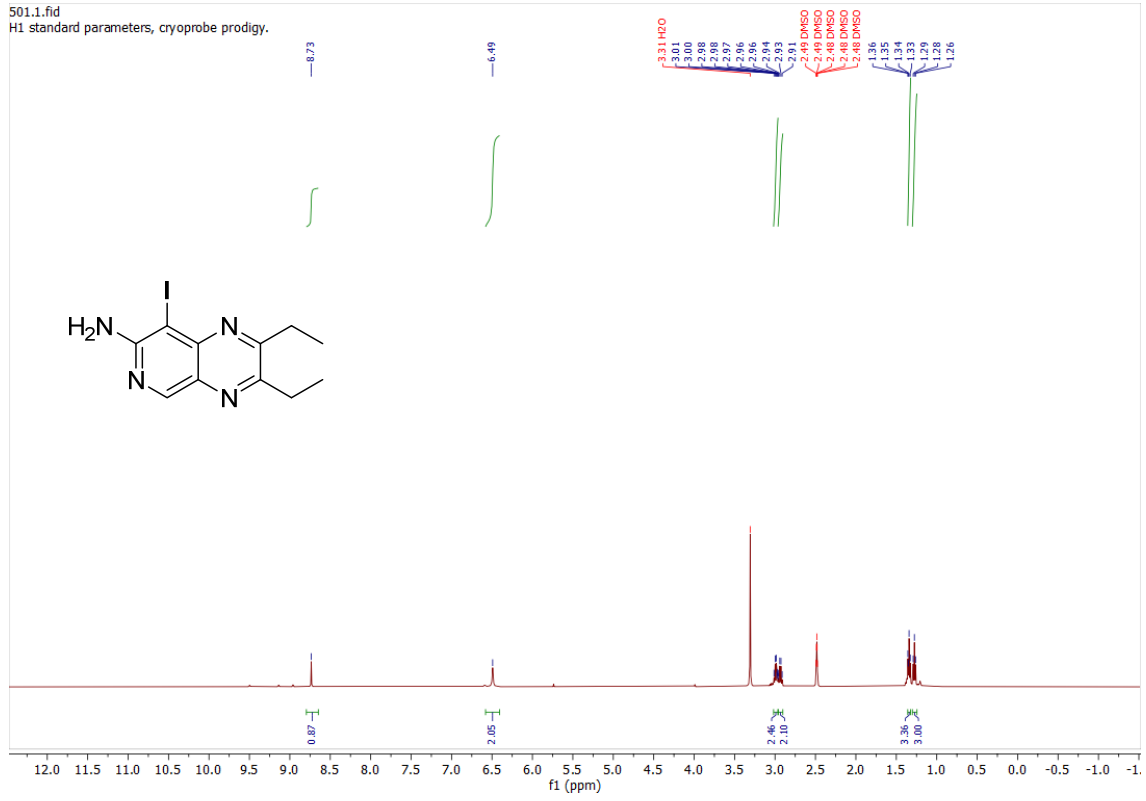

501carbon.1.fid  
 C13 standard parameters, cryoprobe prodigy. Pulprog 302r.ash.

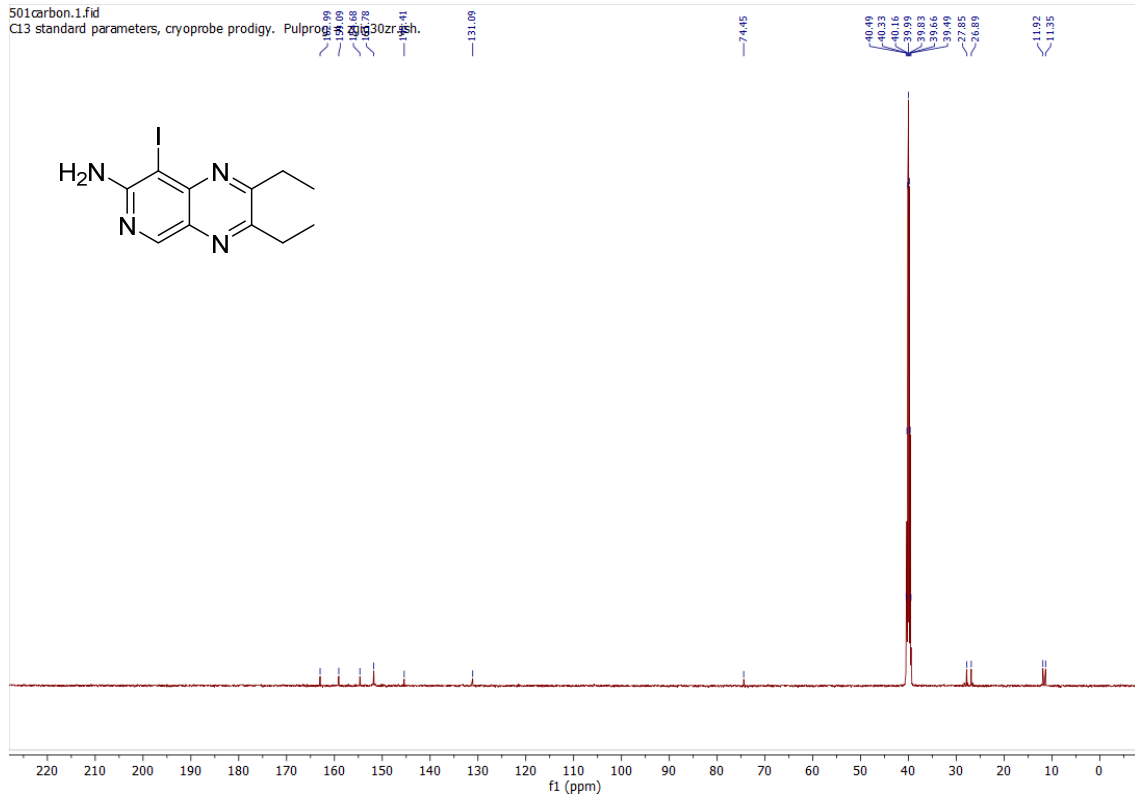



523.1.fid  
H1 standard parameters, cryoprobe prodigy.

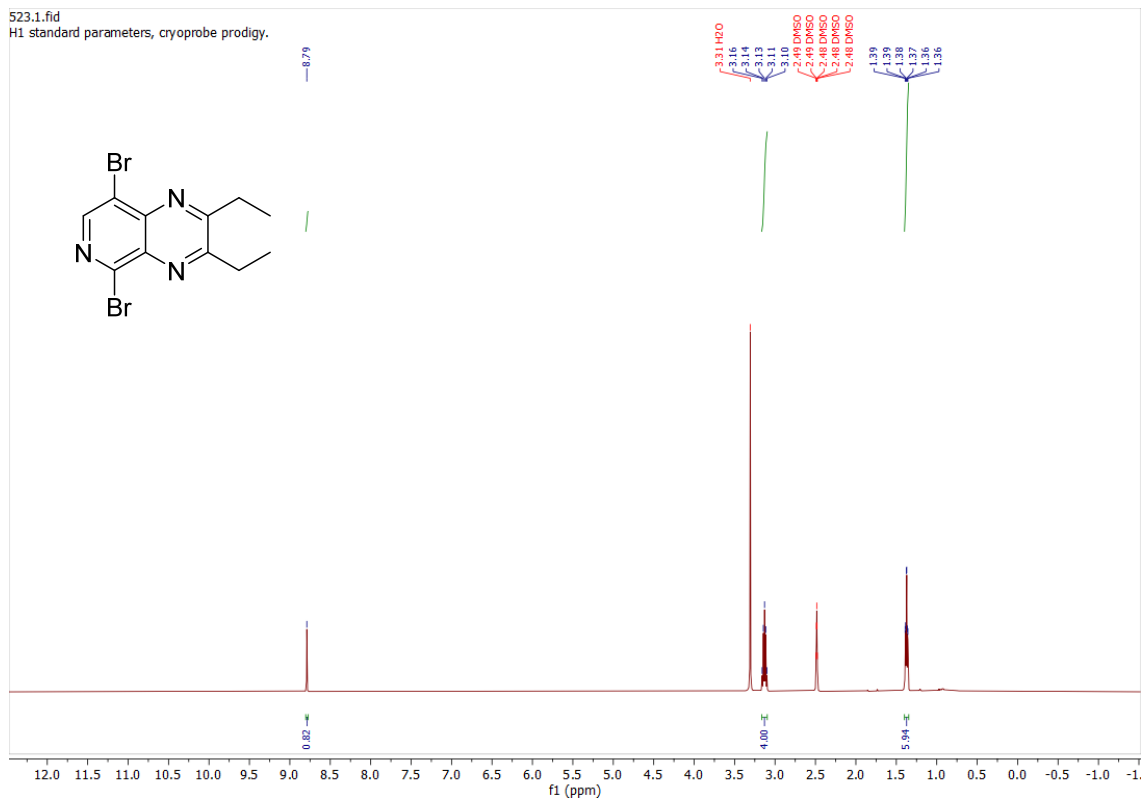

523carbon.1.fid  
C13 standard parameters, cryoprobe prodigy.

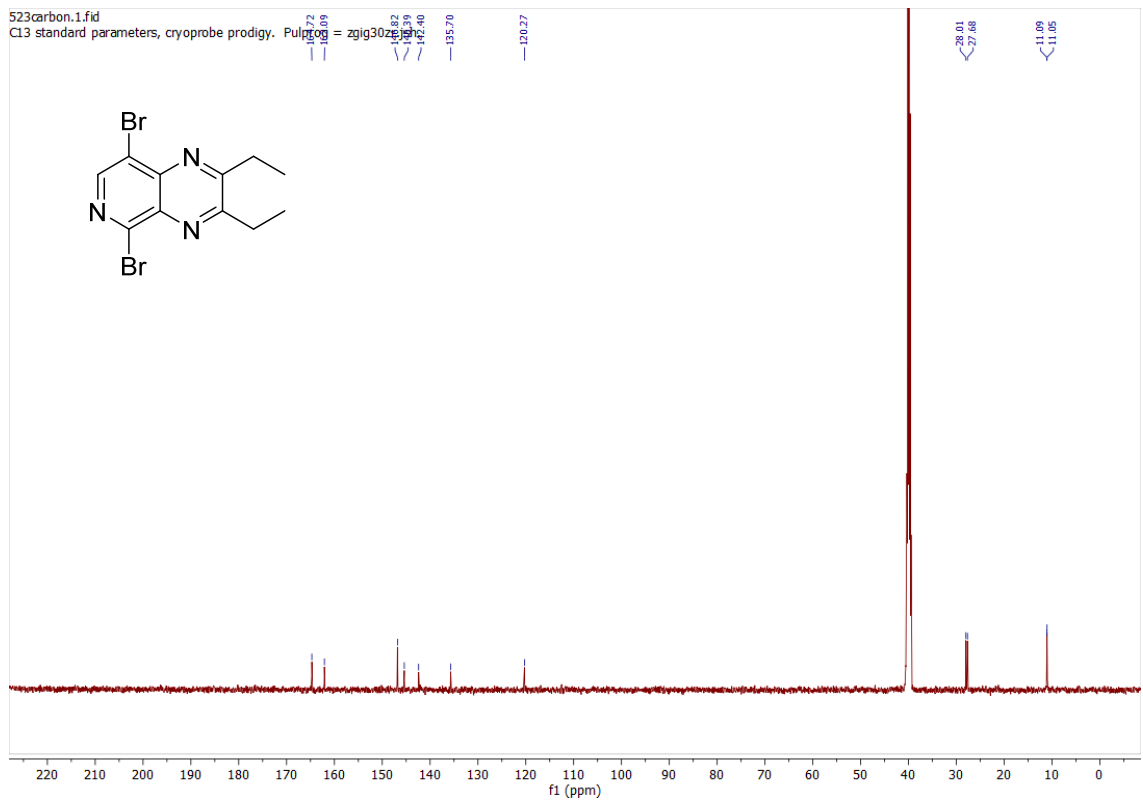

ndayal15.2.1.fid

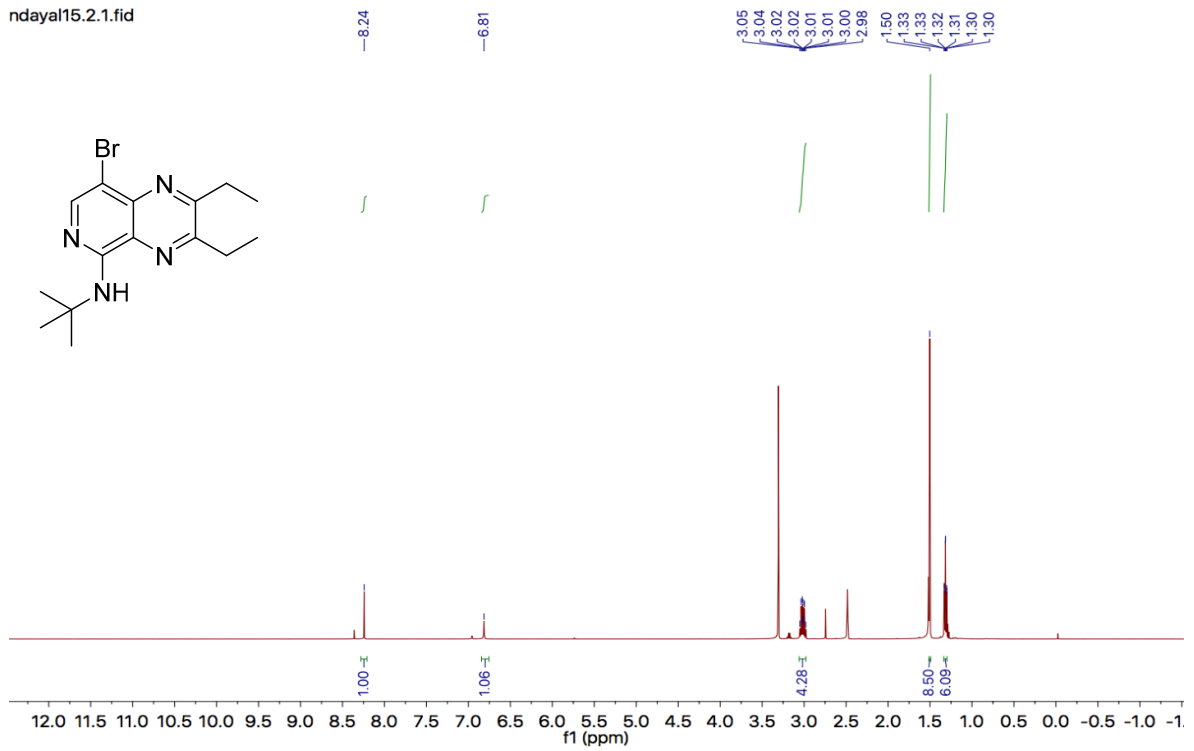

ndayal15.2.2.fid

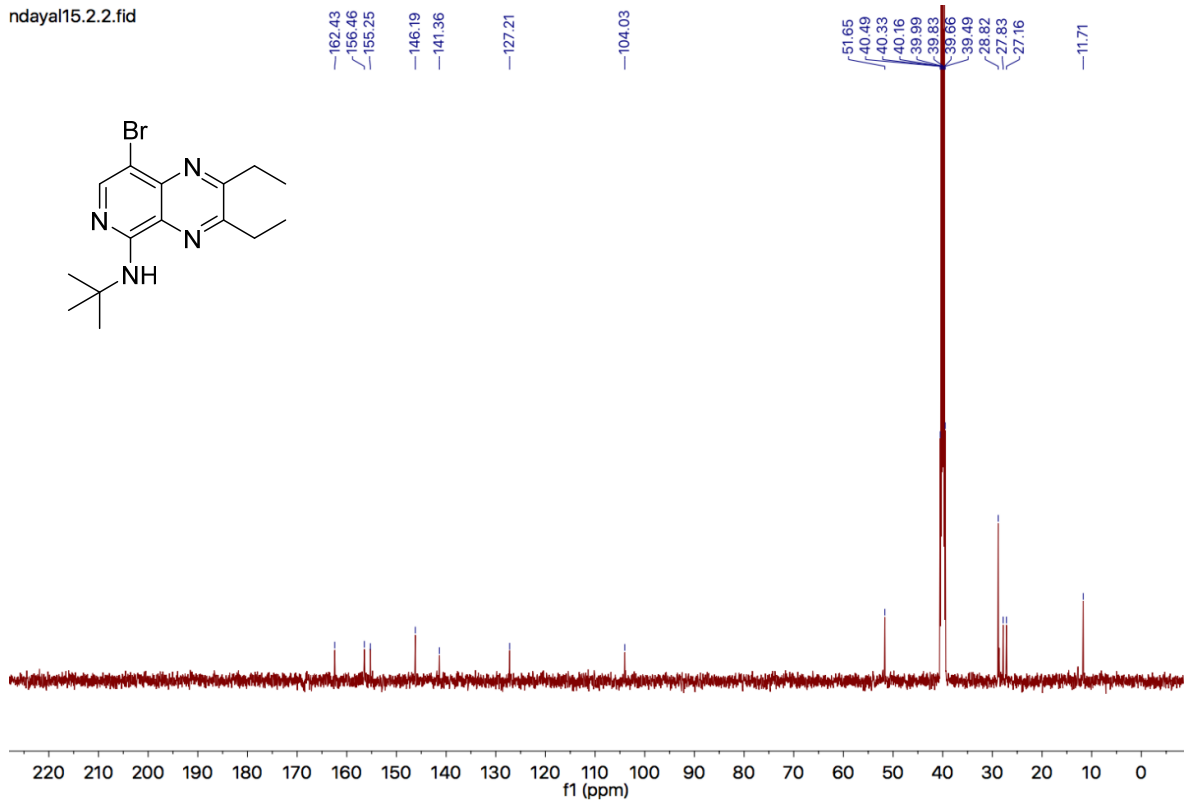

545.1.fid  
H1 standard parameters, cryoprobe prodigy.

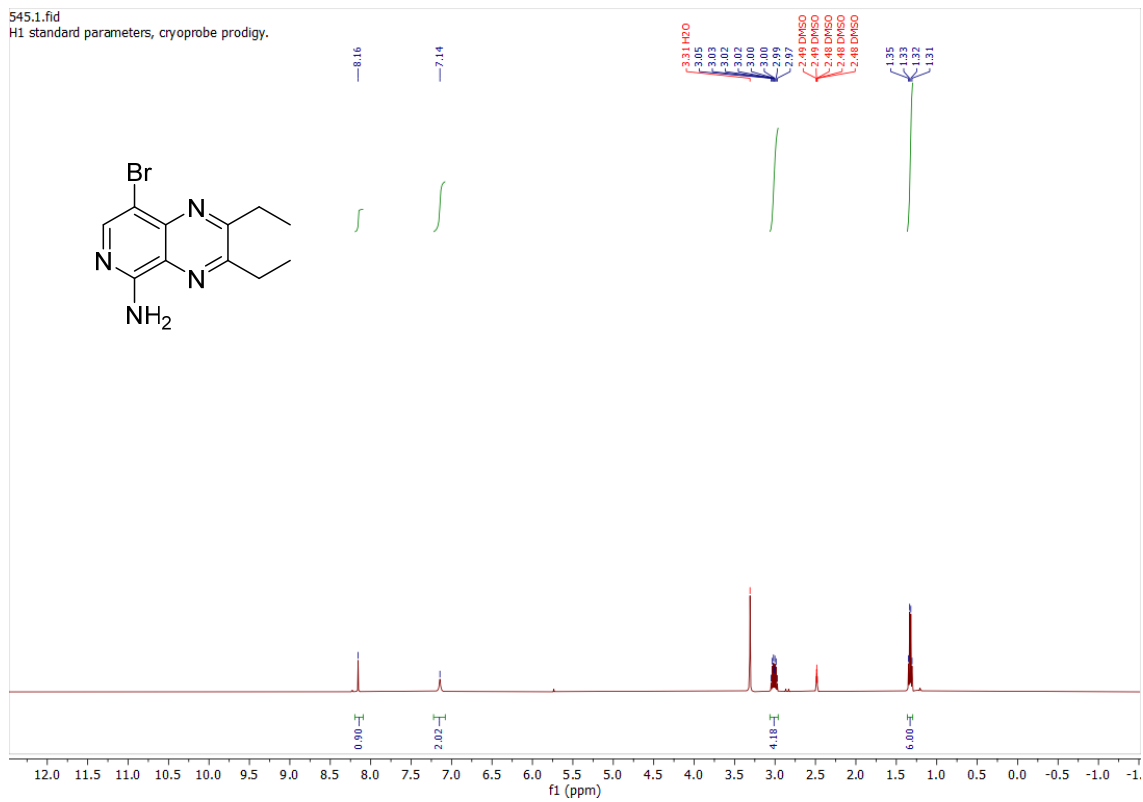

545carbon.1.fid  
C13 standard parameters, cryoprobe prodigy. Pulprogig30z

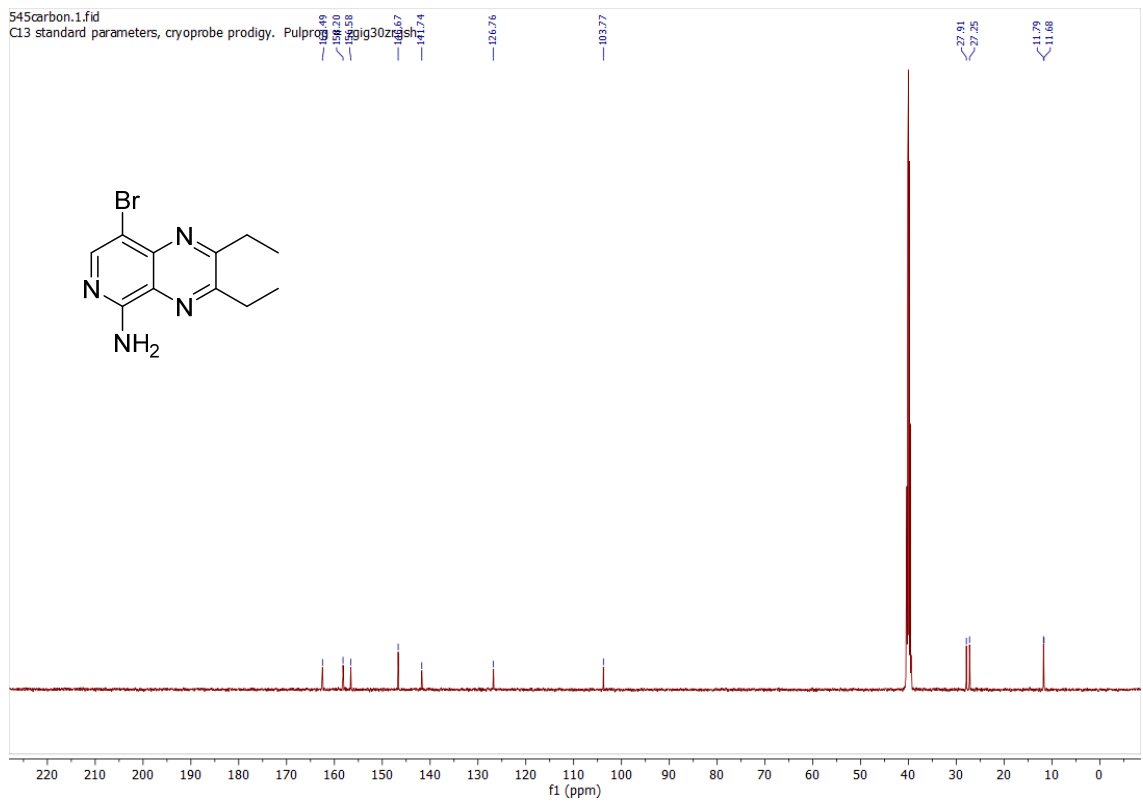

hsnd15r.1.fid

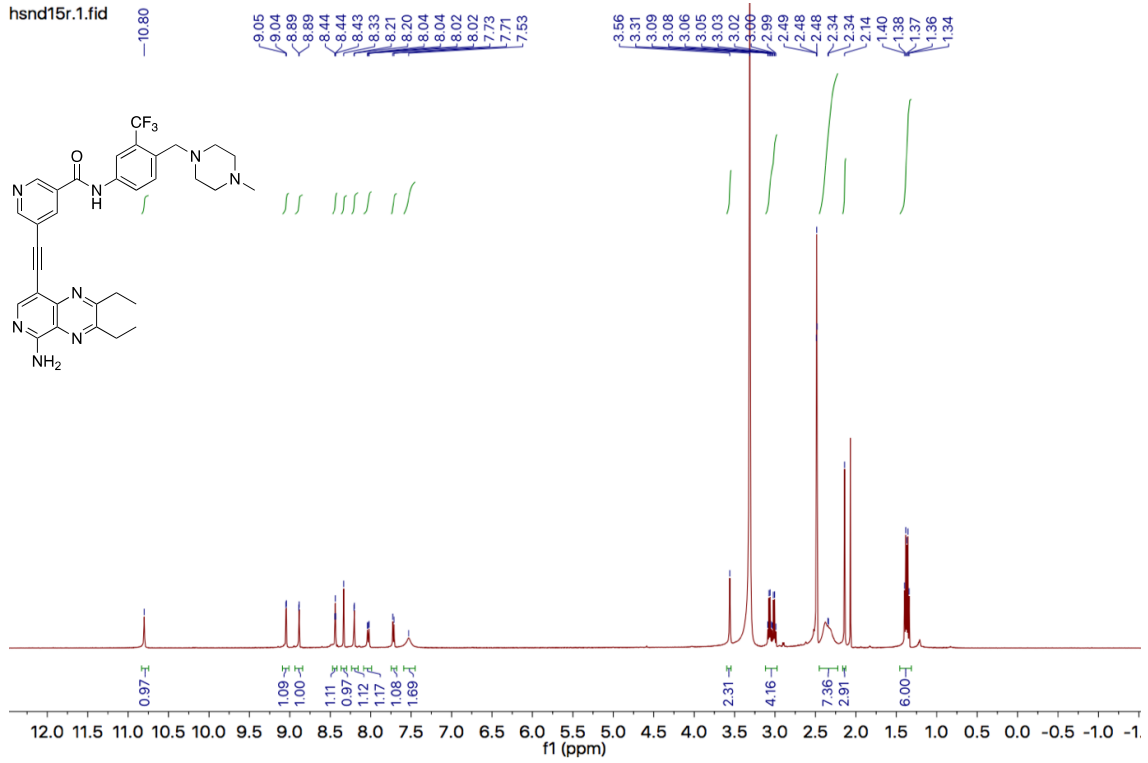

hsnd15r.2.fid

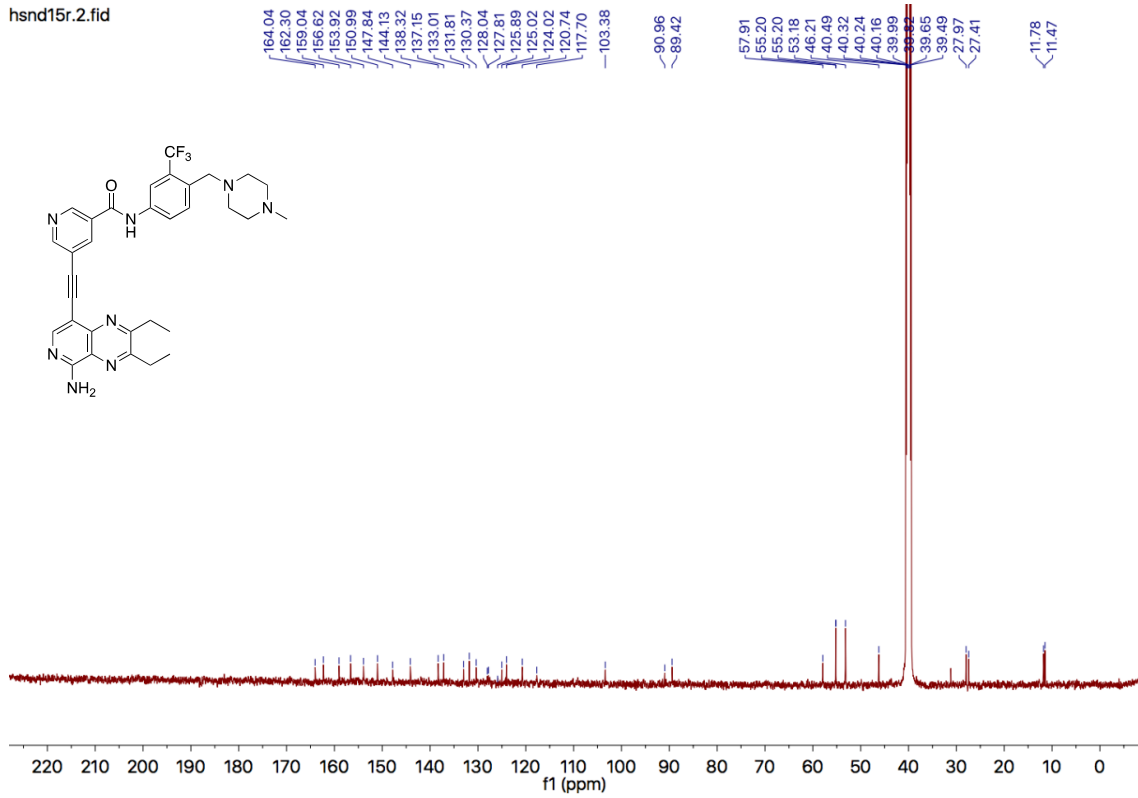

hsnd17.1.fid

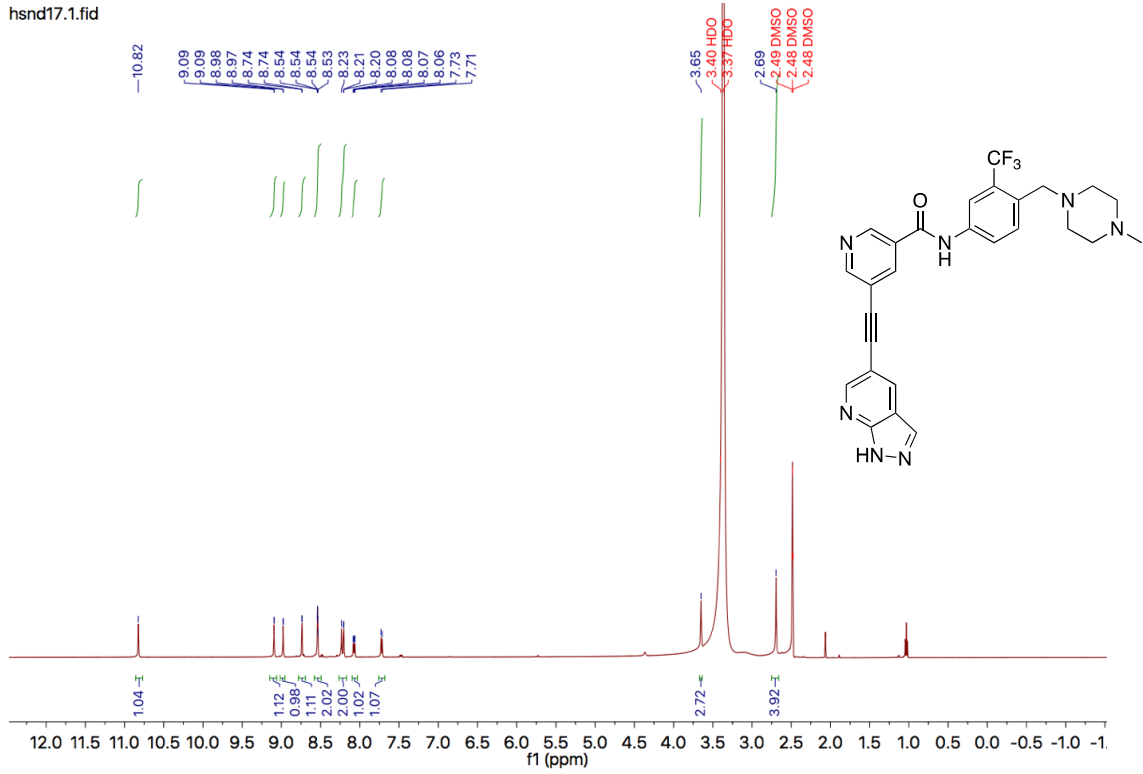

hsnd17.2.fid

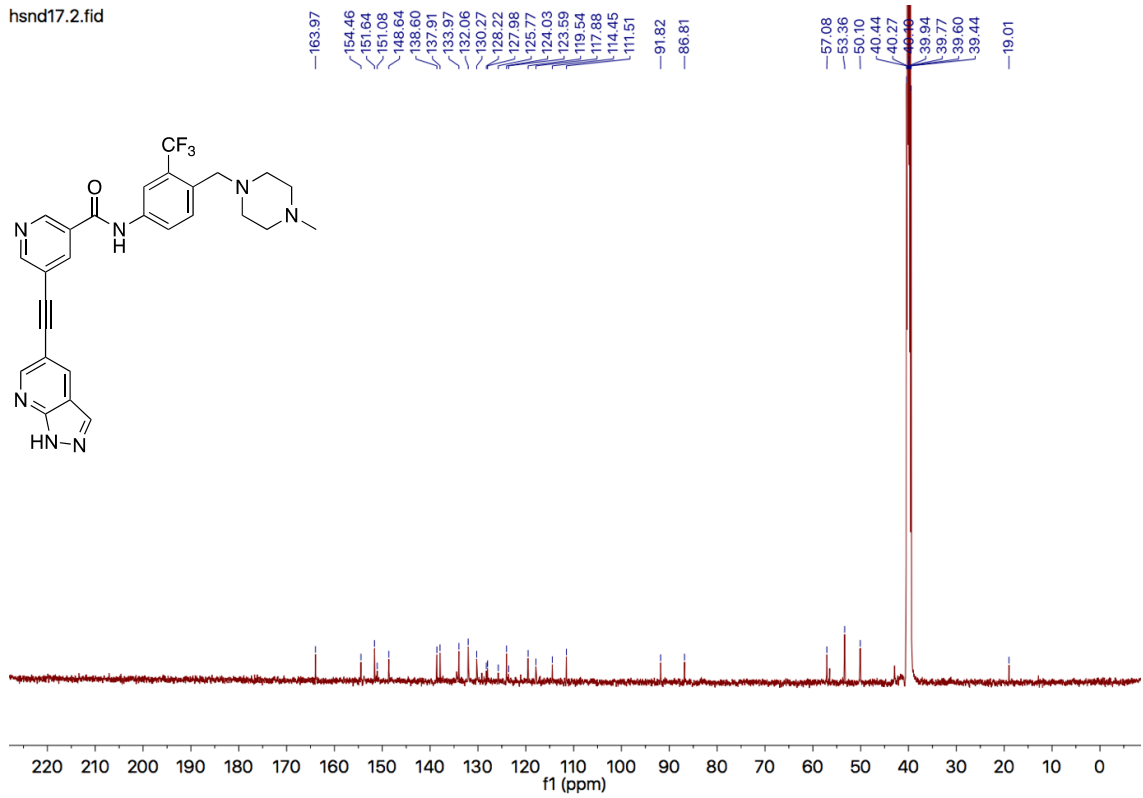



522 02192020.1.fid  
H1 standard parameters, cryoprobe prodigy.

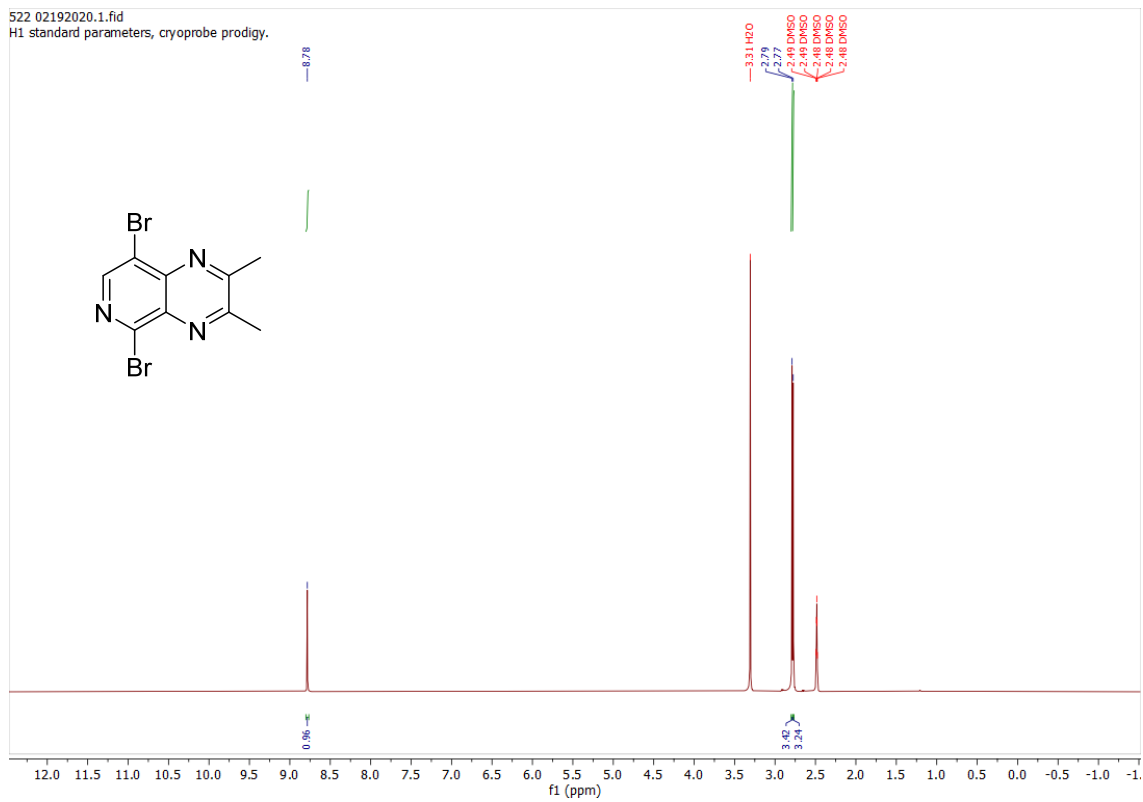

522 02192020.1.fid  
H1 standard parameters, cryoprobe prodigy.

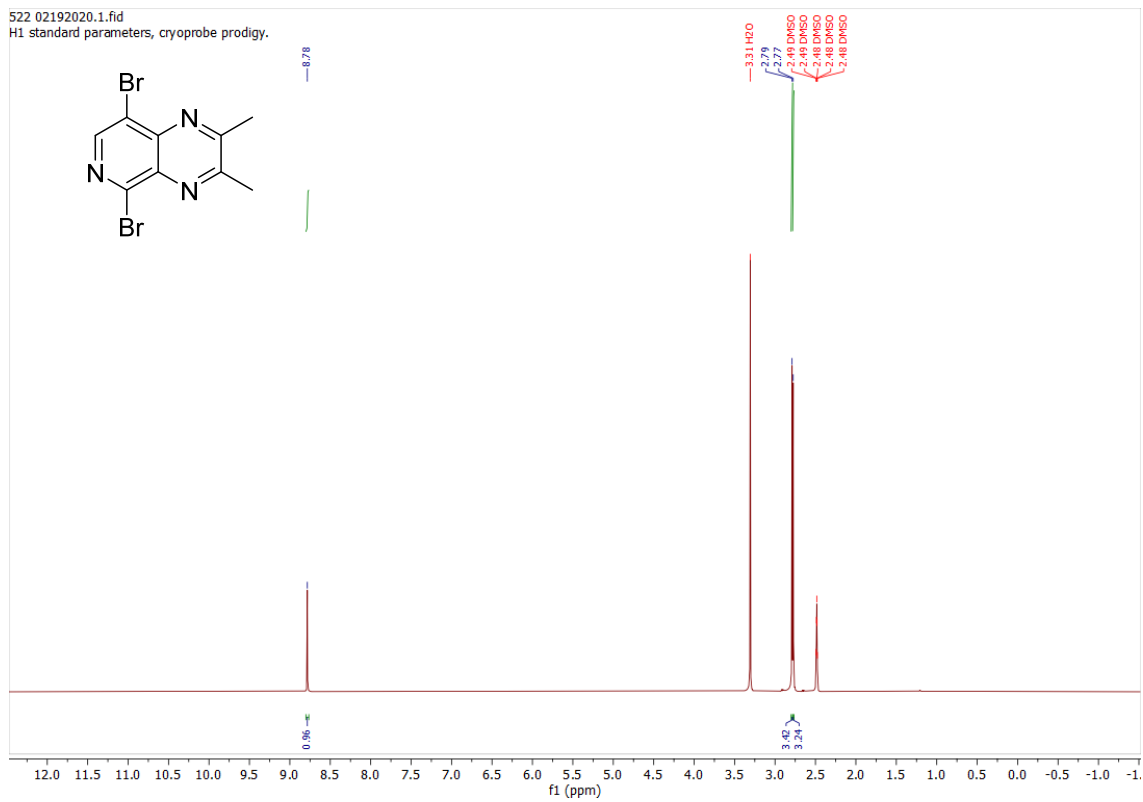

525.1.fid  
H1 standard parameters, cryoprobe prodigy.

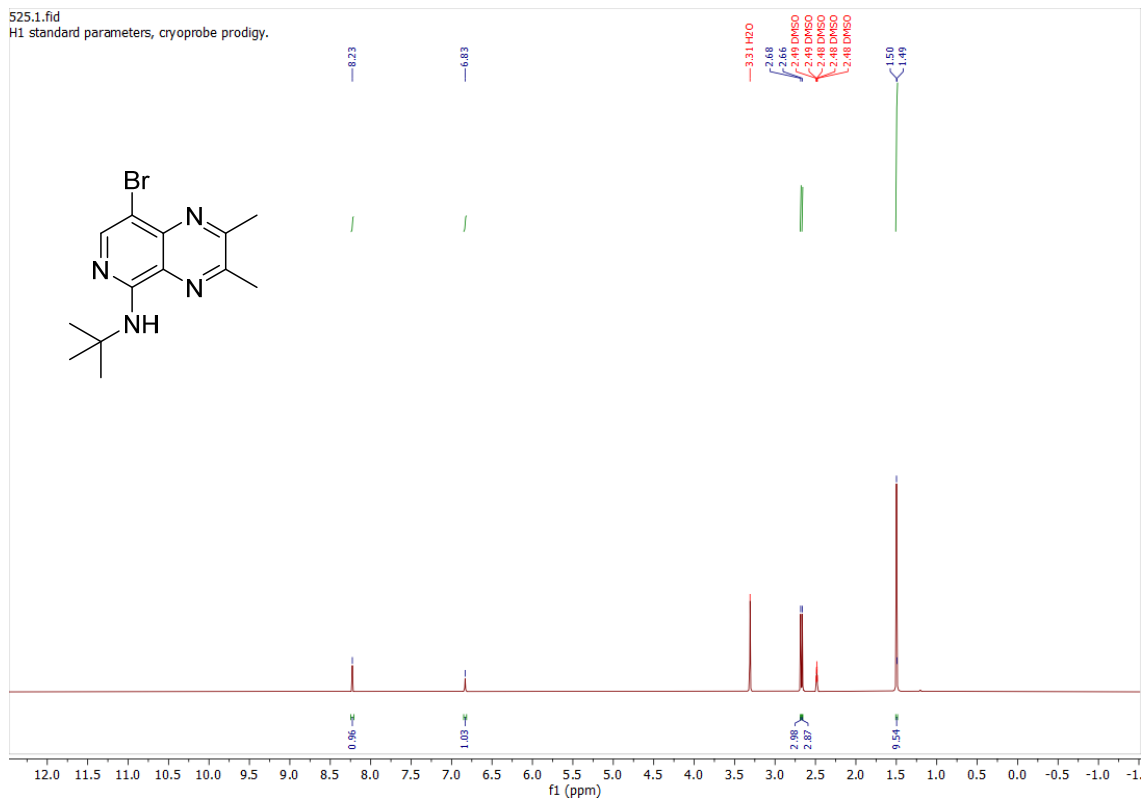

525carbon.1.fid  
C13 standard parameters, cryoprobe prodigy. Pulprog

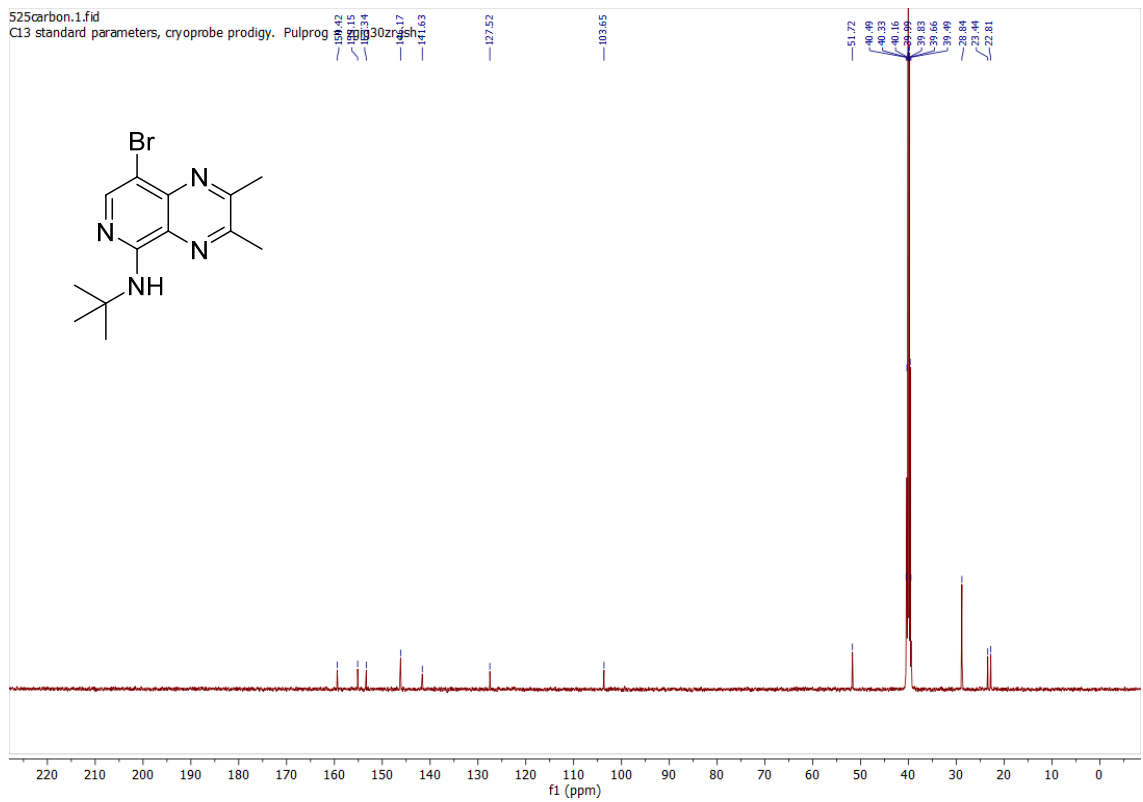

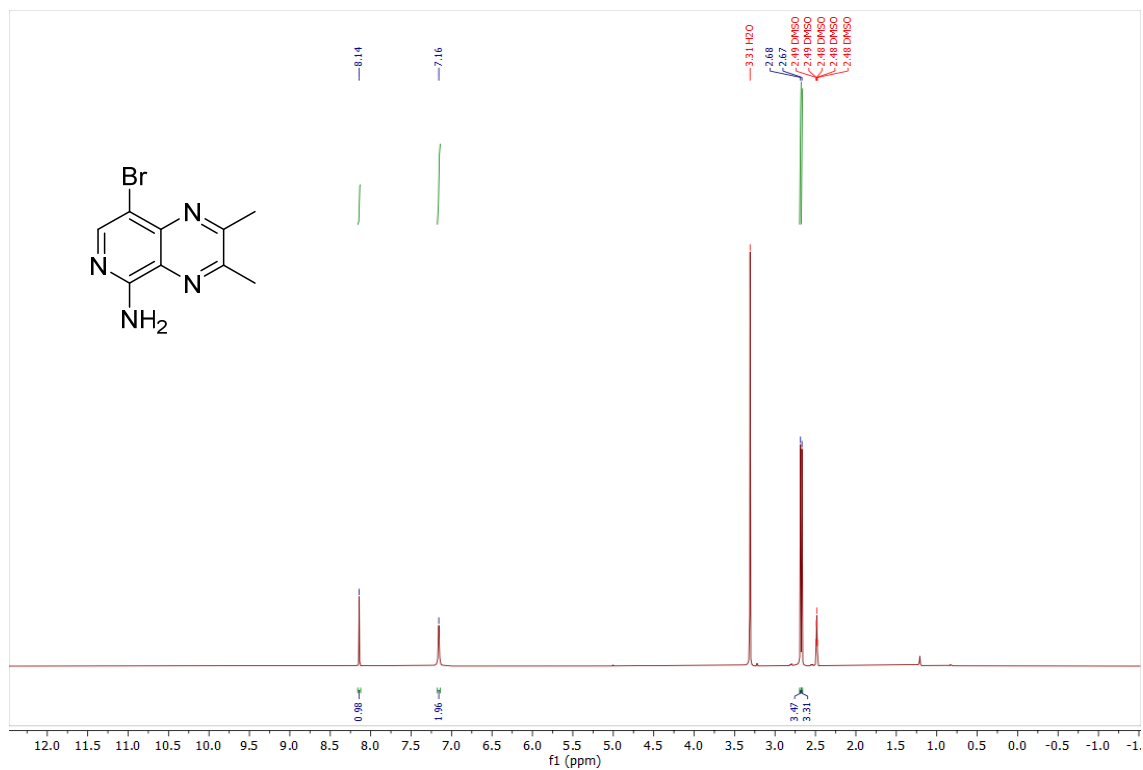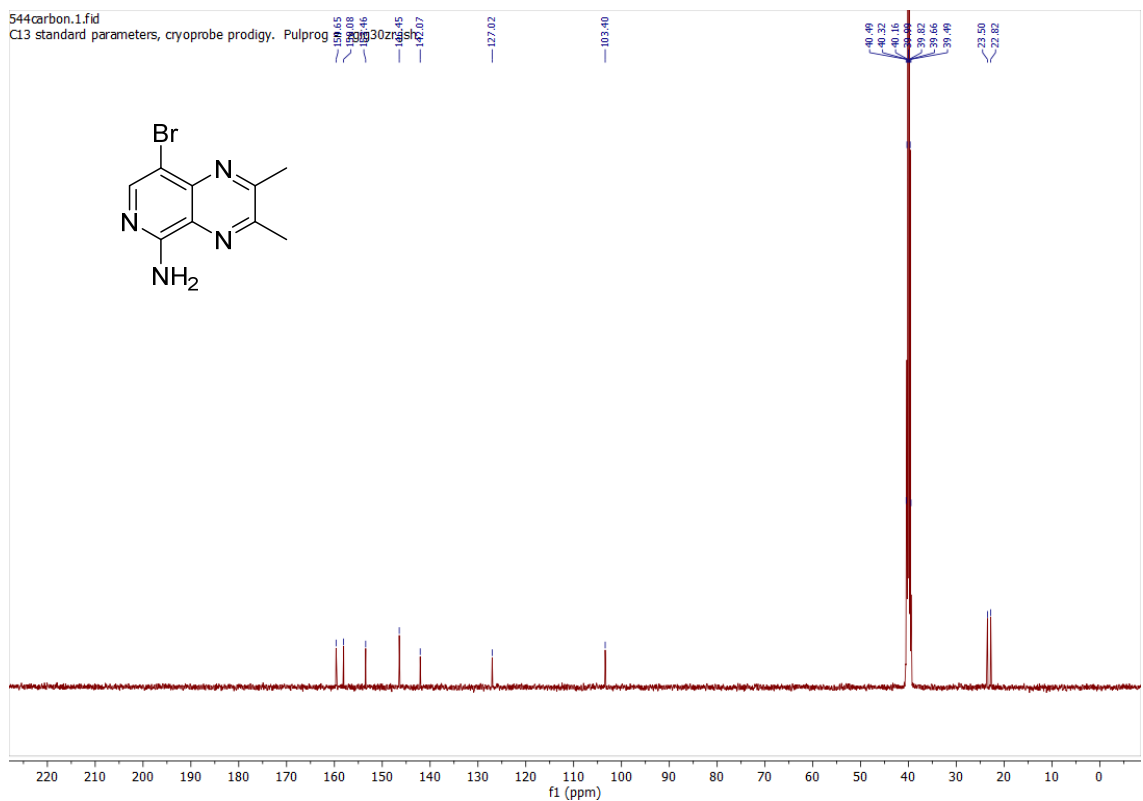

hsnd16r.1.fid

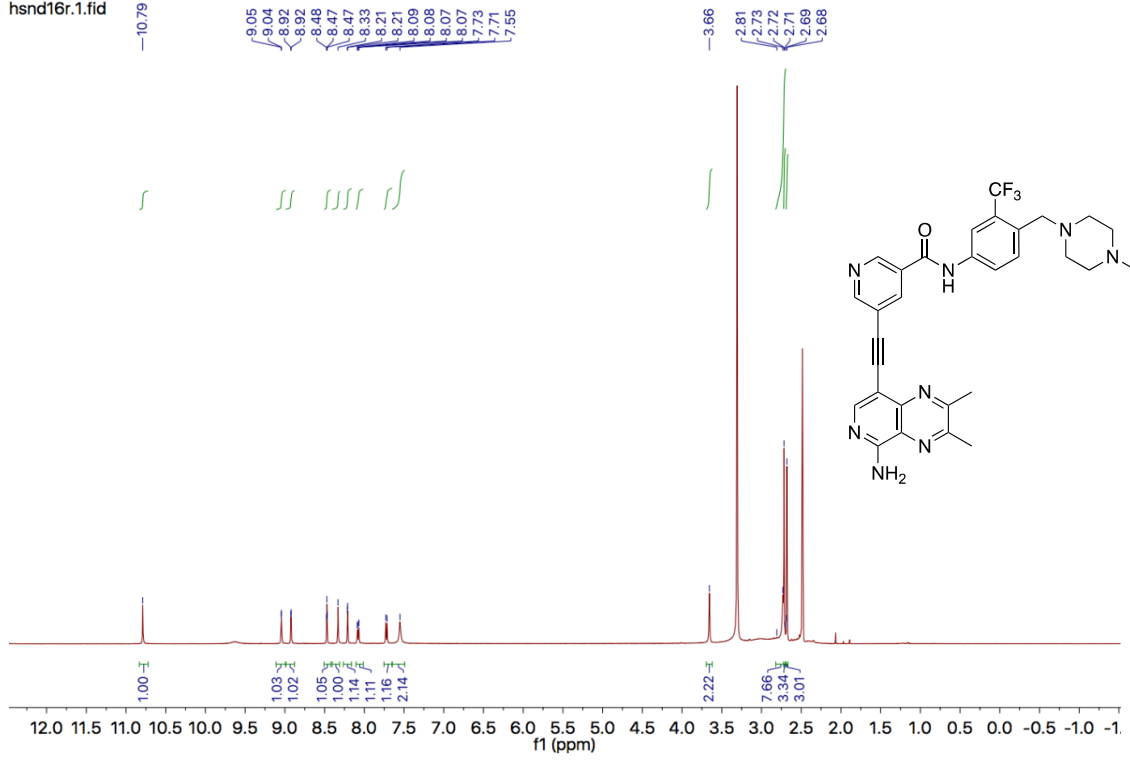

hsnd16r.2.fid

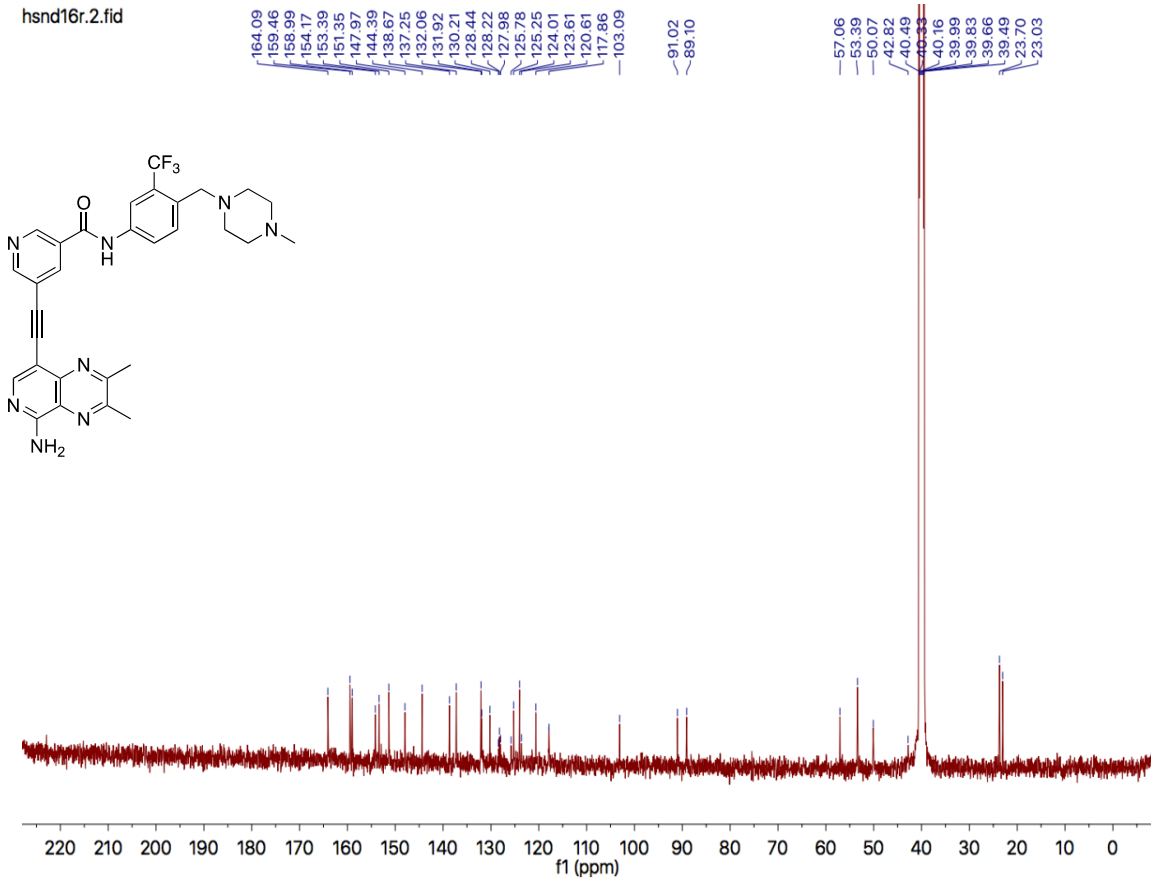

ndayal-476s1.1.fid

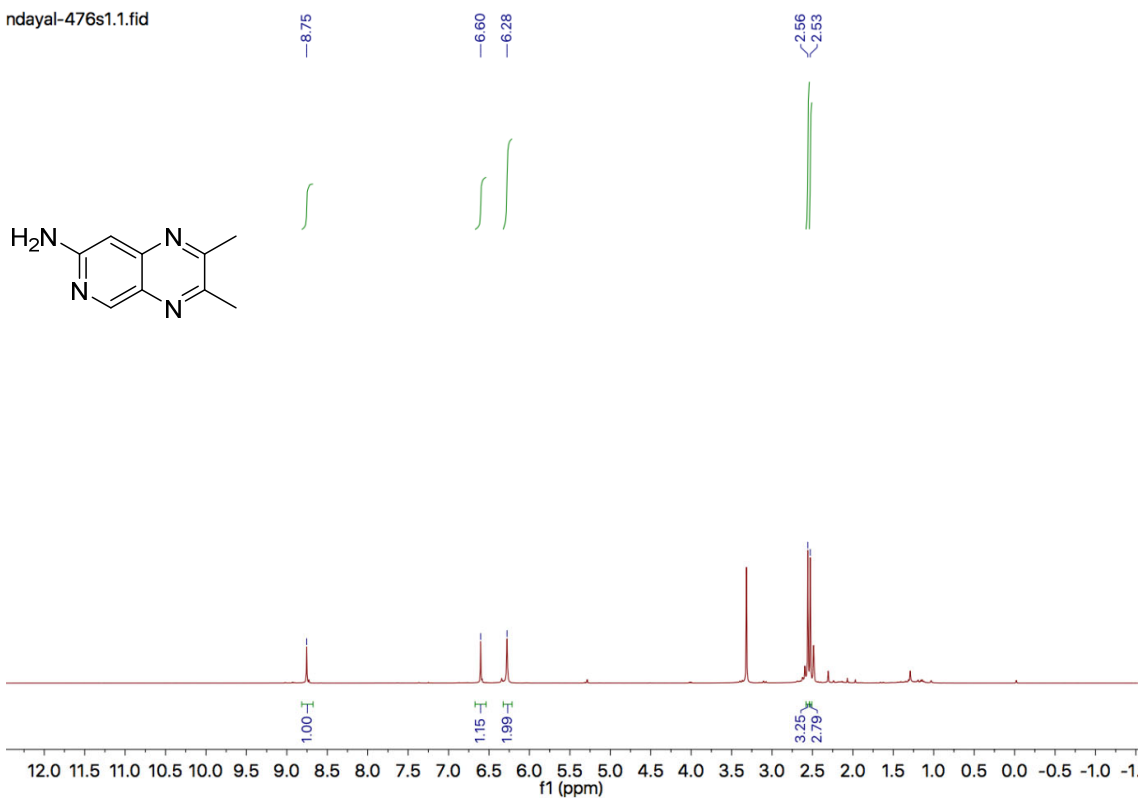

ndayal-476s1.2.fid

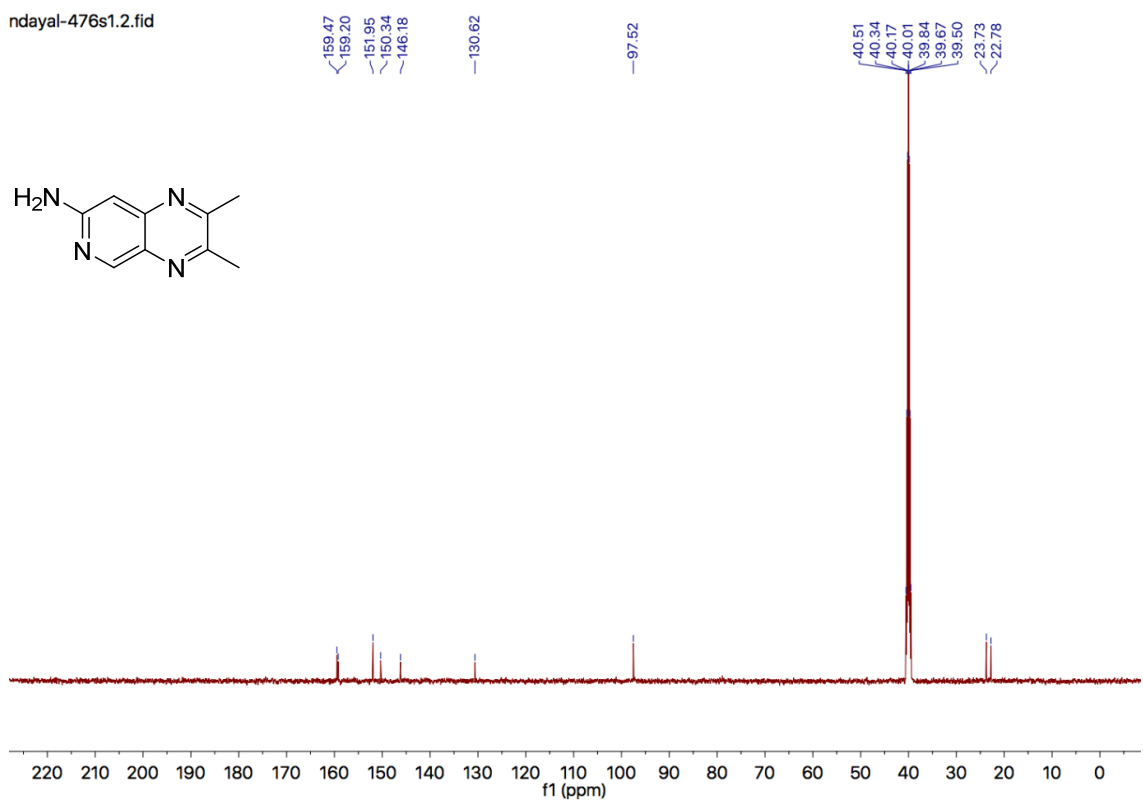

ndayal-476IS.1.fid

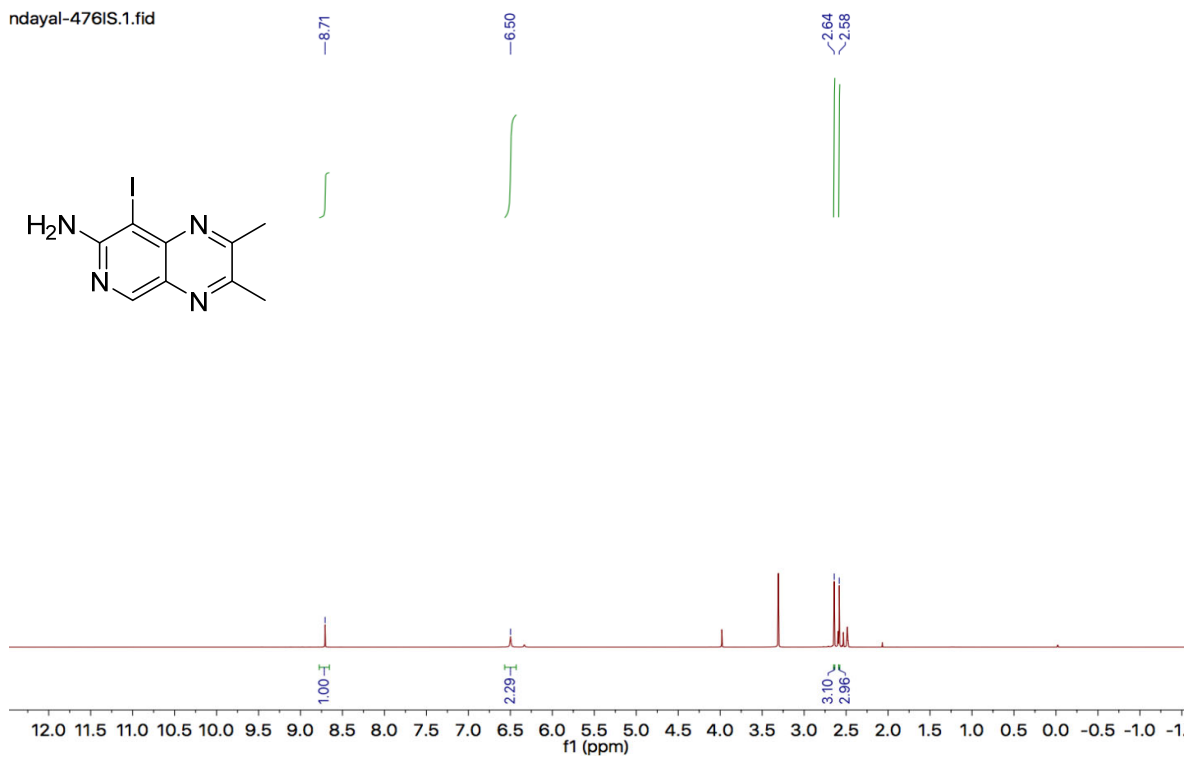

ndayal-476IS 2.2.fid

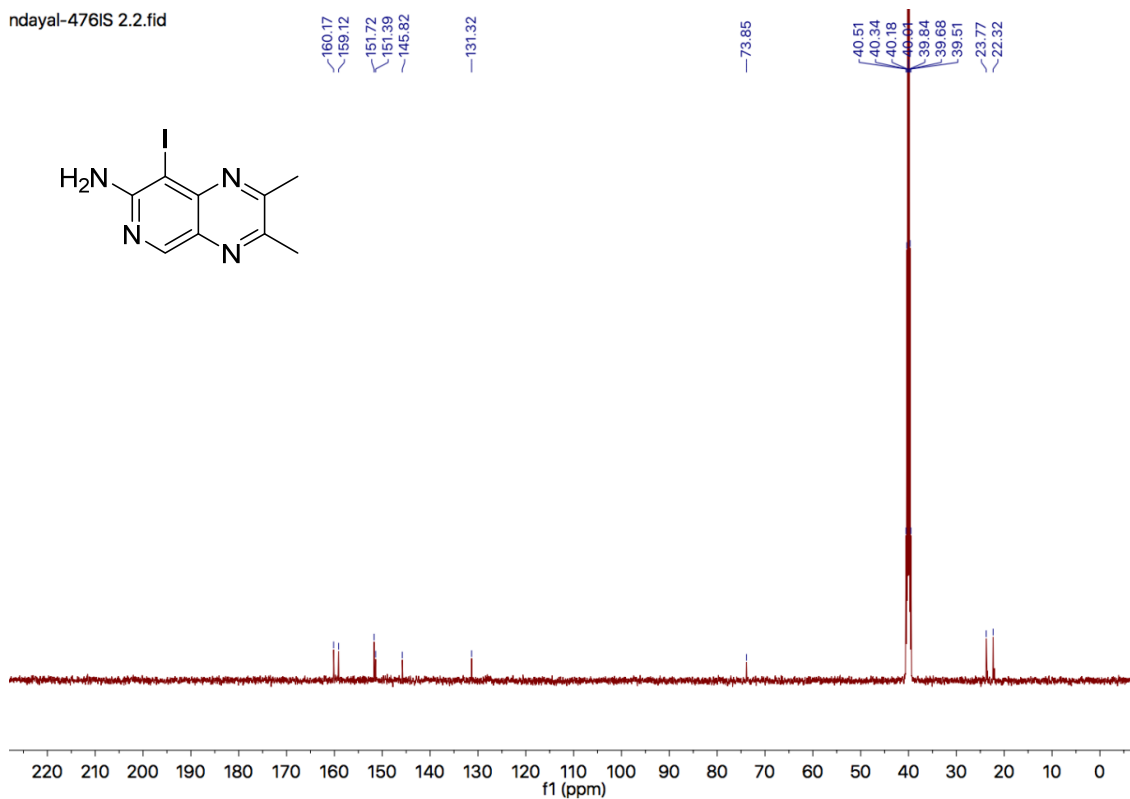

ndayal-476n.1.fid

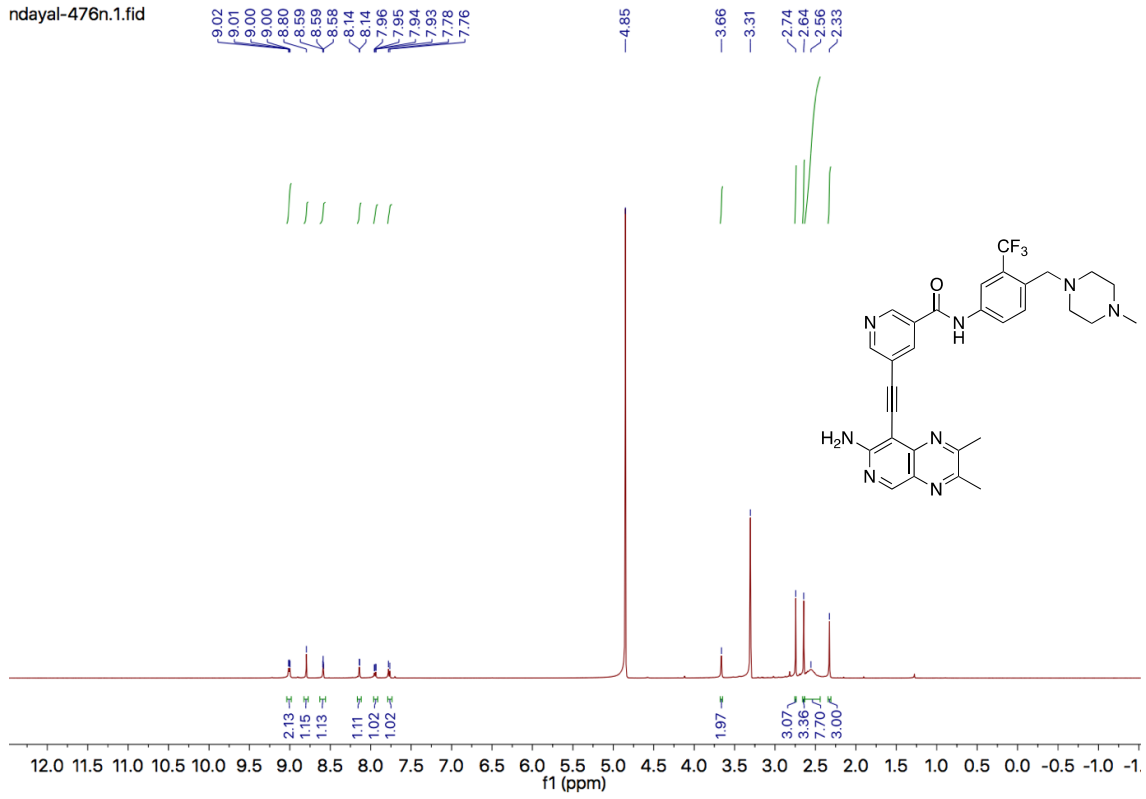

ndayal-476n.2.fid

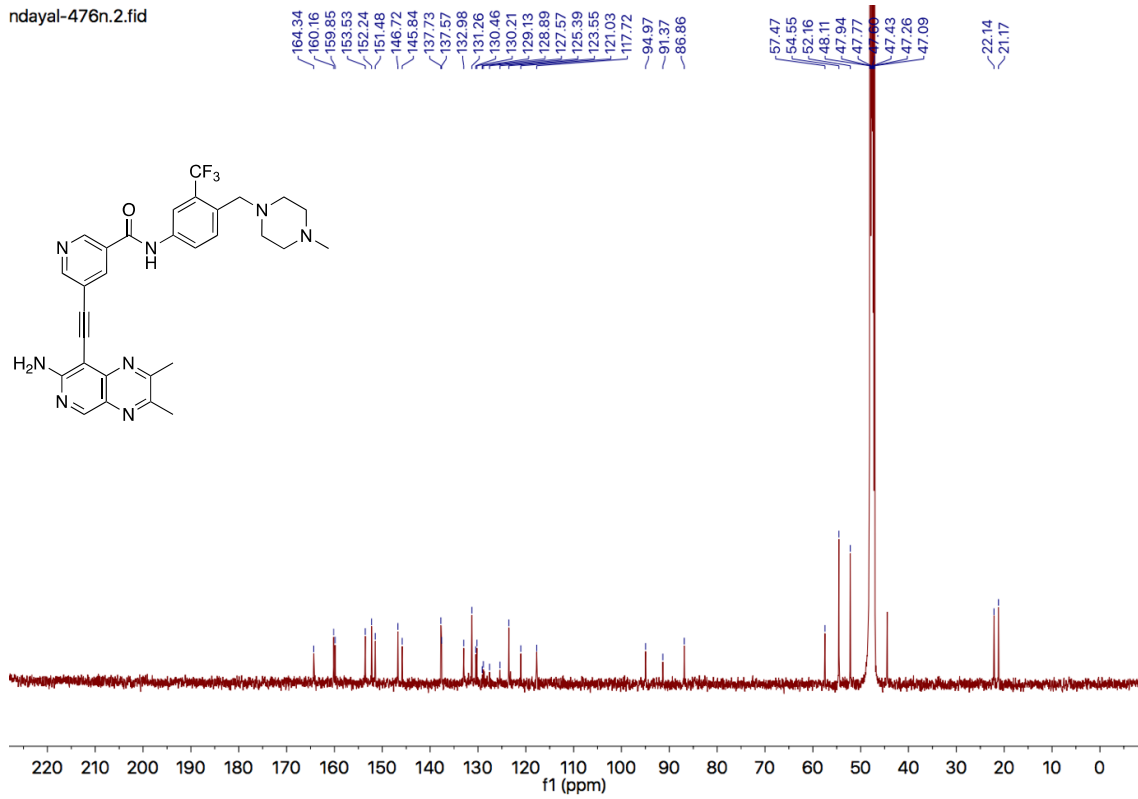

HSN638-A.1.fid  
H1 standard parameters, cryoprobe prodigy.

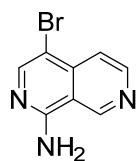

HSN638

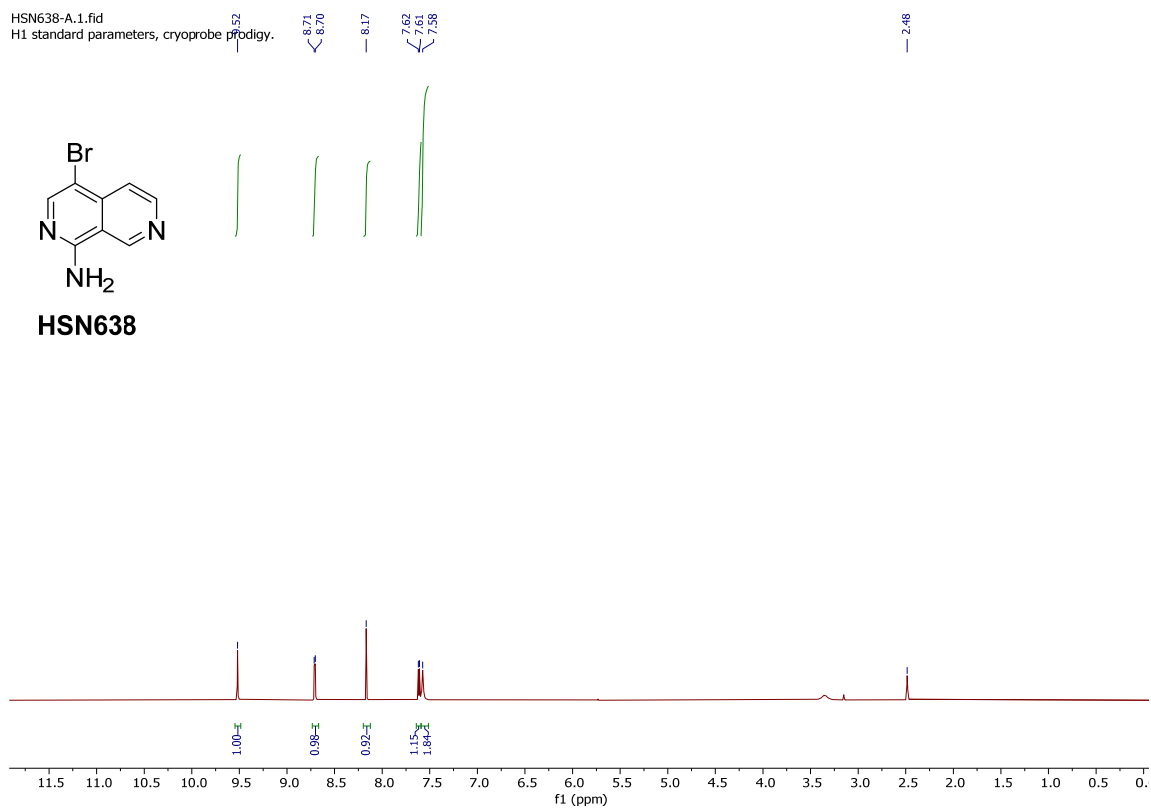

HSN638-A.2.fid  
C13 standard parameters, cryoprobe prodigy, log = 20, sig30zr.jsh.

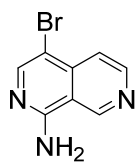

HSN638

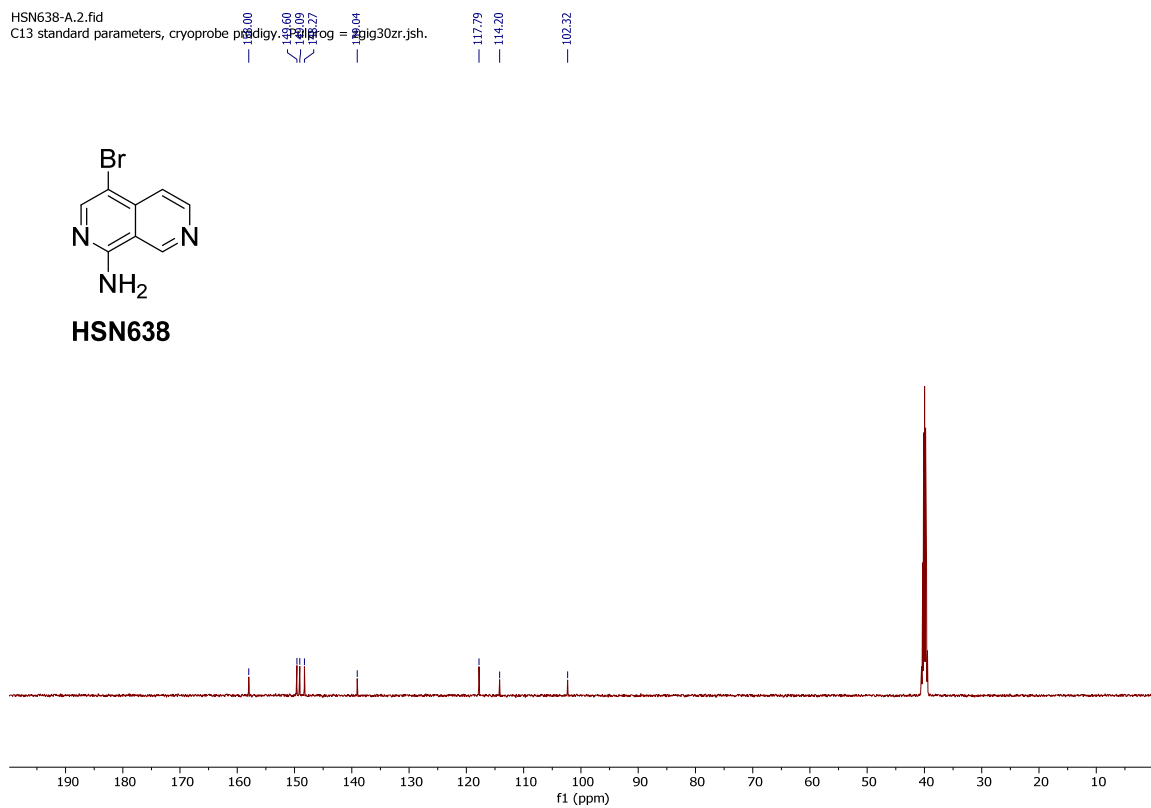



ndayal721.1.fid

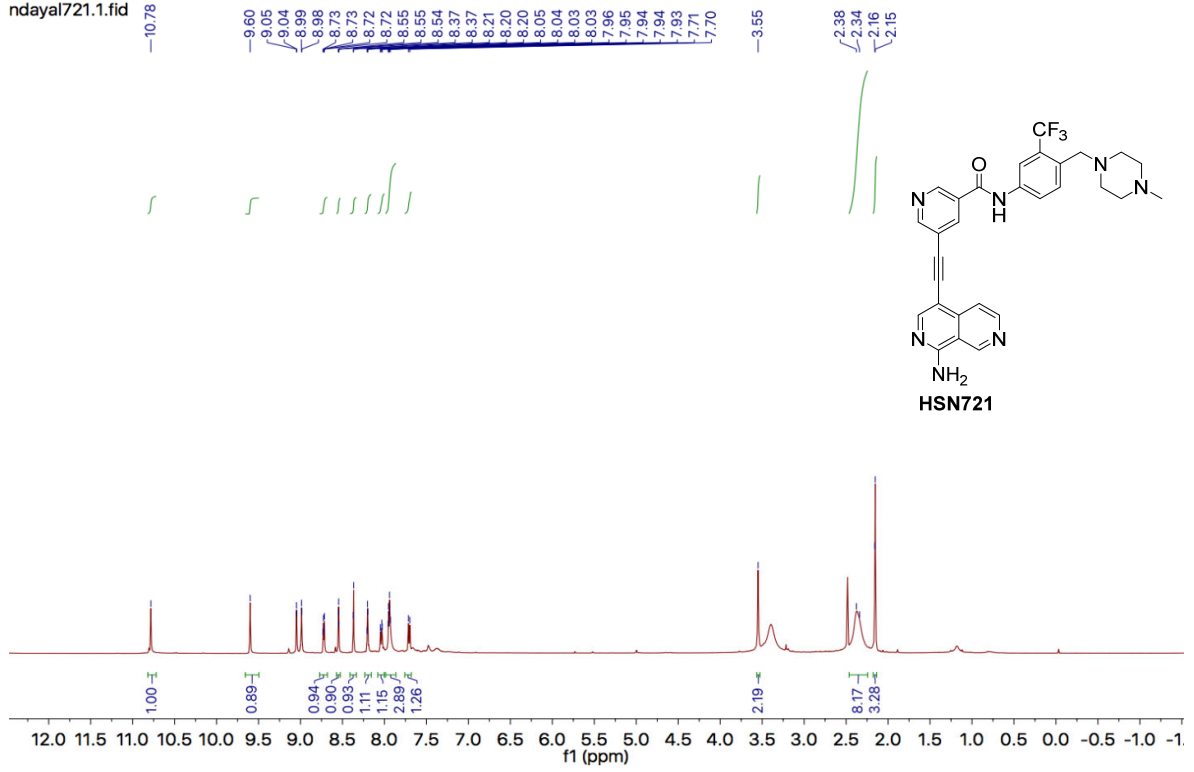

ndayal721.2.fid

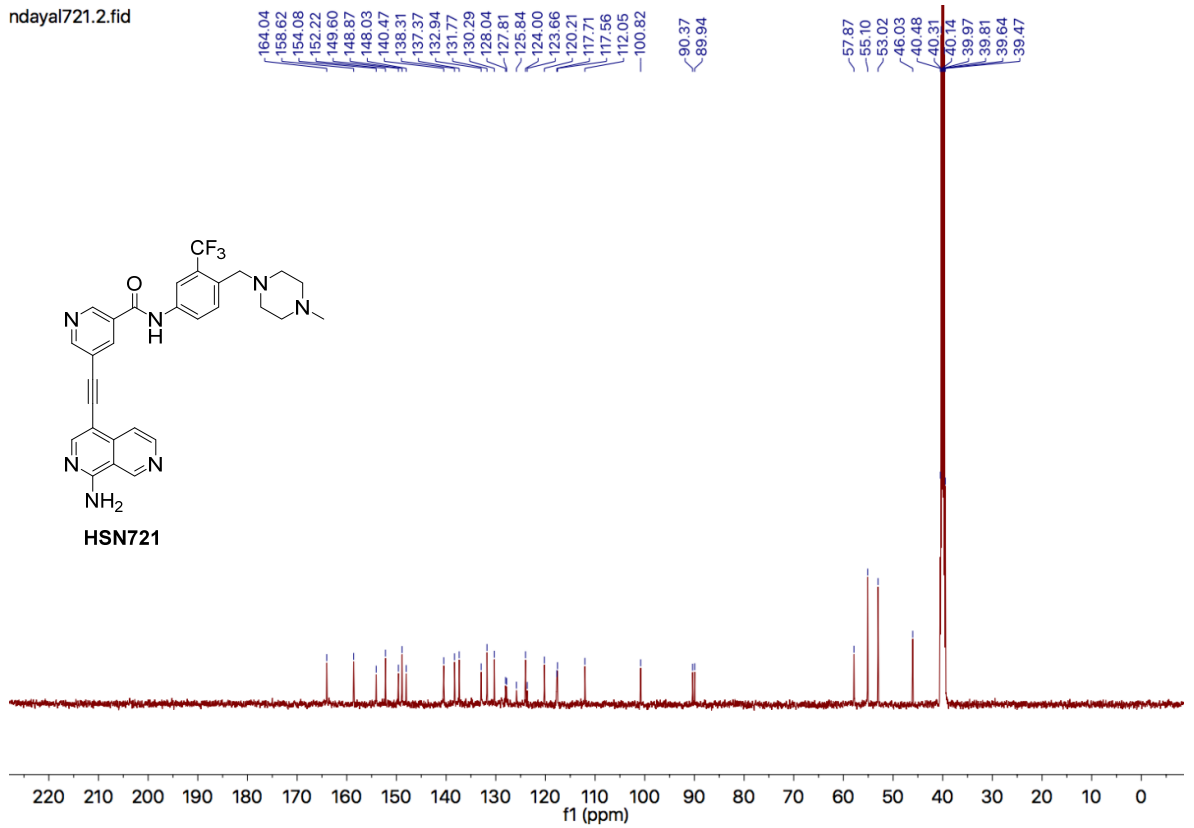

NN714-insoluble solid while extraction.1.fid  
H1 standard parameters, cryoprobe prodigy

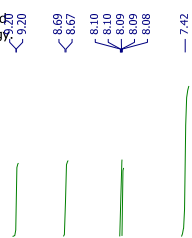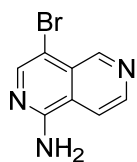

**HSN714**

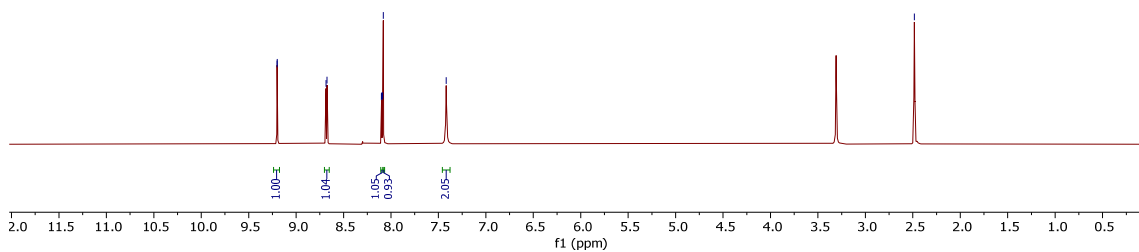

NN714-insoluble solid while extraction.2.fid  
C13 standard parameters, cryoprobe prodigy

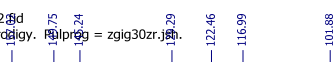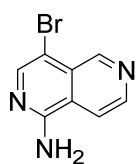

**HSN714**

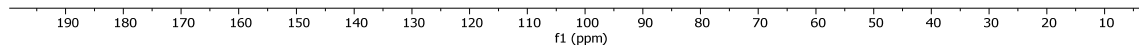

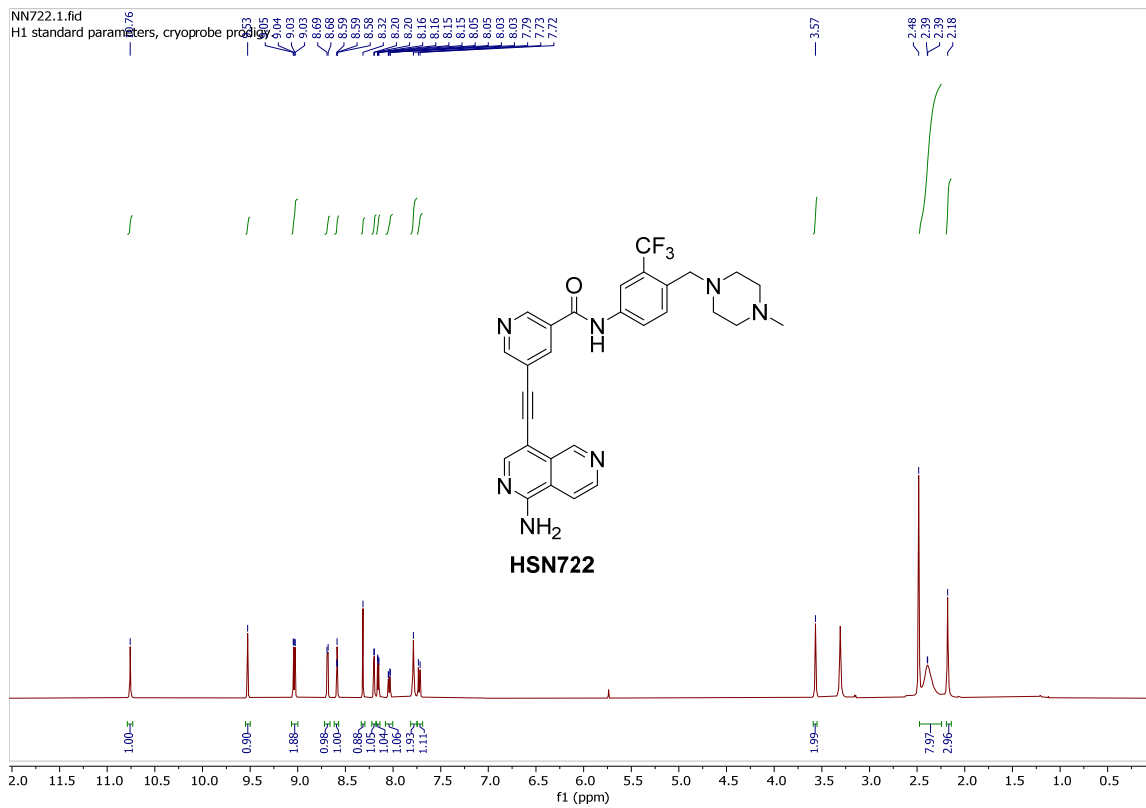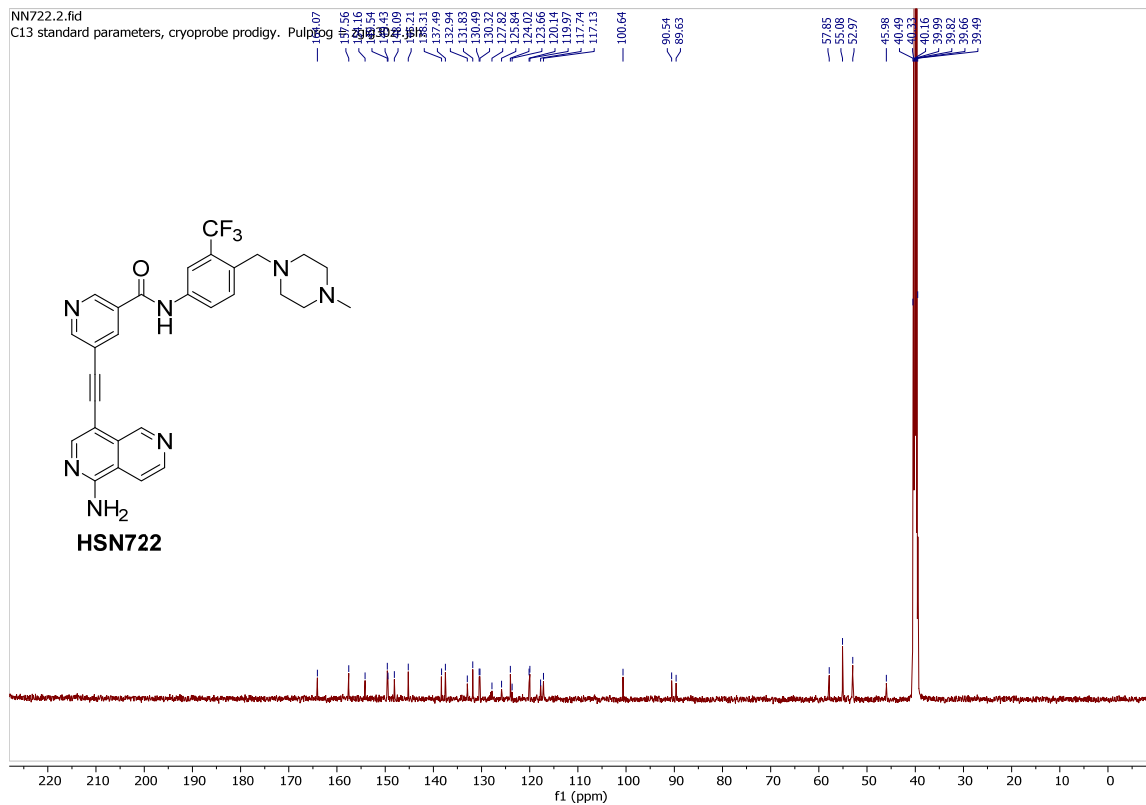

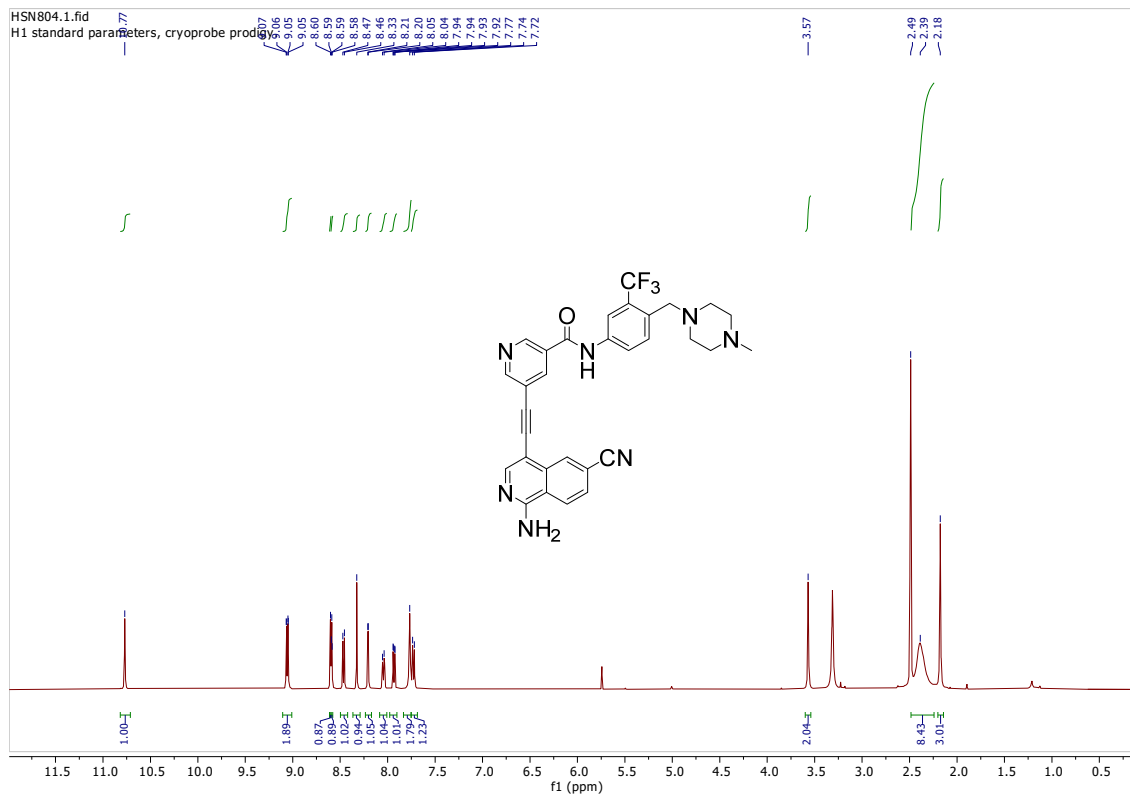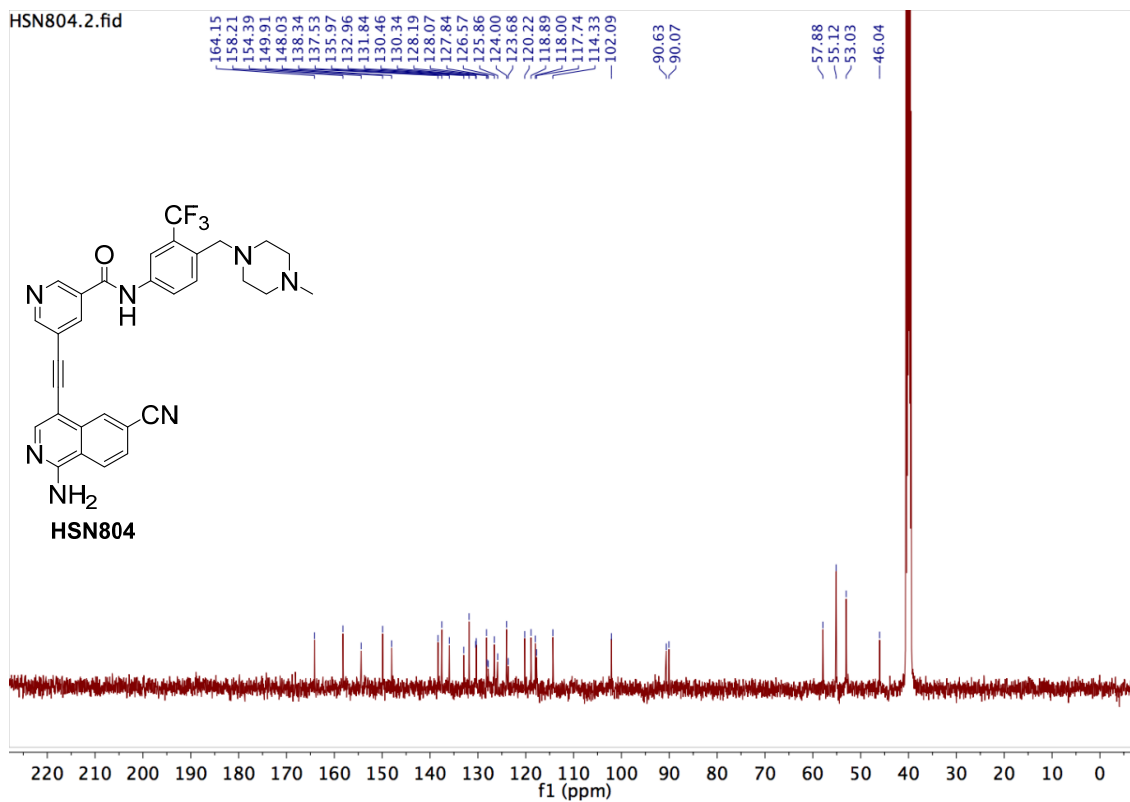

207.1.fid  
H1 standard parameters, cryoprobe prodigy.

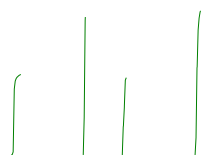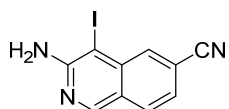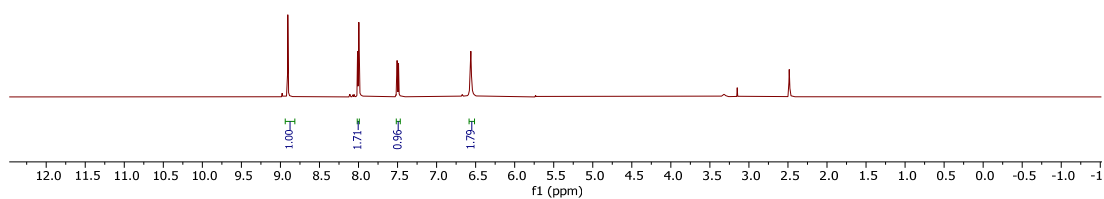

207carbon.1.fid  
C13 standard parameters, cryoprobe prodigy. Pulprog 30zr.jsh.

147.90  
146.23  
138.97  
133.96  
130.80  
124.36  
123.27  
119.00  
114.89  
71.64

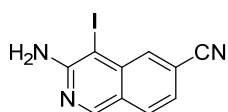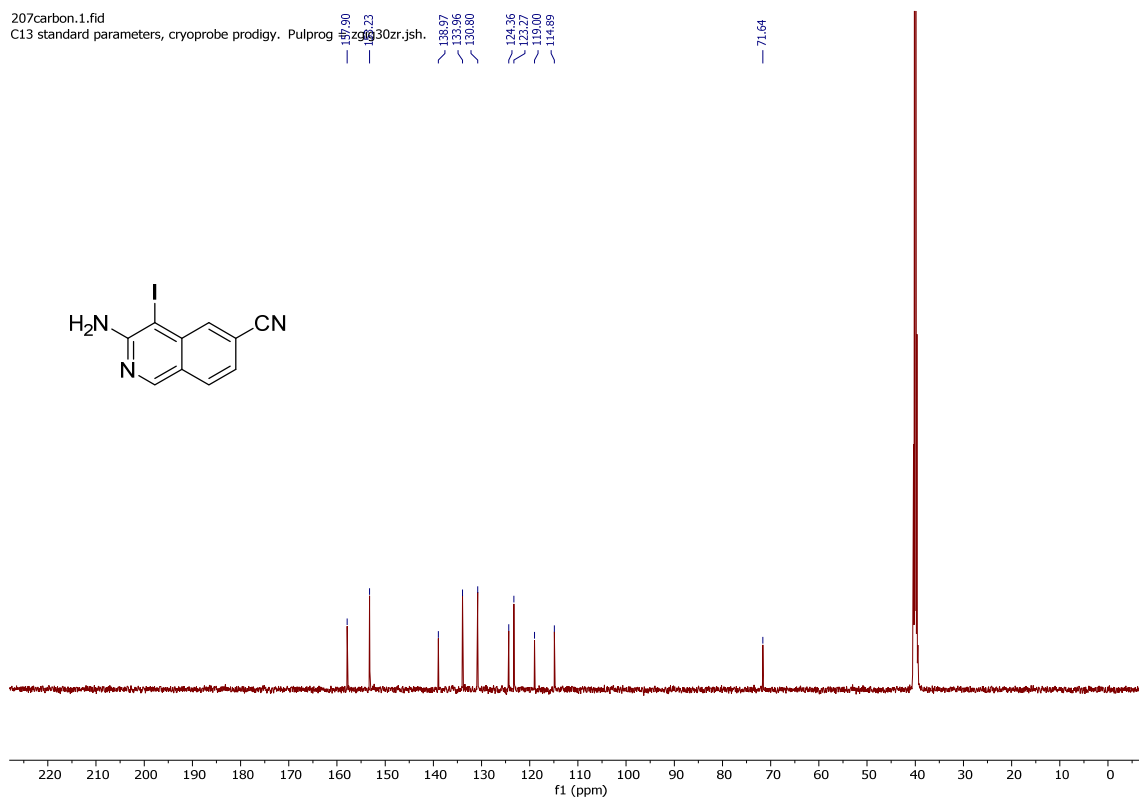



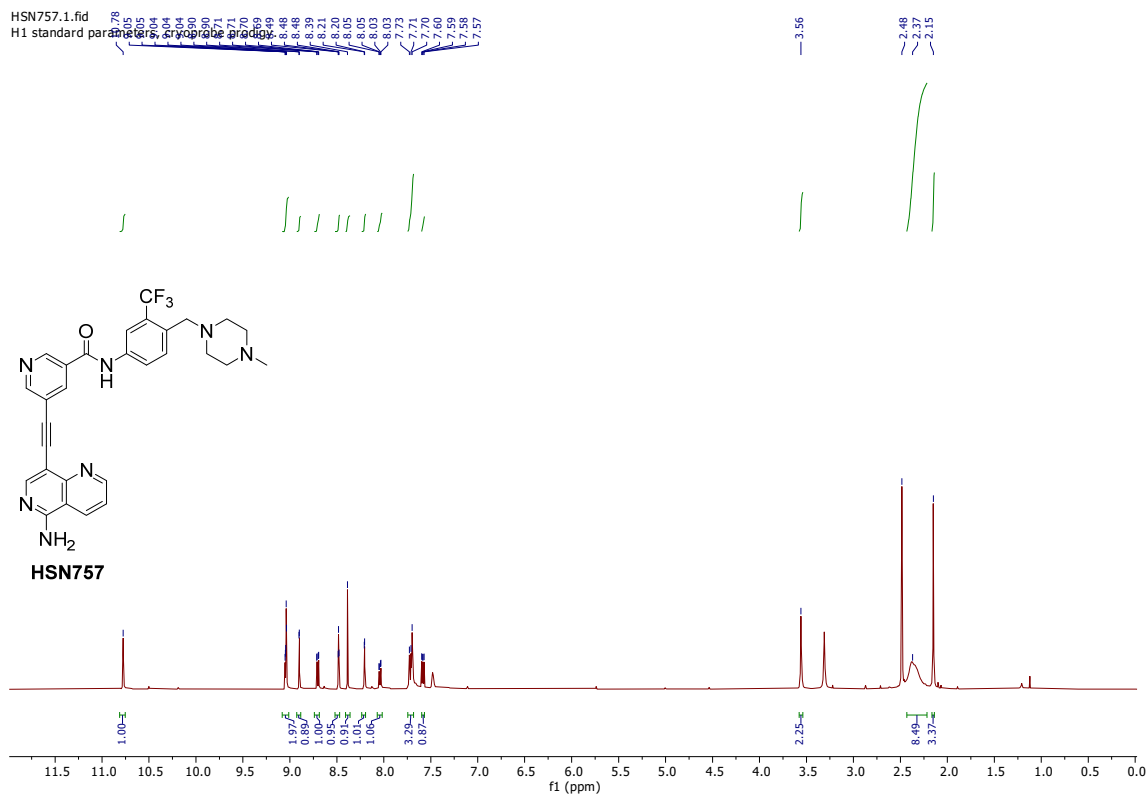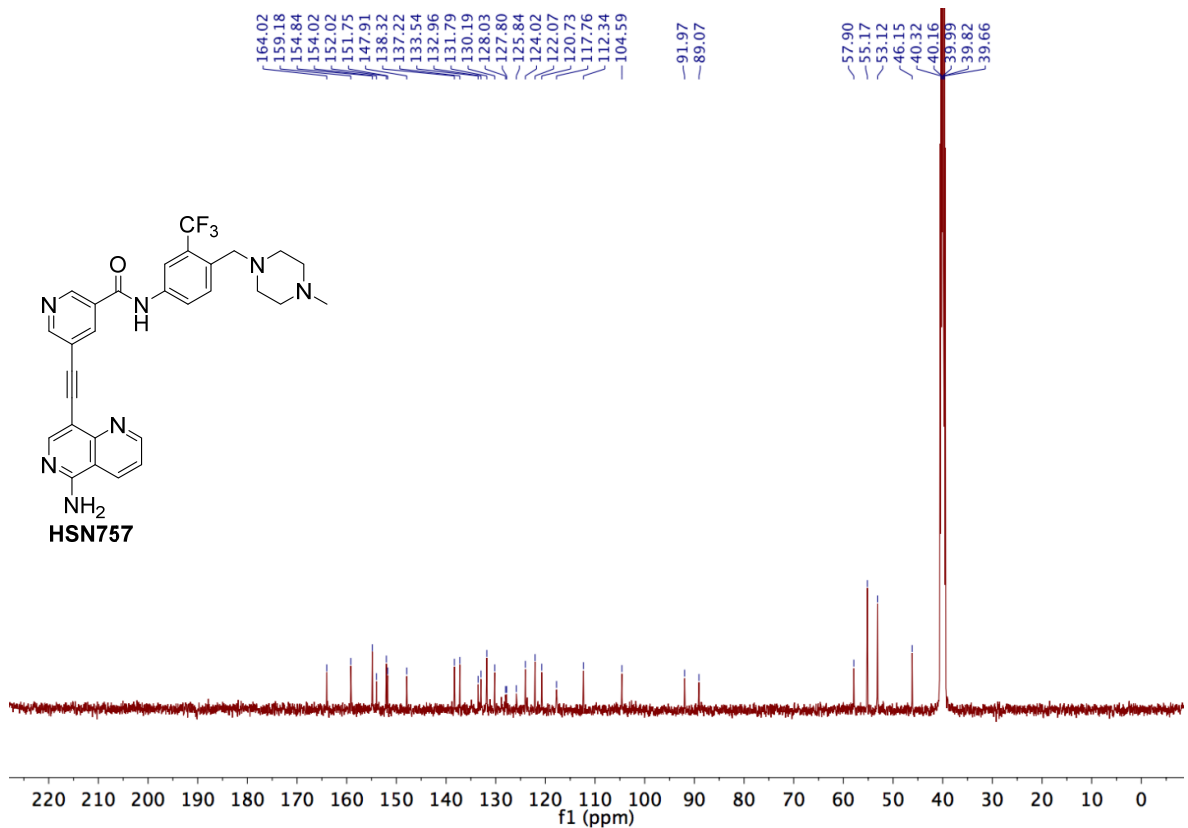

HSN796.1.fid  
H1 standard parameters, cryoprobe prodigy.

8.24  
8.20  
7.92  
7.81  
7.77  
7.75  
7.75  
7.08  
6.97  
6.96

2.48

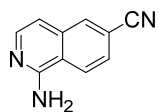

HSN796

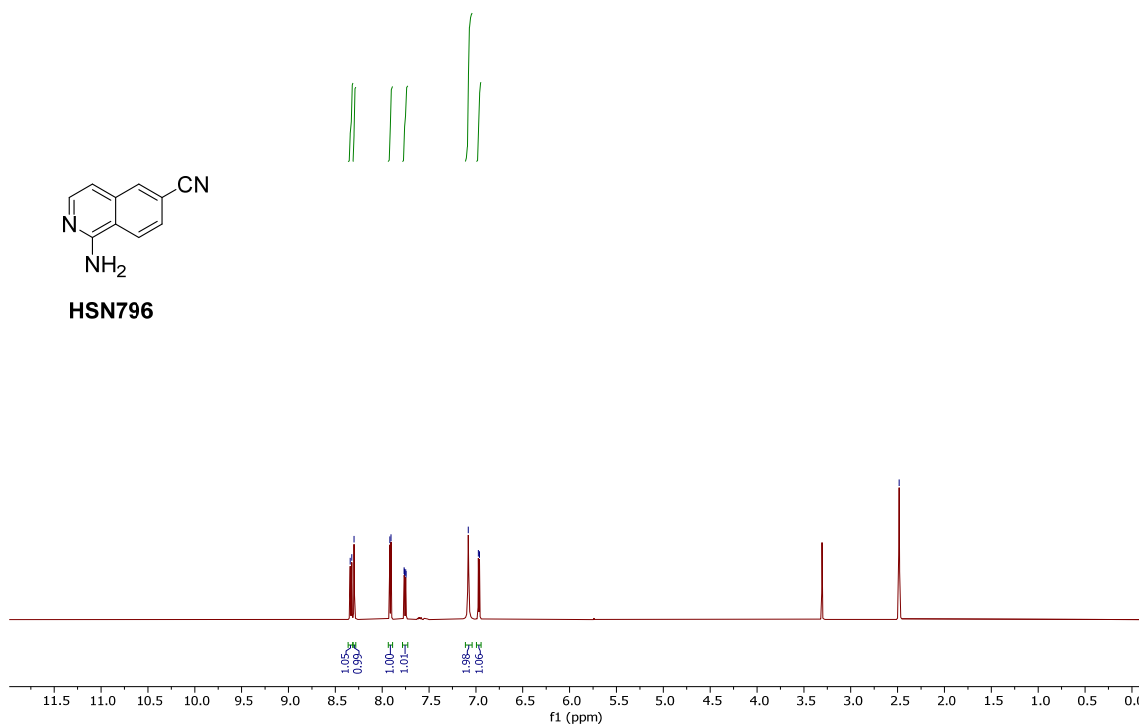

HSN796.2.fid  
C13 standard parameters, cryoprobe prodigy.

177.76  
147.27  
138.77  
138.84  
134.62  
126.02  
119.10  
118.60  
112.81  
109.62

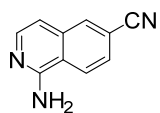

HSN796

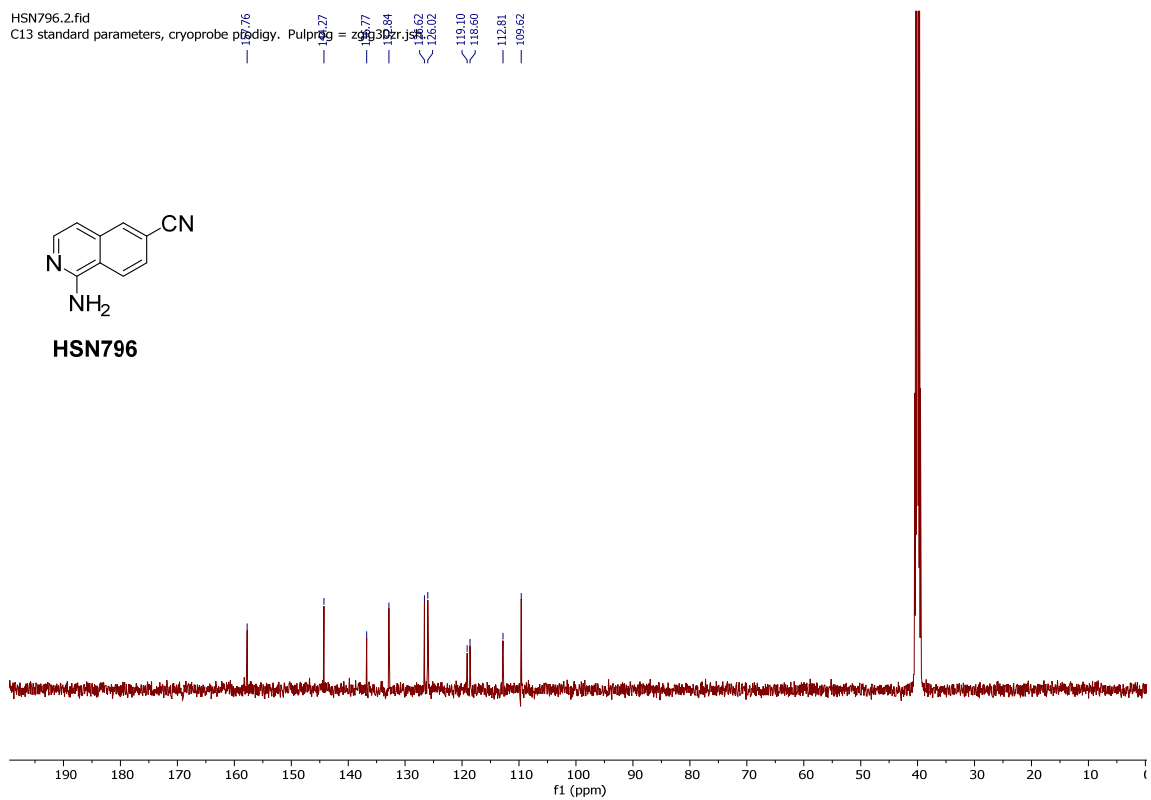



ndayal-804brs.1.fid

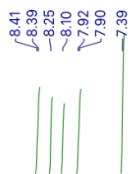

3.31 H<sub>2</sub>O  
2.49 DMSO

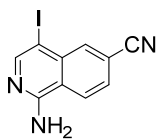

HSN797

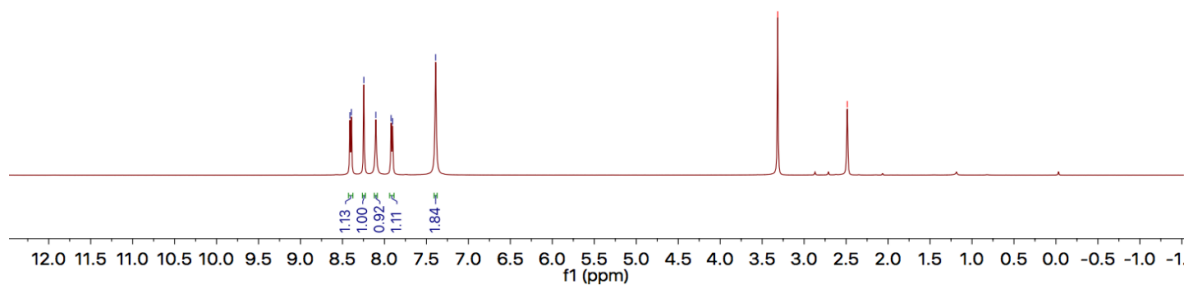

ndayal-804brs.2.fid

157.61  
145.57  
134.76  
130.97  
128.12  
126.84  
120.37  
118.64  
114.50  
103.53

40.34  
40.17  
39.84  
39.67

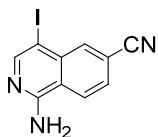

HSN797

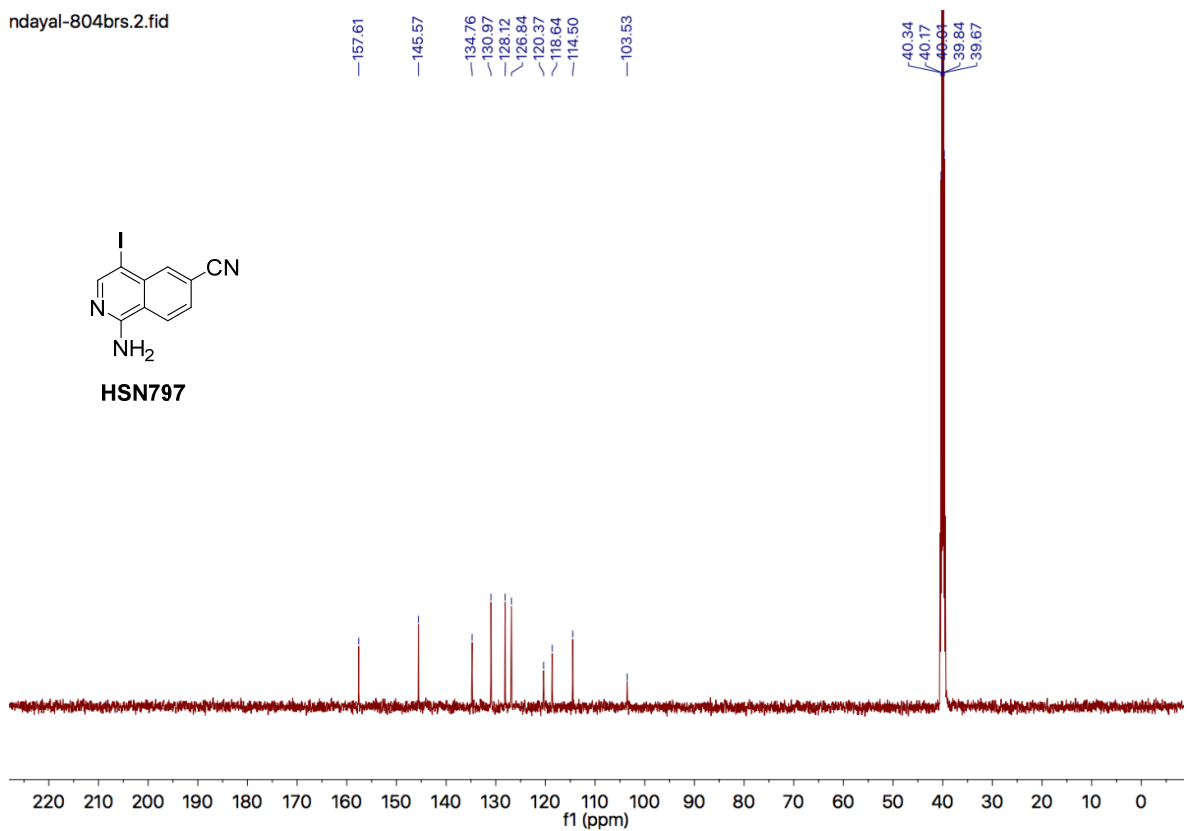

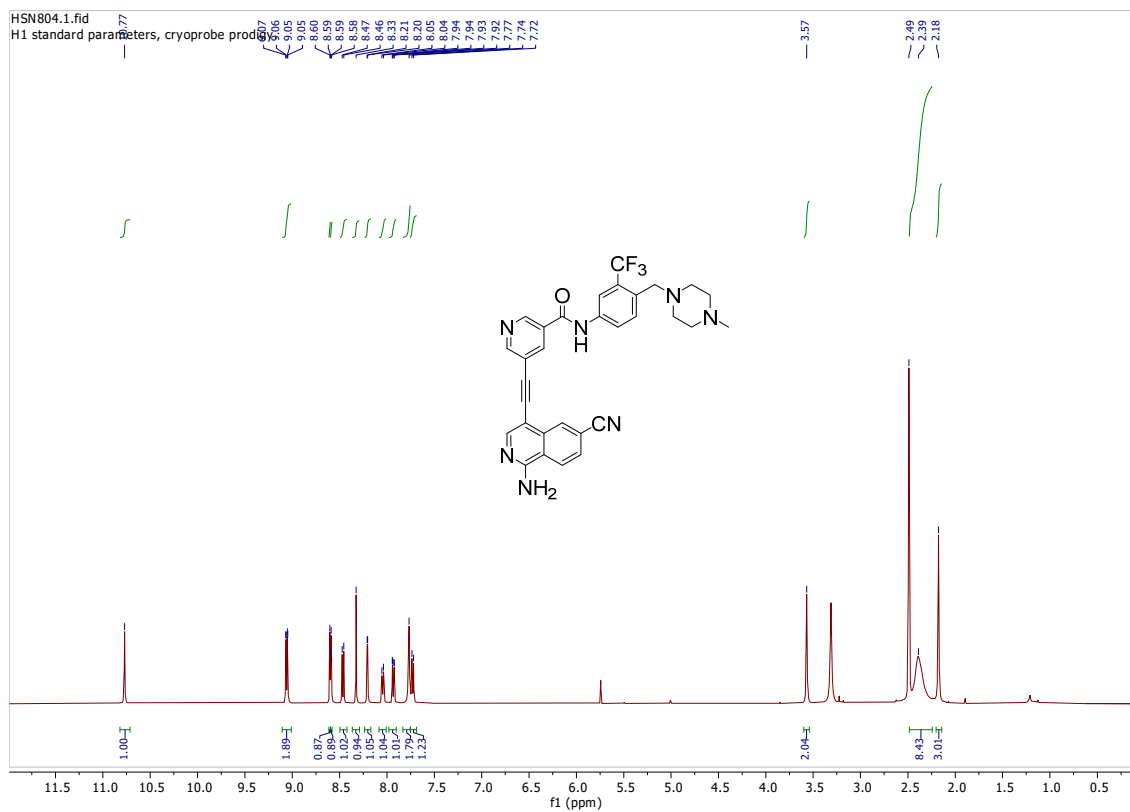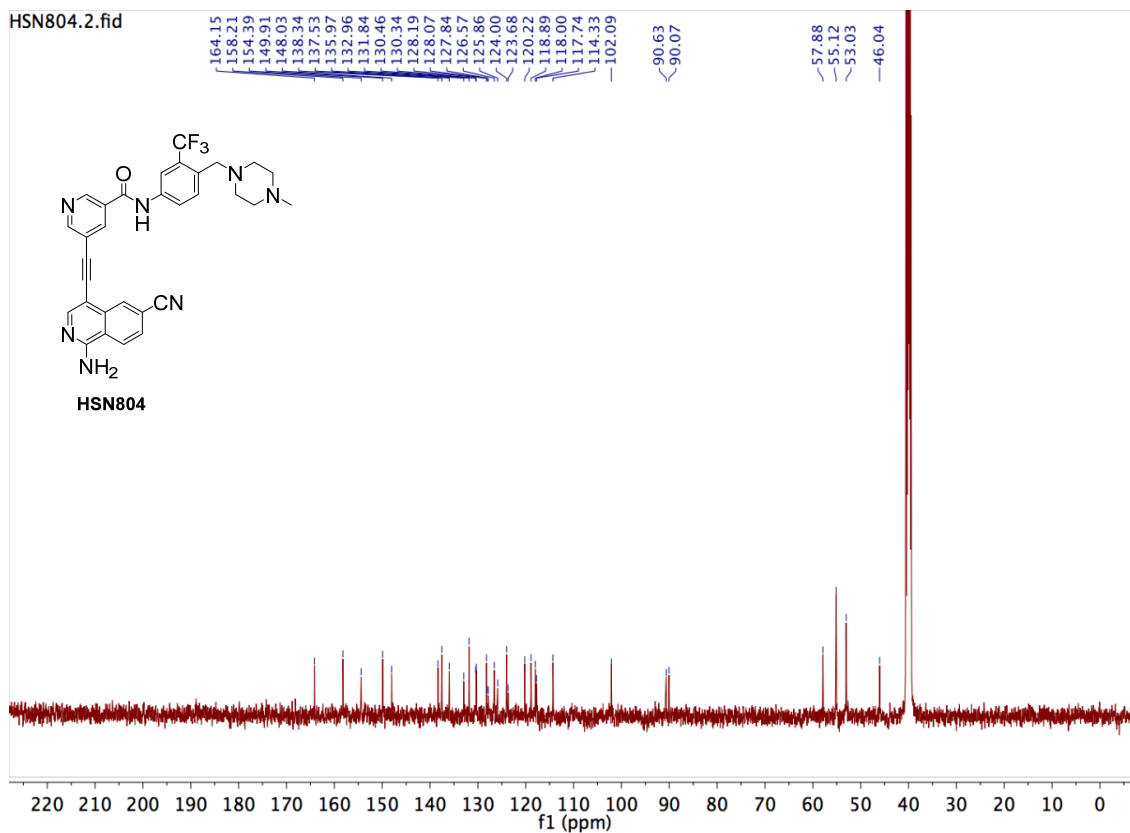

HN631.1.fid  
 H1 standard parameters, cryoprobe prodigy

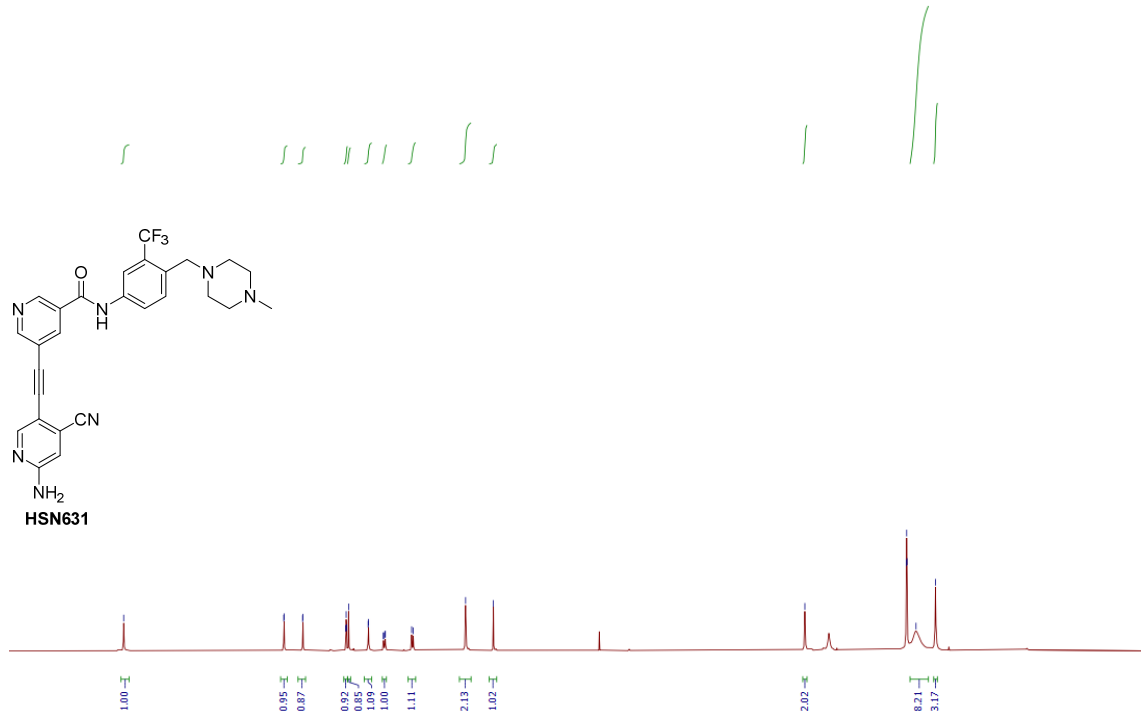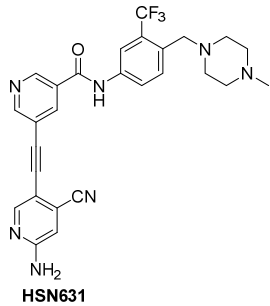

HN631.2.fid  
 C13 standard parameters, cryoprobe prodigy

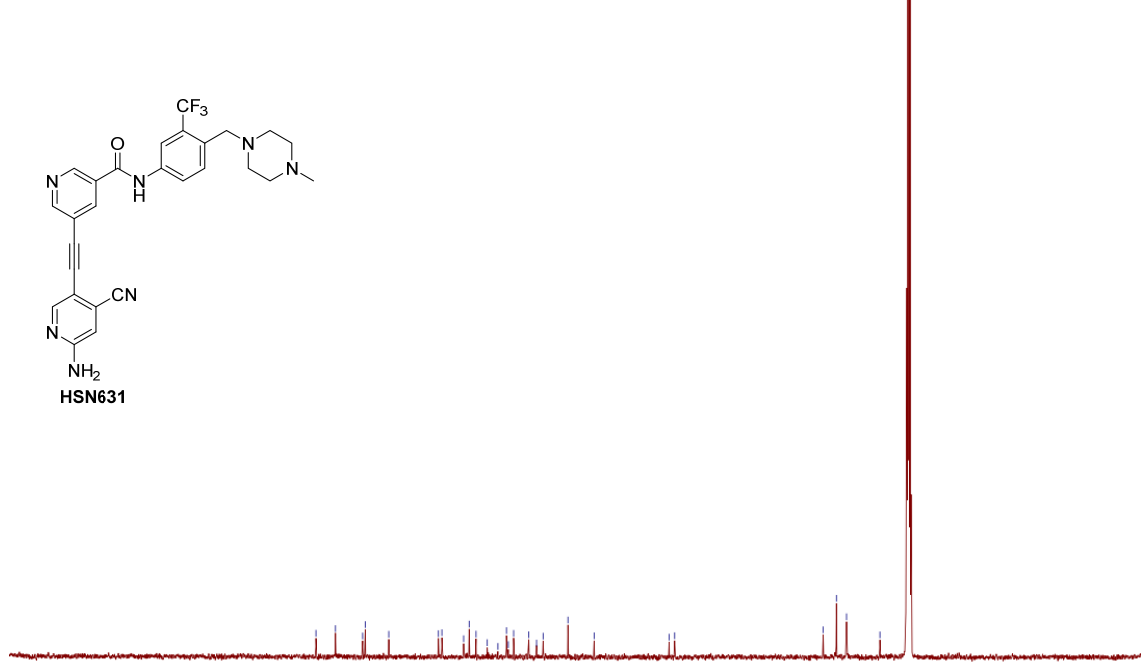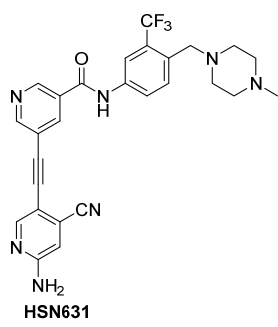

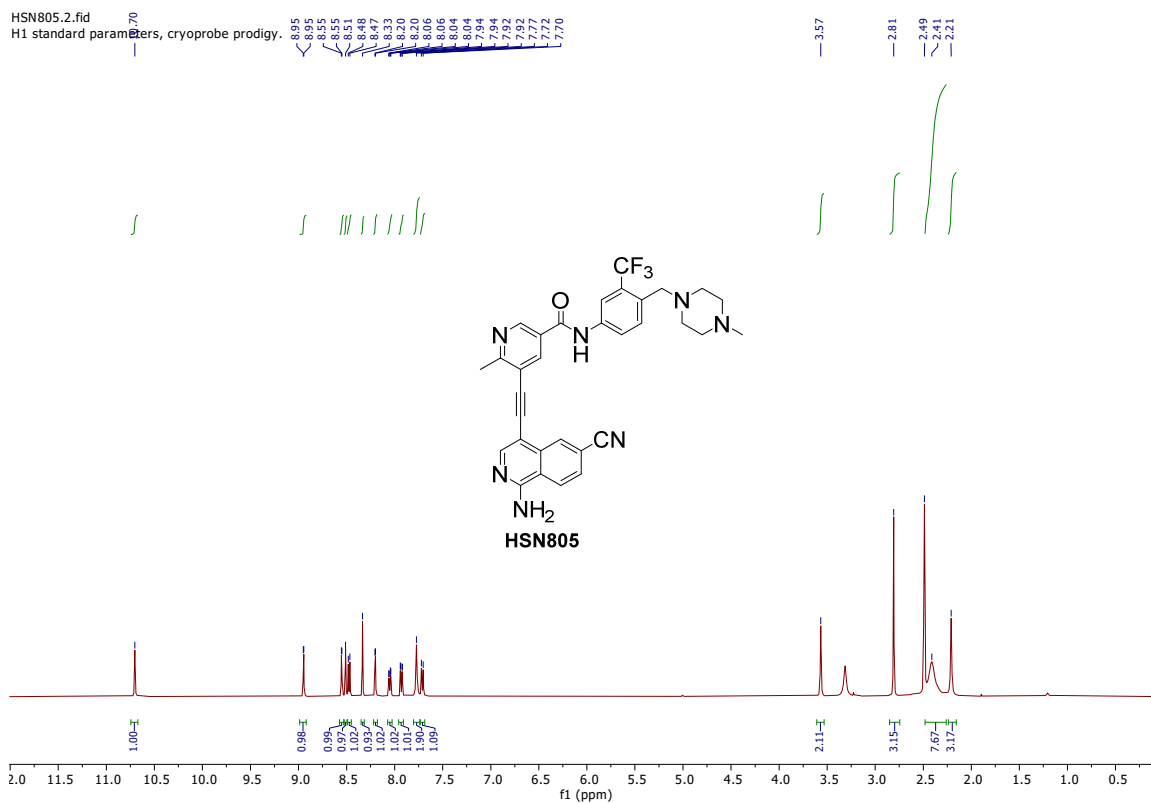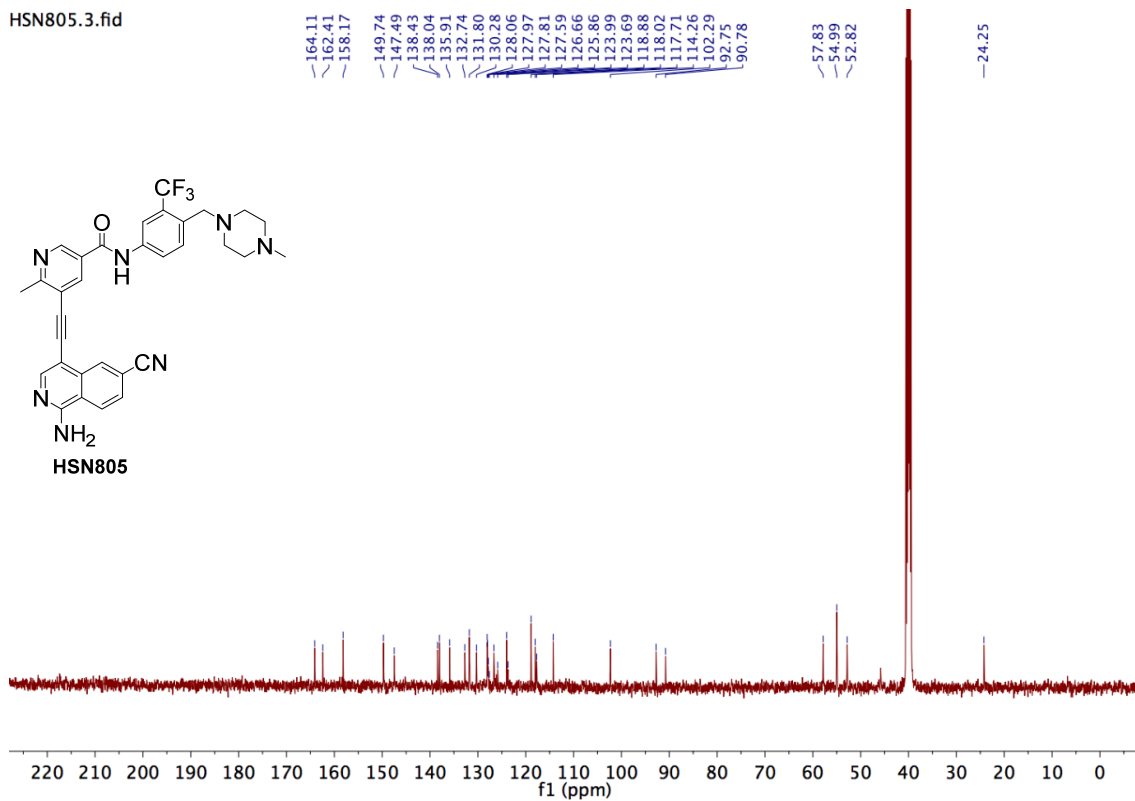

HSN806.1.fid  
 H1 standard parameters, cryoprobe prodigy

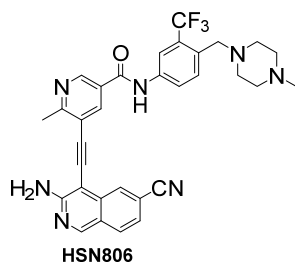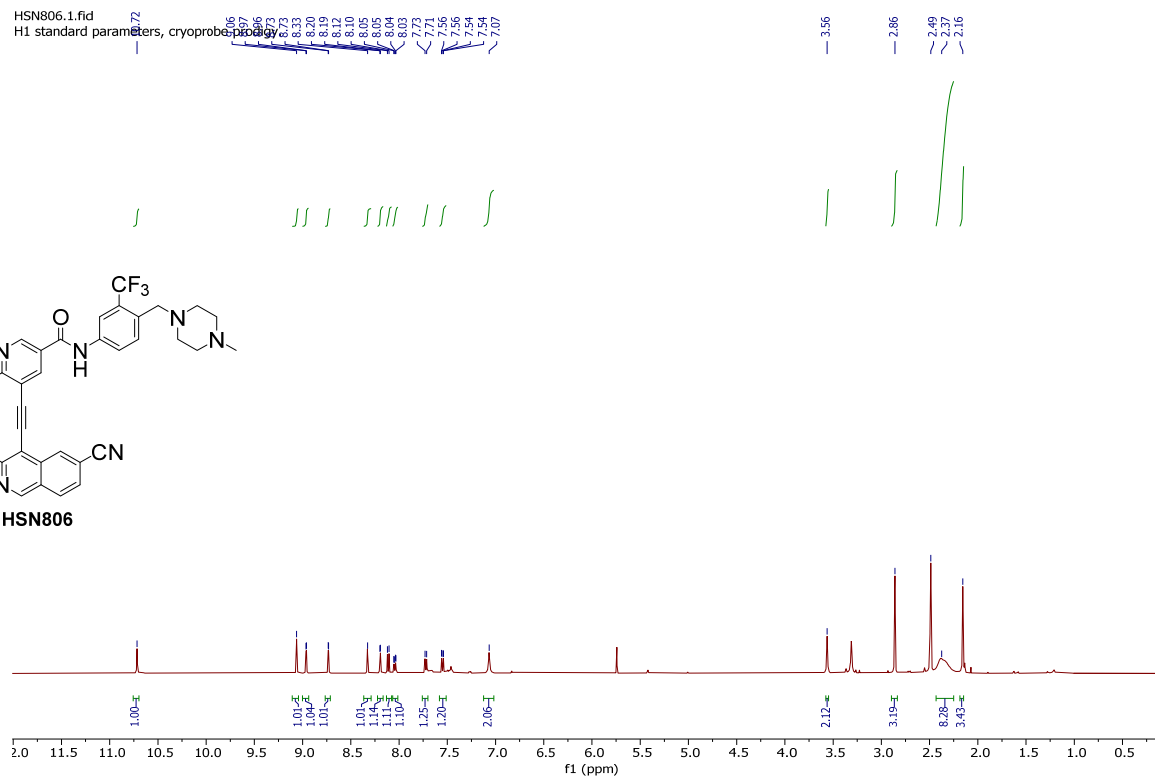

HSN806.2.fid  
 C13 standard parameters, cryoprobe prodigy

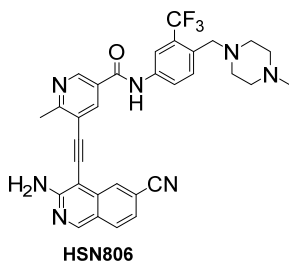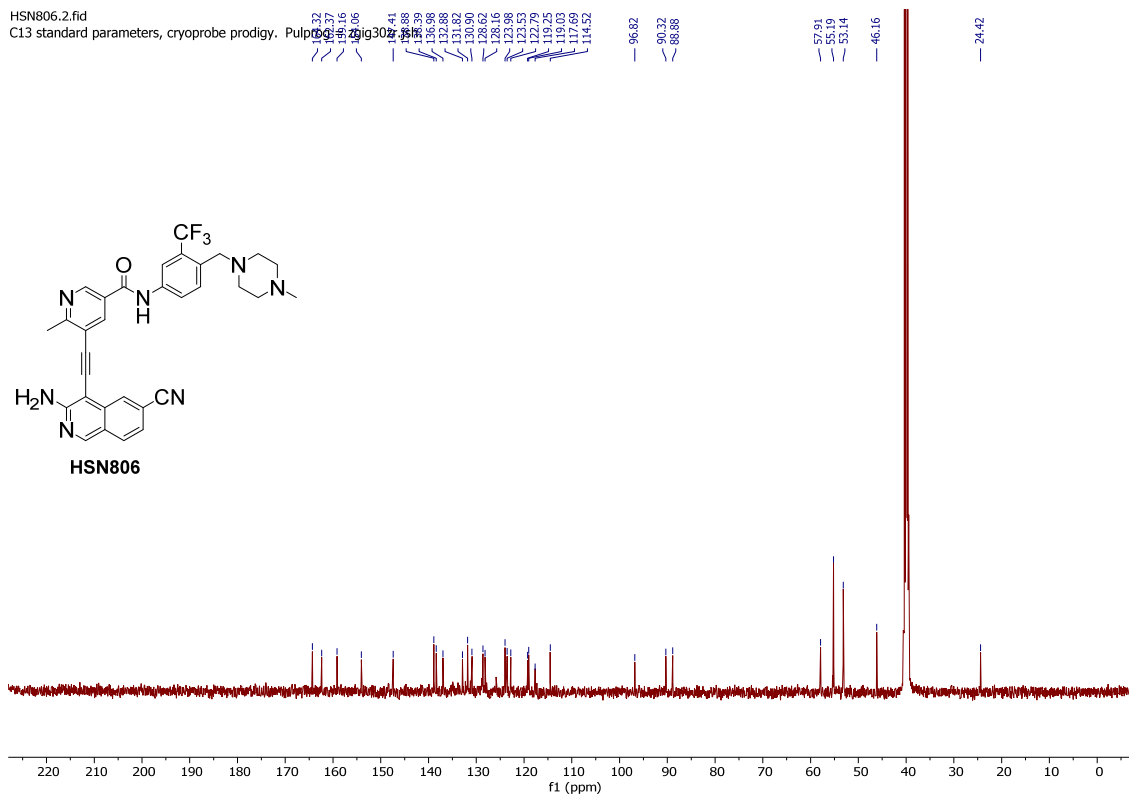

HSN815.1.fid  
 H1 standard parameters, cryoprobe

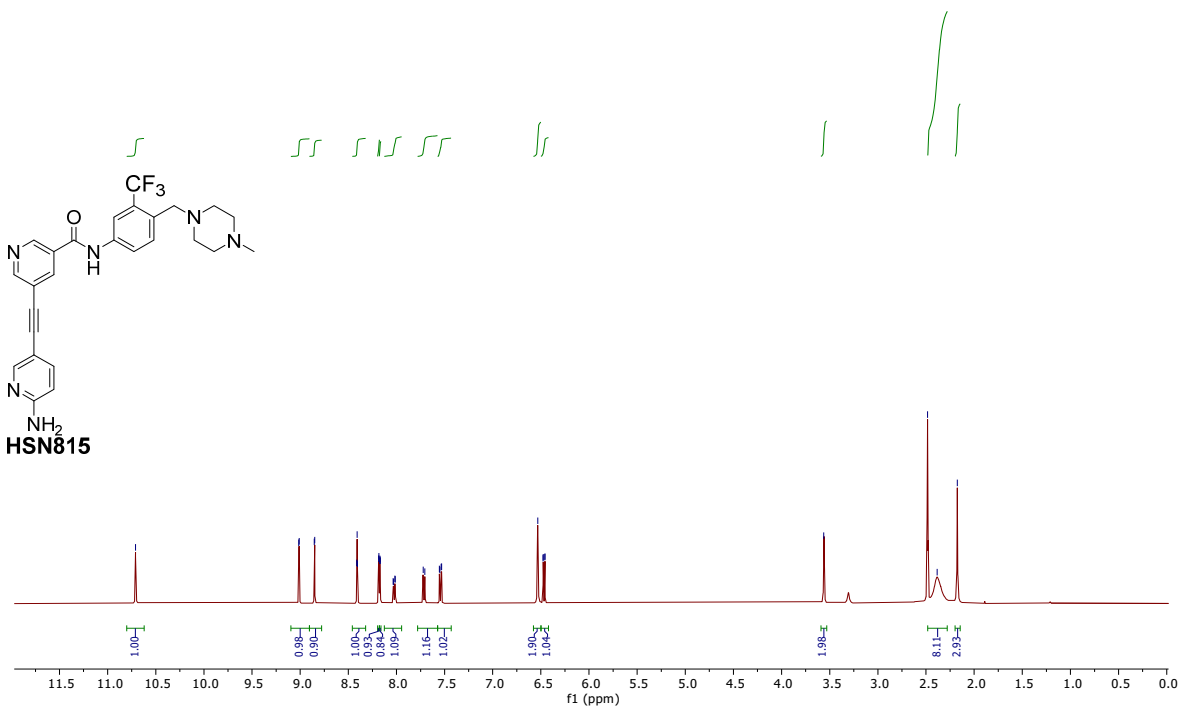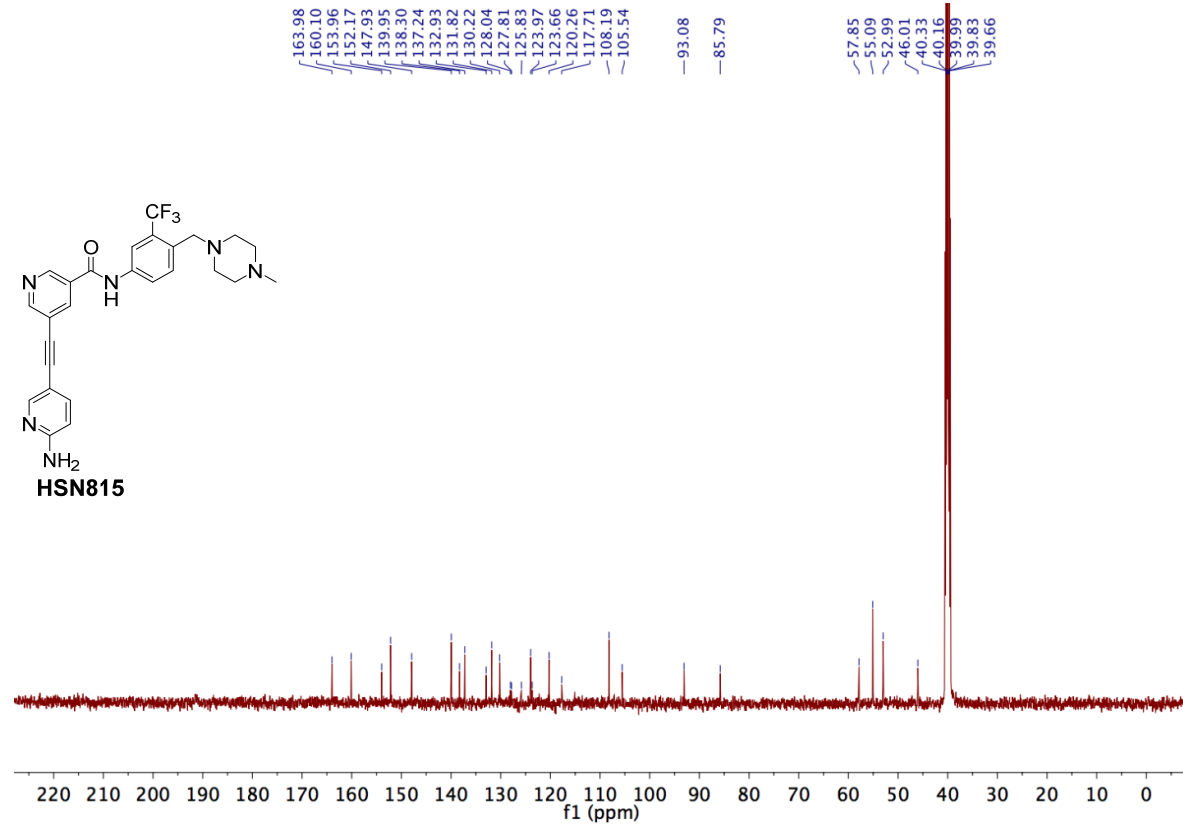

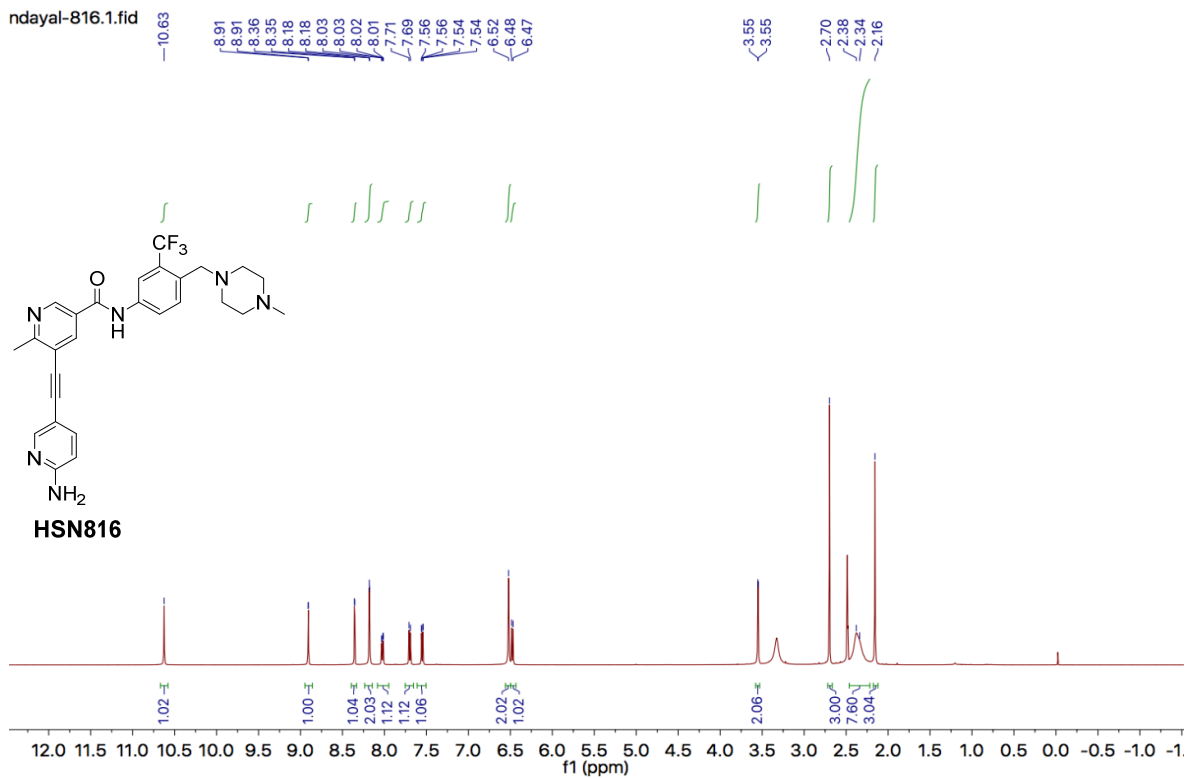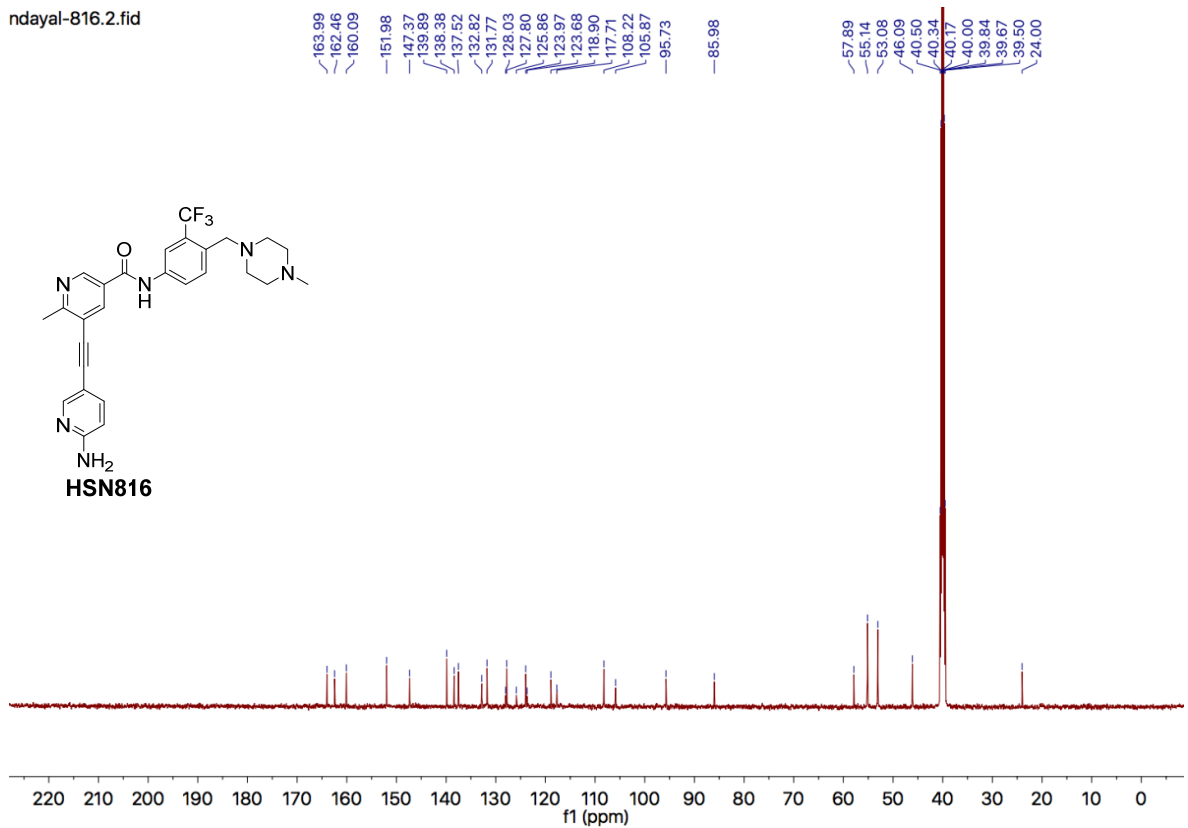

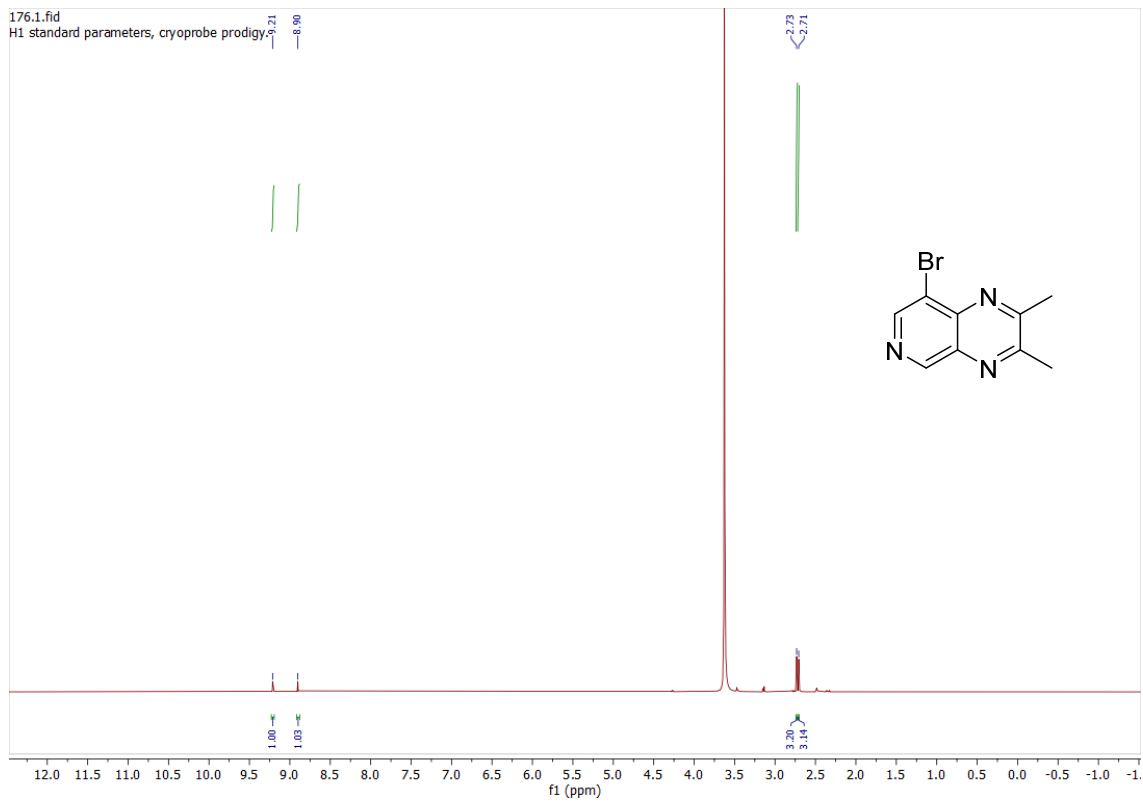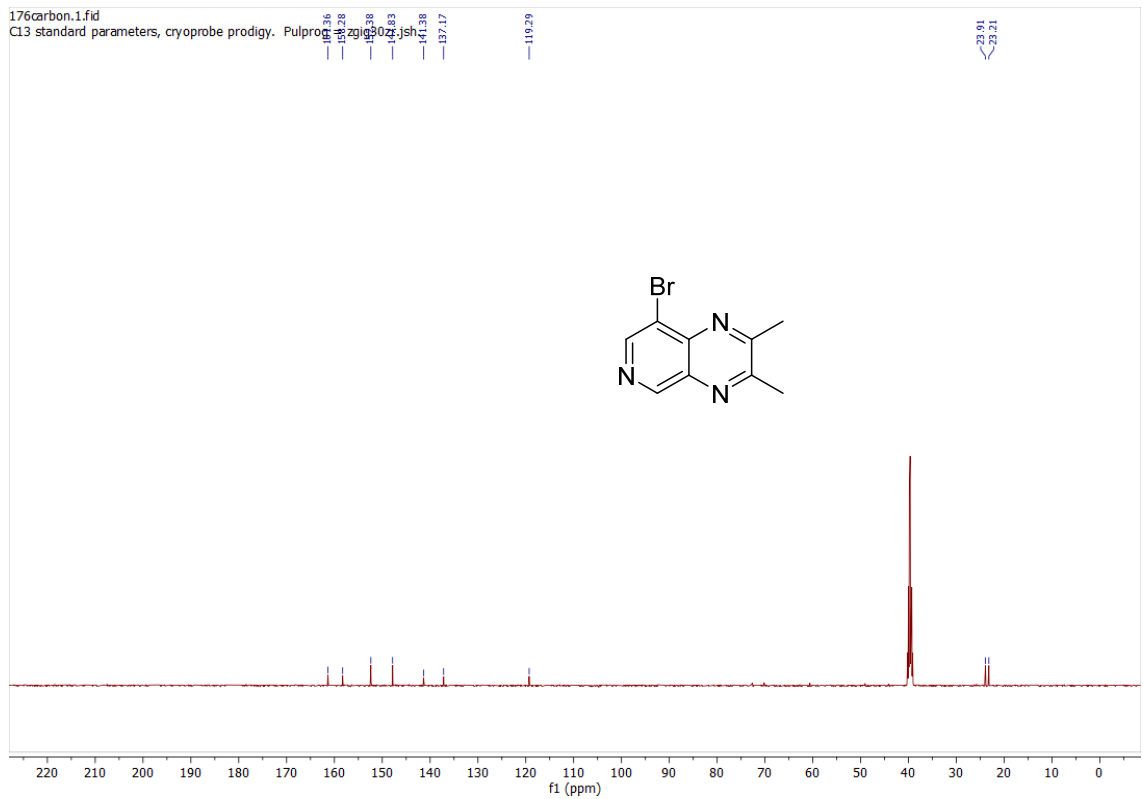



ndayal211.1.fid

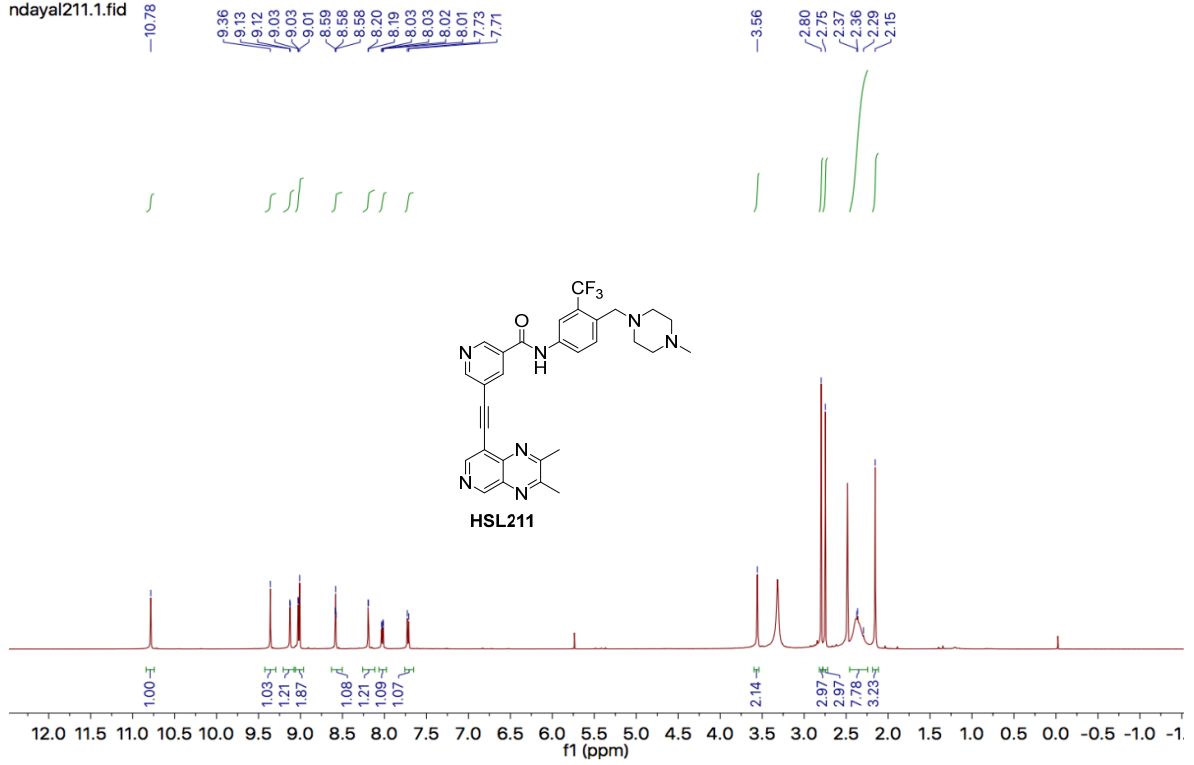

ndayal211.2.fid

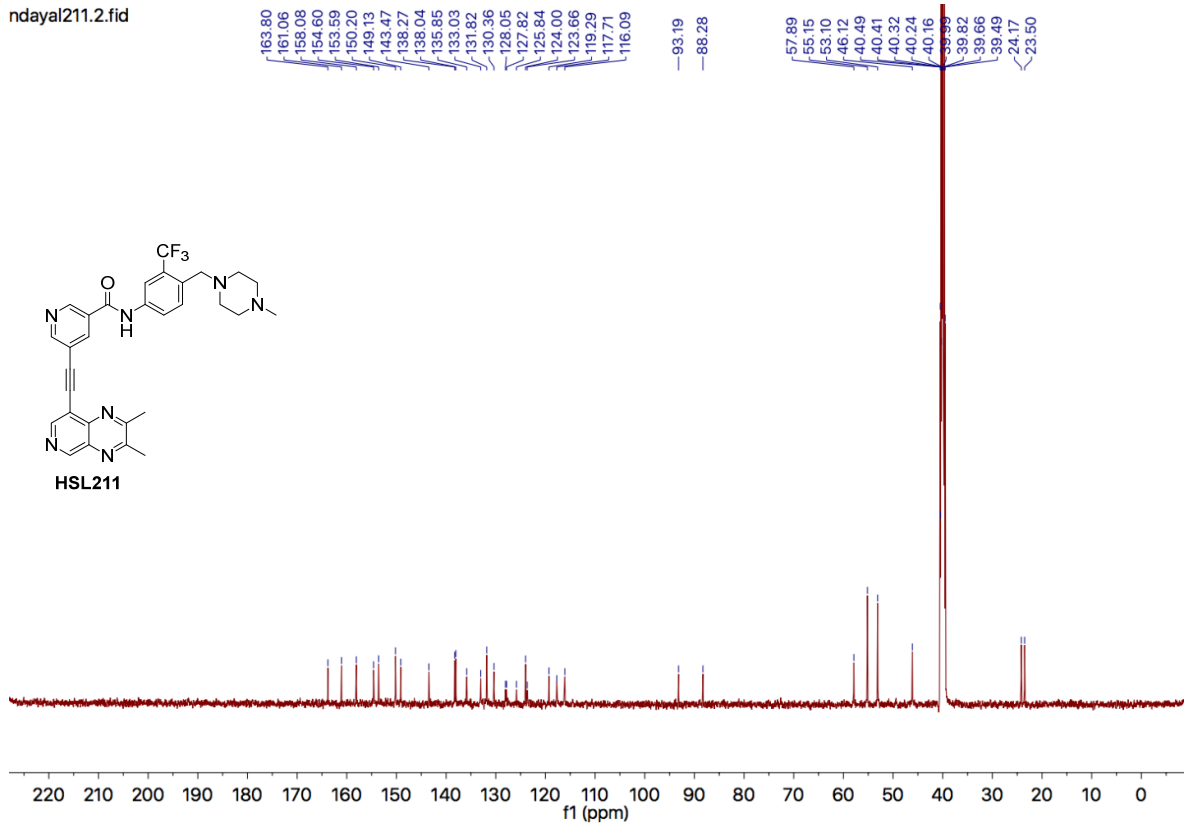

468proton.1.fid

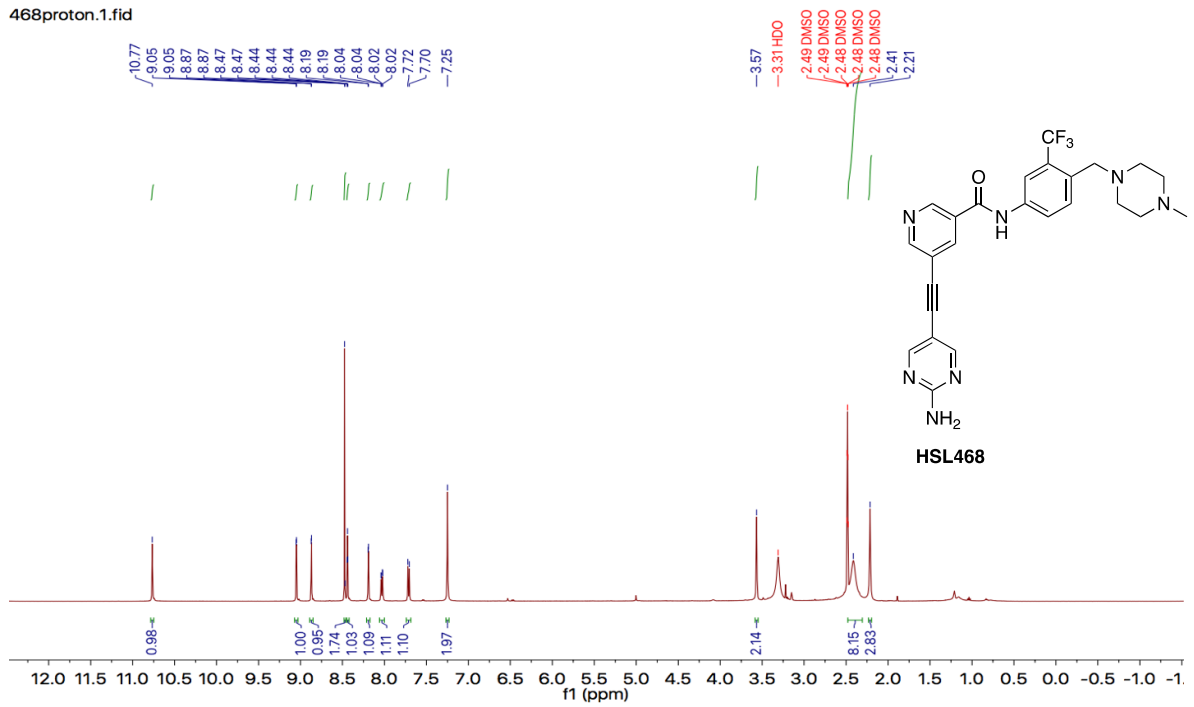

468 carbon.1.fid

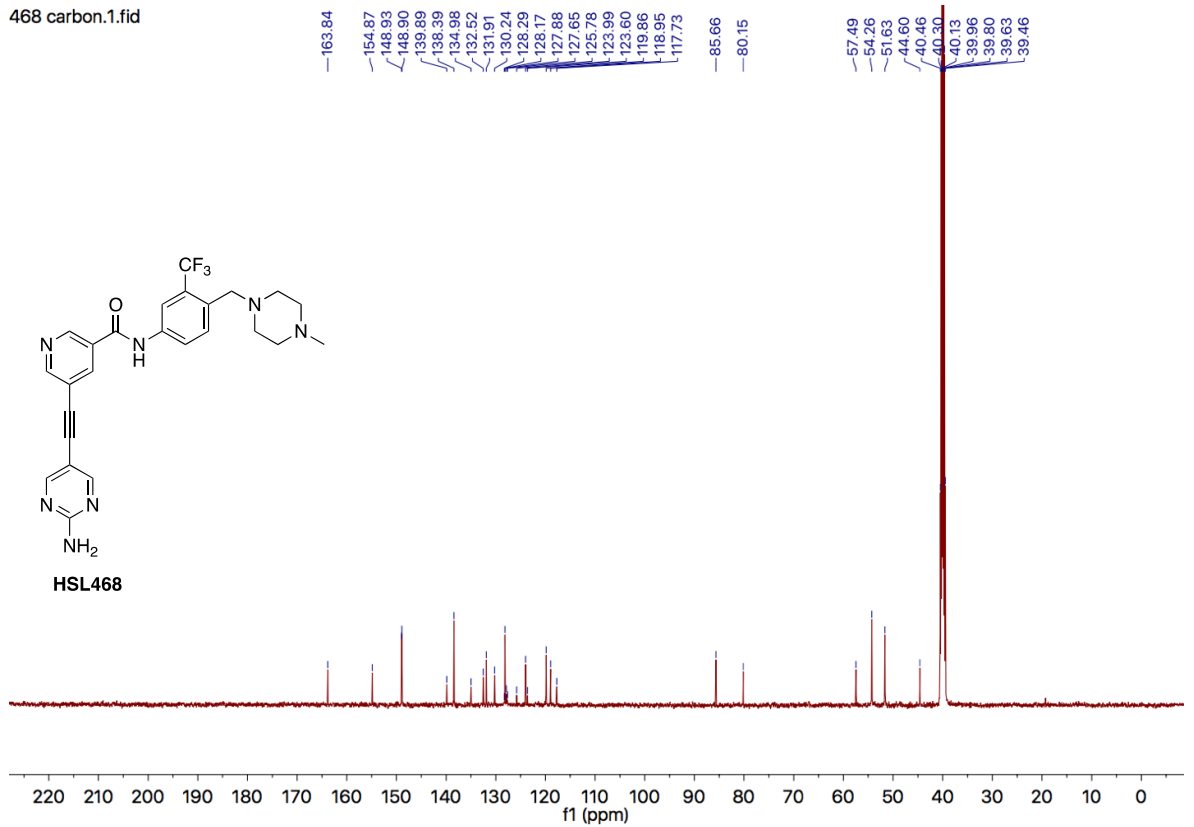

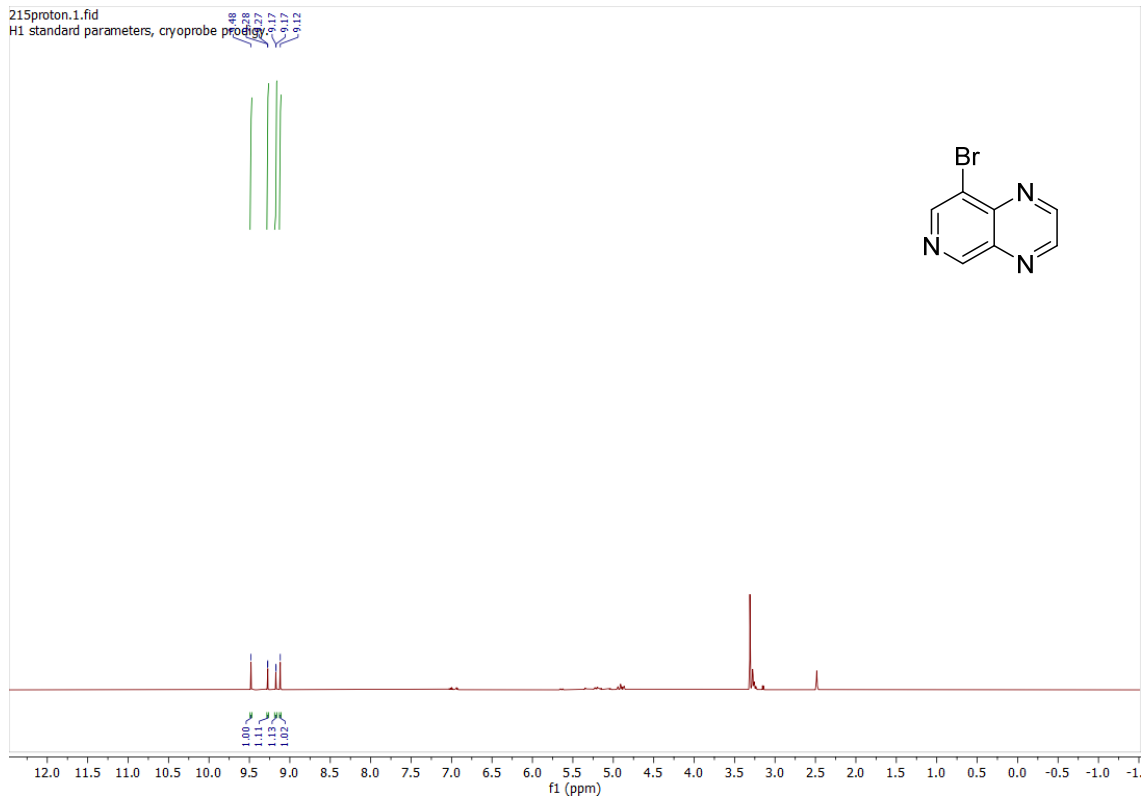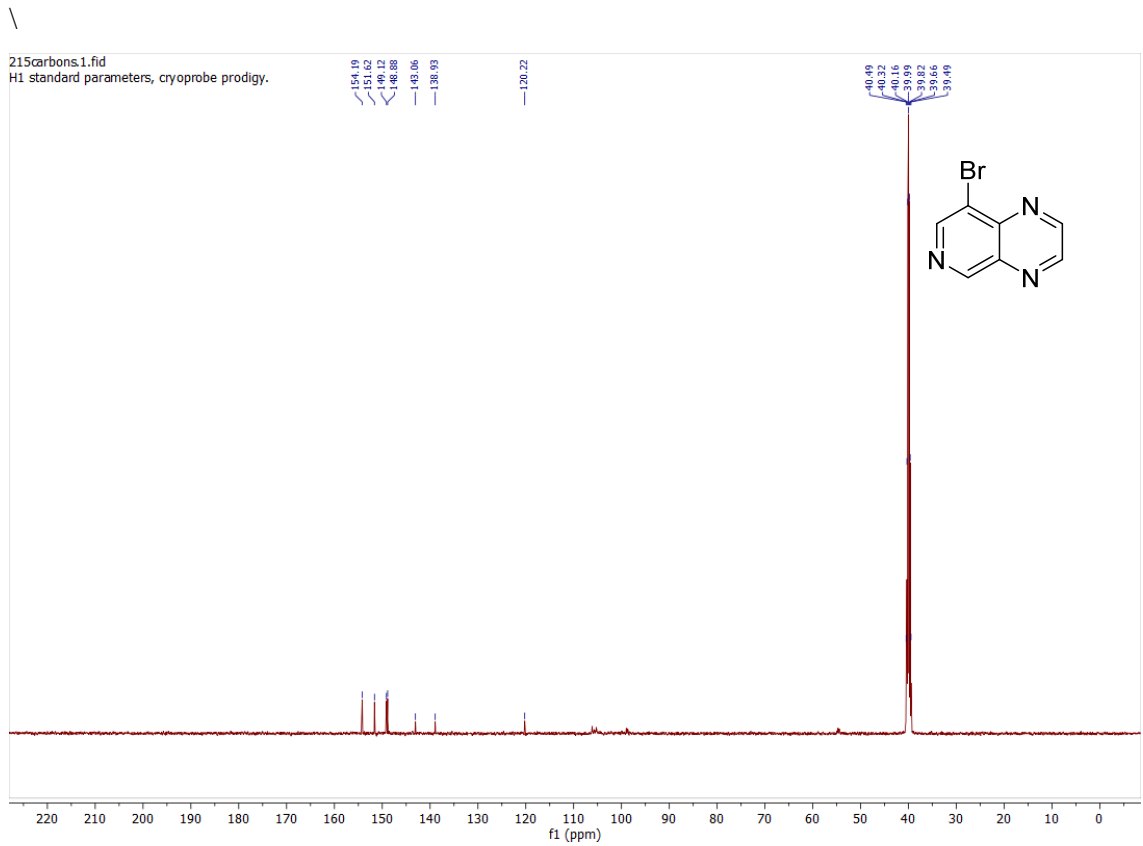

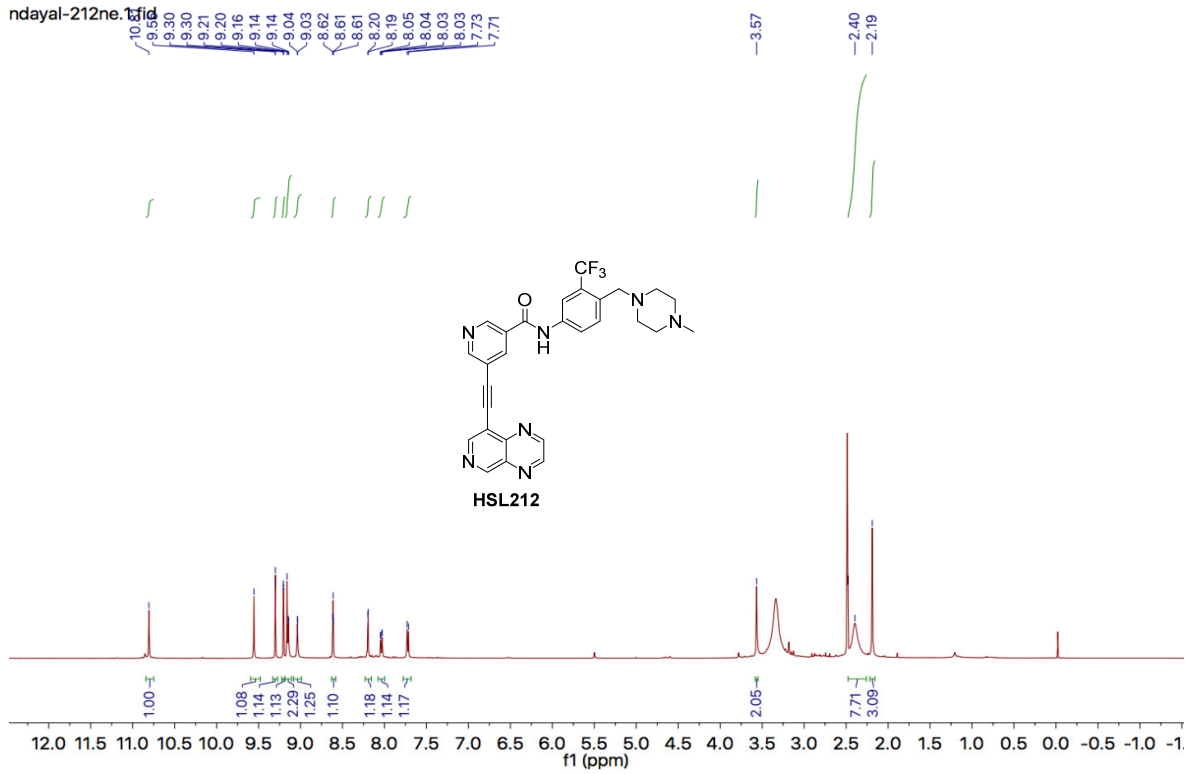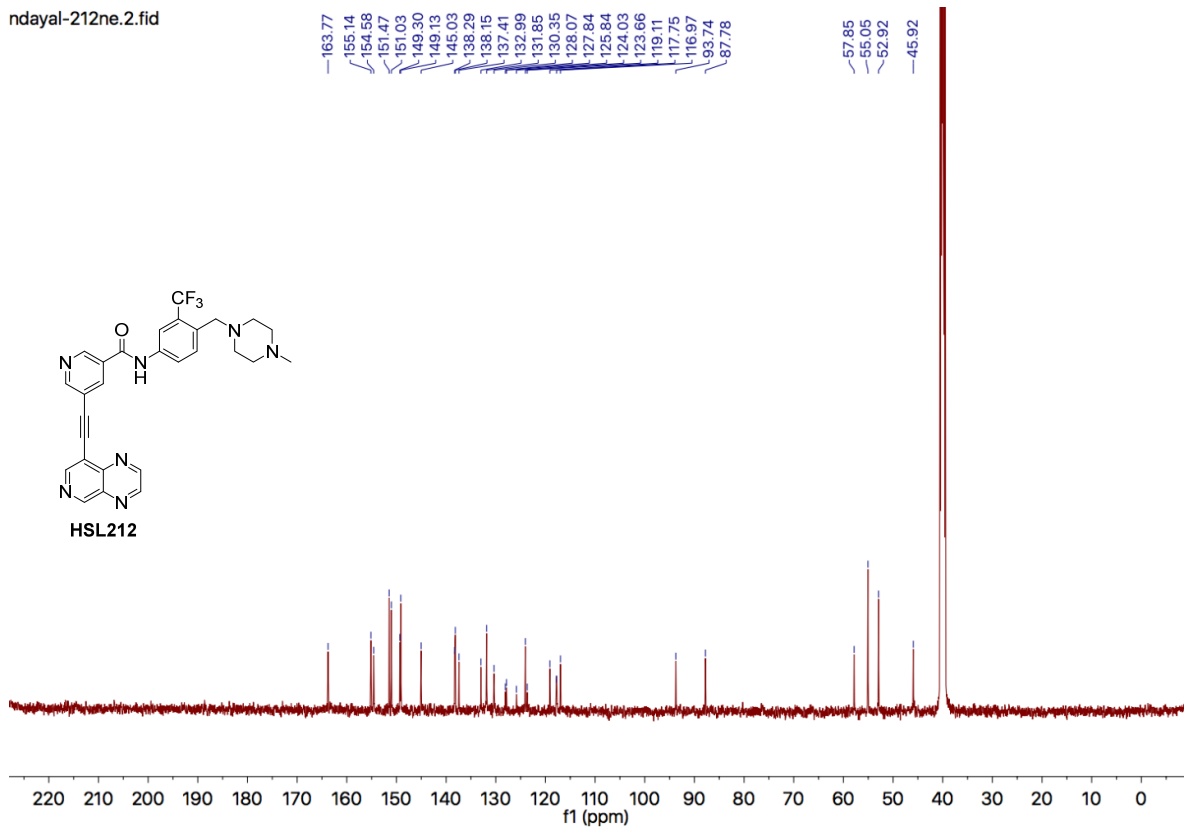

NN342A.1.fid  
H1 standard parameters, cryoprobe prodigy.

8.78  
7.83  
7.81  
7.62  
7.62  
7.61  
7.61  
7.28  
7.27  
7.26  
7.25  
7.25  
6.18

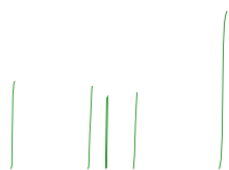

-2.48

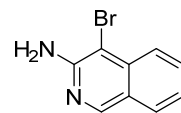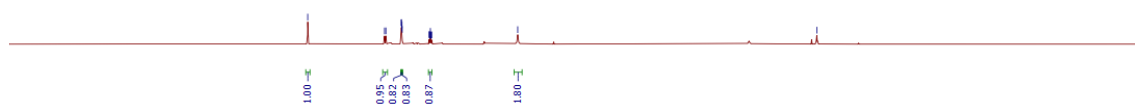

\

NN342A.2.fid  
Cl3 standard parameters, cryoprobe prodigy. Pulprog = 0.02r.jsh.

15.00  
139.68  
132.64  
131.93  
131.83  
131.16

-77.88

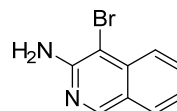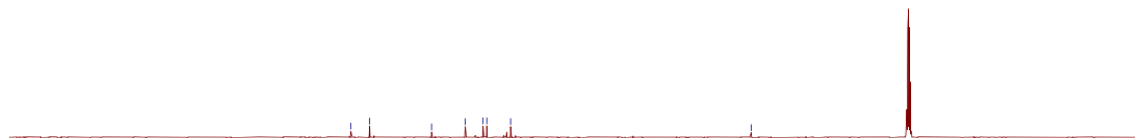

HSN700.1.fid  
H1 standard parameters, cryoprobe prodigy

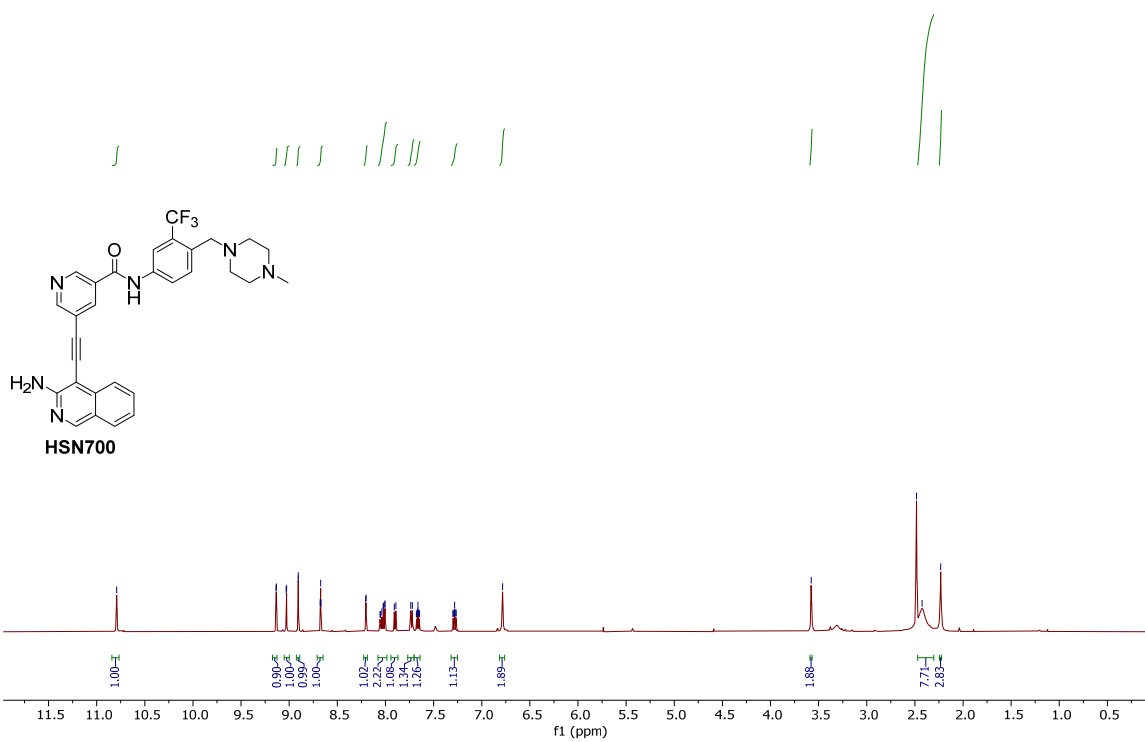

HSN700.2.fid  
C13 standard parameters, cryoprobe prodigy

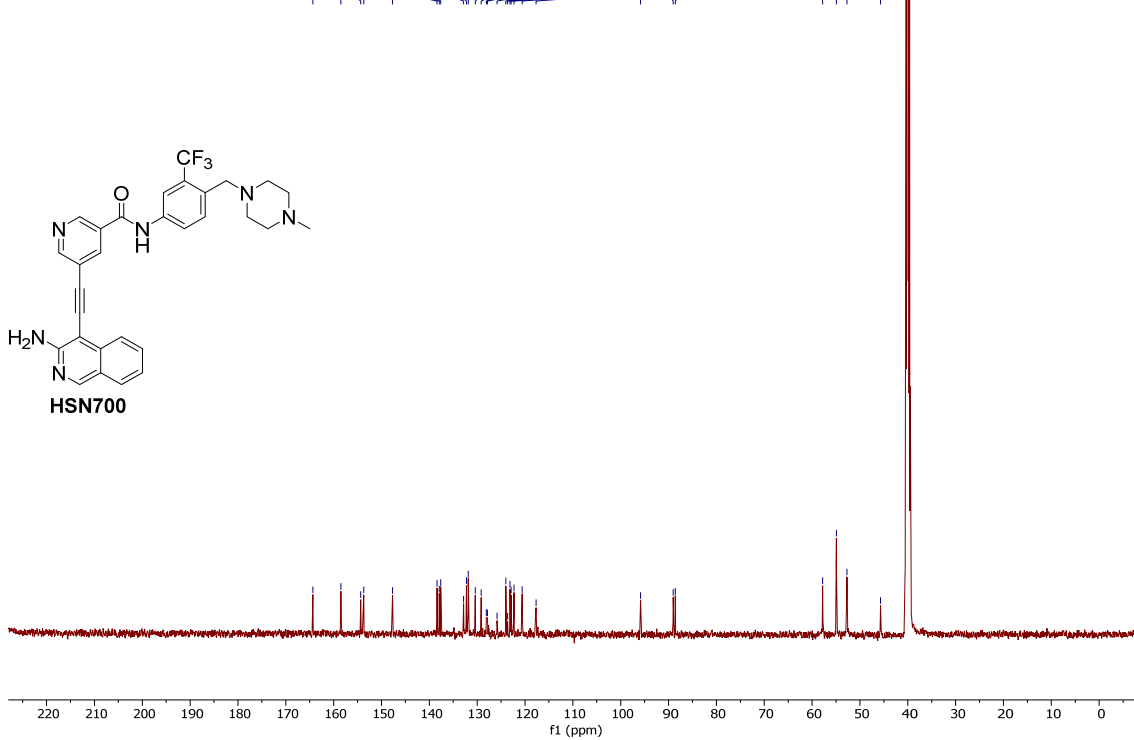

HSN783.1.fid  
H1 standard parameters, cryoprobe prodigy.

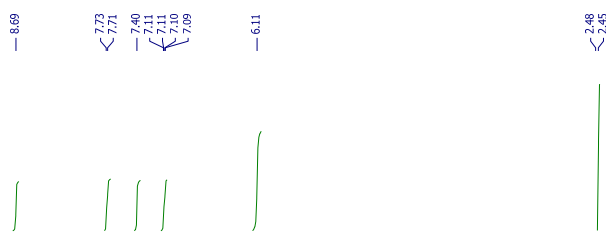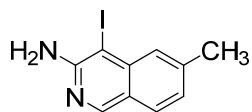

**HSN374**

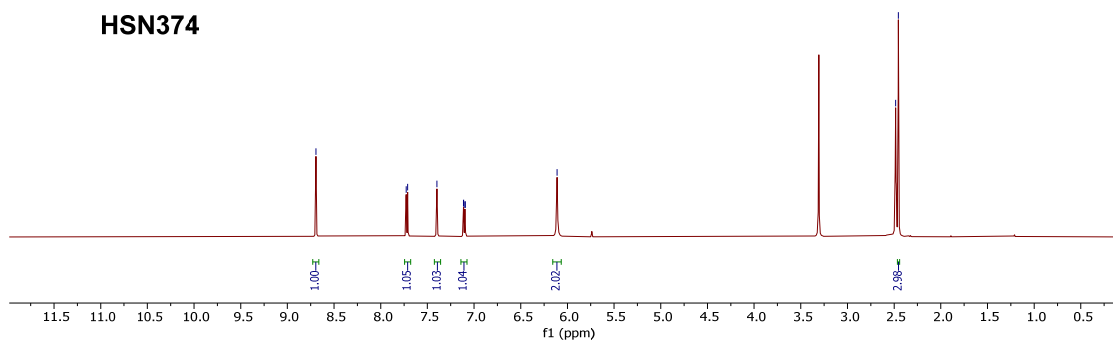

///

HSN783.2.fid  
C13 standard parameters, cryoprobe prodigy, Pulprogig30zr

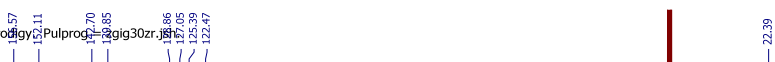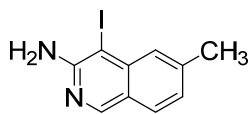

**HSN374**

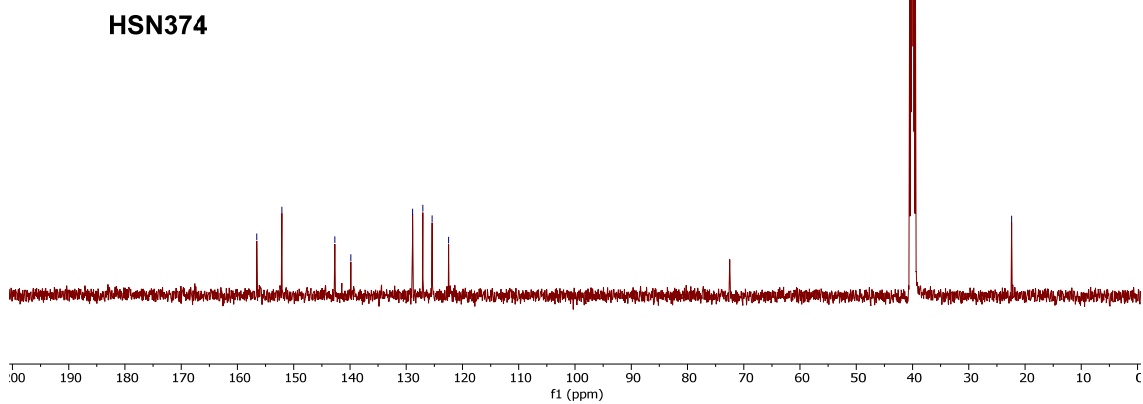

ndayal-744.1.fid

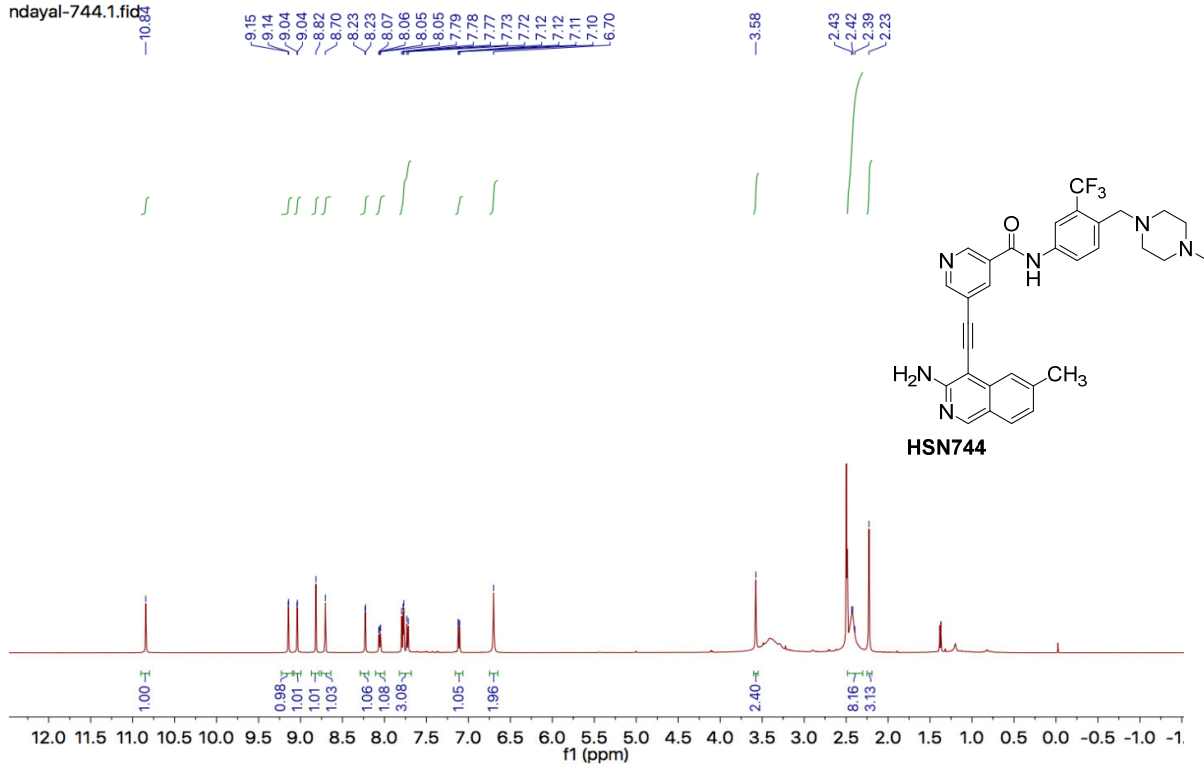

//

ndayal-744.2.fid

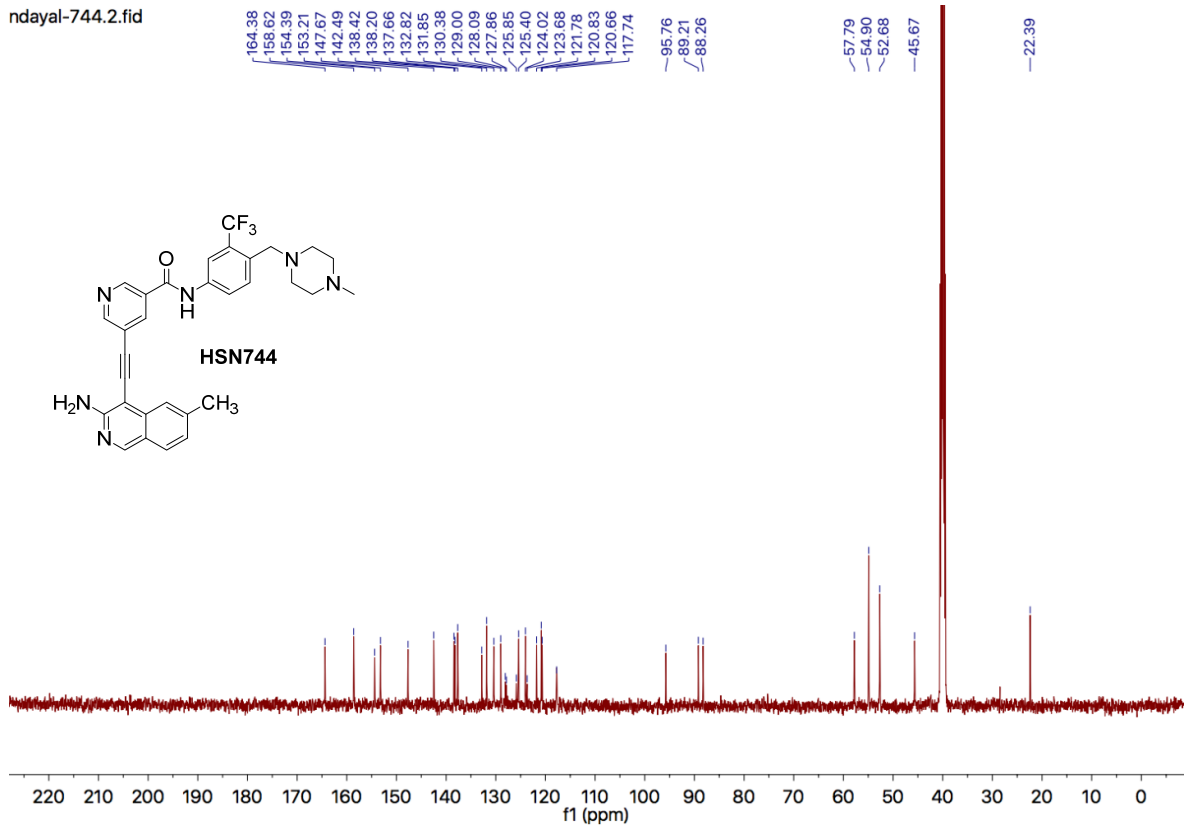



HSN789.1.fid  
 H1 standard parameters, cryoprobe prodig

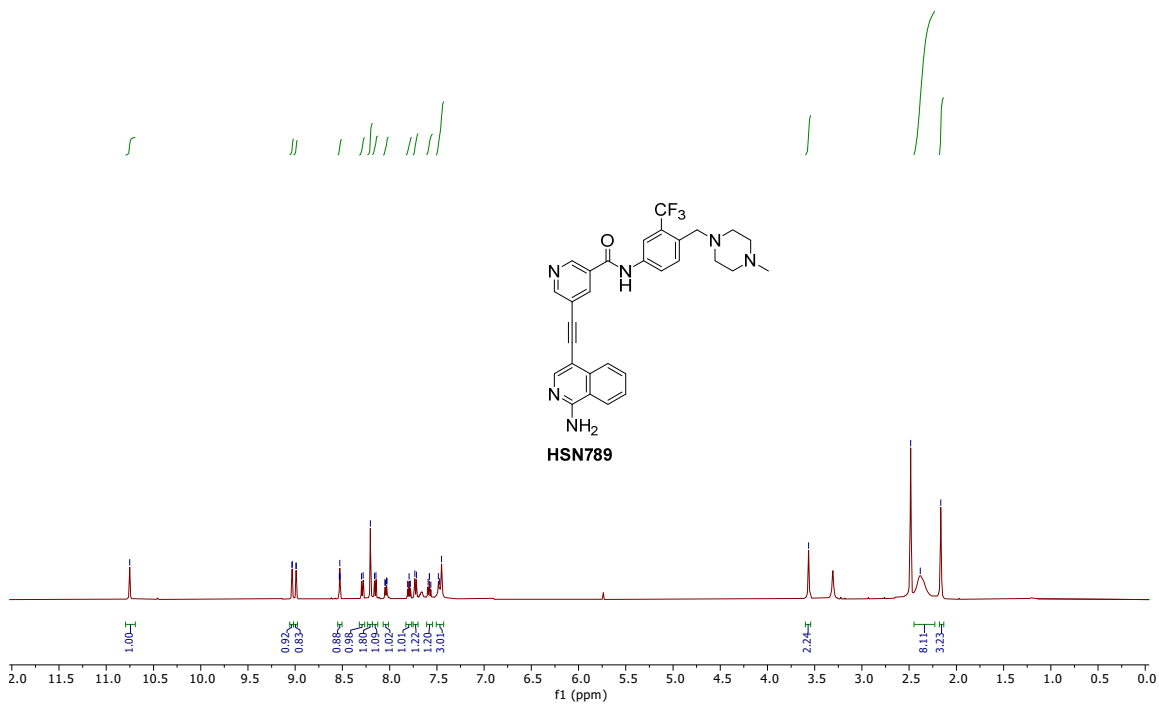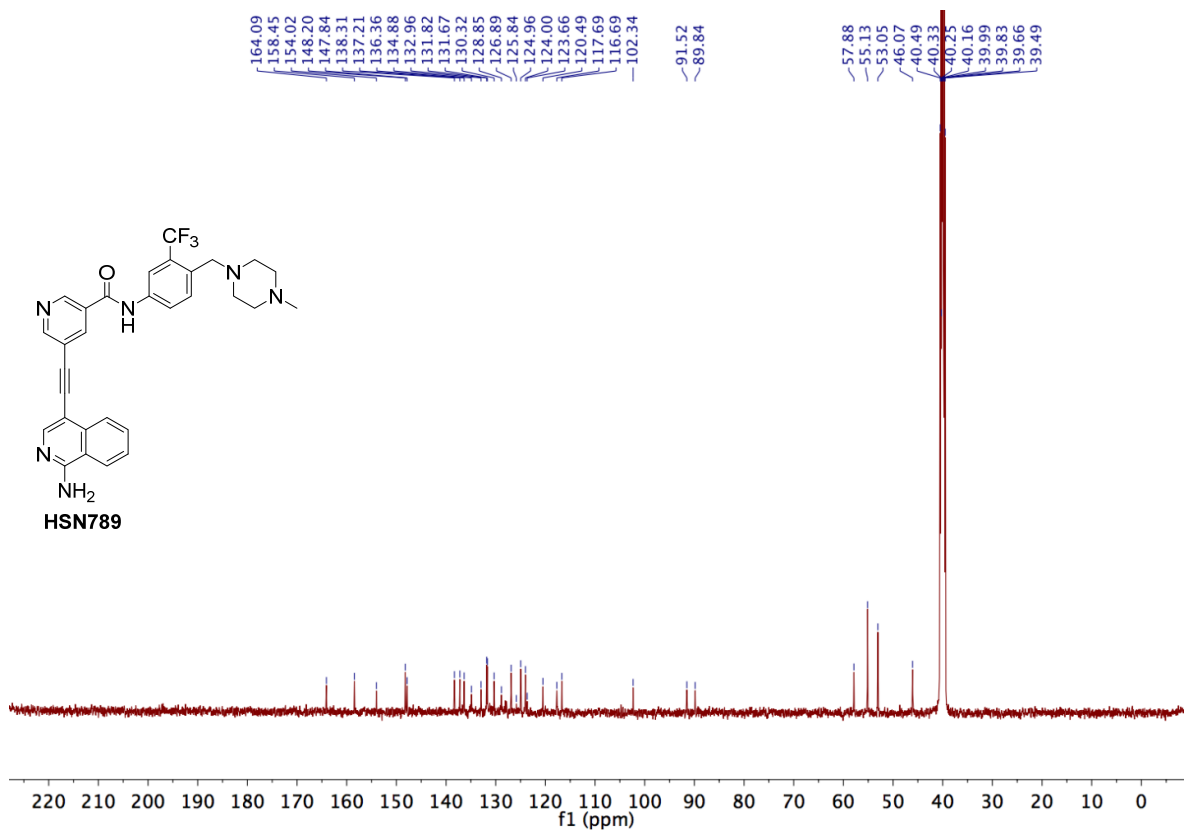

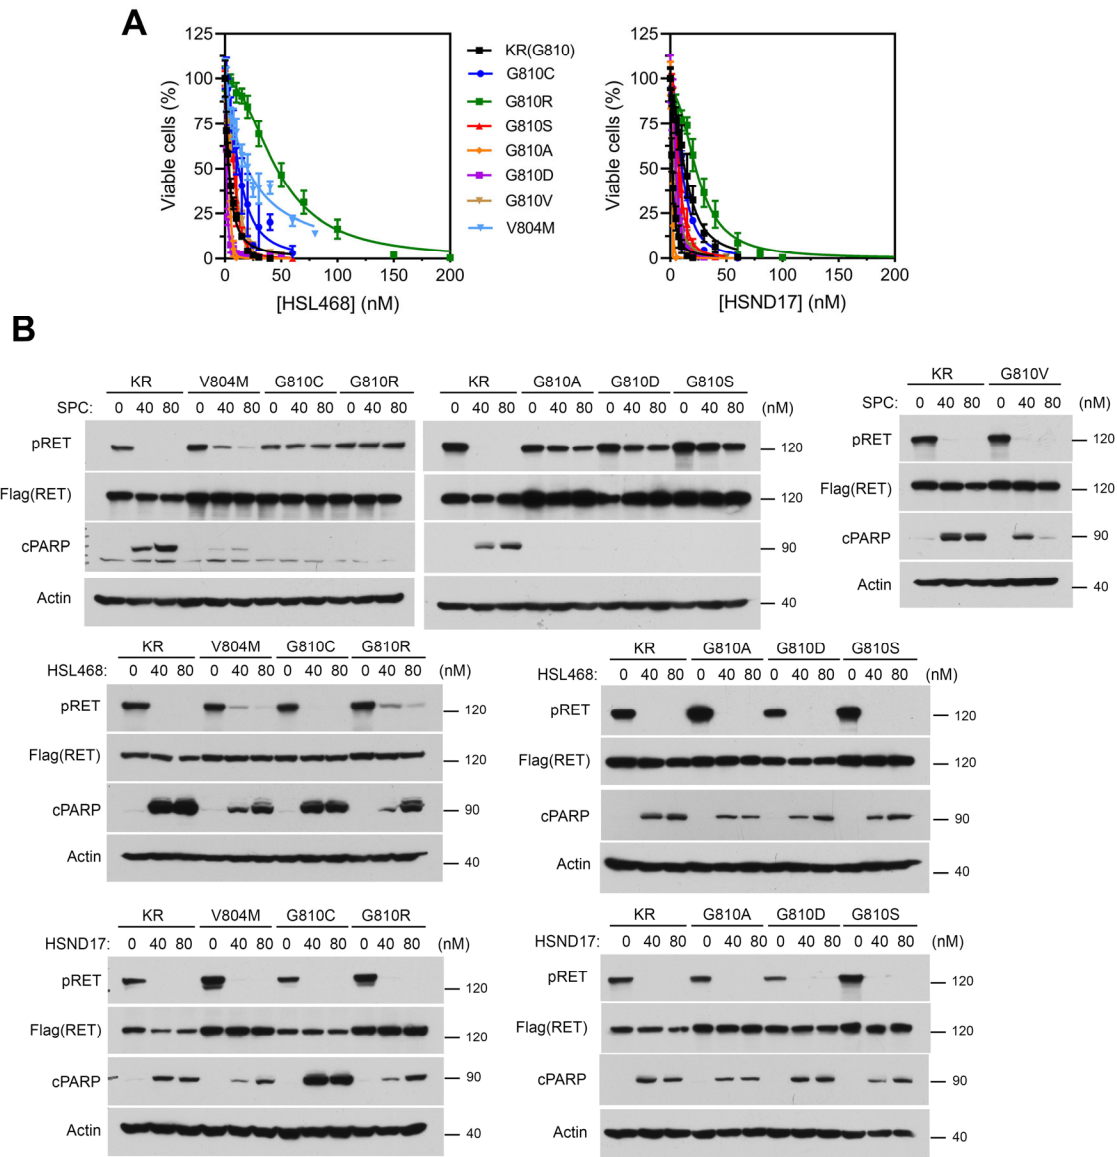

**Fig. S2.** Sensitivity of different G810 mutants to LOXO292, HSL468 and HSND17. **A**, IC<sub>50</sub> curves of B/KR and G810 mutant cells to HSL468 and HSND17. **B**, Immunoblotting analyses of RET TKIs on inhibition of KR and its G810 mutants. For analysis of pRET, cells were treated with the indicated concentrations of compounds for 4 h, whereas for cPARP analysis, cells were treated for 16 h. SPC, Selpercatinib

**Table S2.** Eurofins KINOMEScan™ testing with 10 nM compound concentration.

**Kinome panel selectivity:** The kinome selectivities of three compounds and ponatinib, which is an FDA approved drug with alkynyl aryl motif, were evaluated at the Contract Research Organization, Eurofins, against ~450 kinases, using their gold standard KINOMEScan™ screening platform. The KINOMEScan™ screening platform uses a proprietary active site-directed competition binding assay to quantitatively measure interactions between test compounds and more than 450 human kinases and disease relevant mutant variants. Active site or allosteric binders prevent kinase binding to the immobilized ligand, and therefore the amount of the kinase captured on the solid support, as a percentage of control (no added compound) correlates to binding affinity. Compounds with %Ctr (i.e. control) = 100% denote no binding whereas %Ctr (i.e. control) → 0% denote very strong binders. The compounds were tested at 10 nM and 100 nM.

| Kinase                        | % of control at 10 nM |        |        |        |
|-------------------------------|-----------------------|--------|--------|--------|
|                               | Ponatinib             | HSL468 | HSL476 | HSN608 |
| AAK1                          | 100                   | 100    | 90     | 90     |
| ABL1(E255K)-phosphorylated    | 19                    | 11     | 20     | 14     |
| ABL1(F317I)-nonphosphorylated | 16                    | 0      | 4.8    | 4.4    |
| ABL1(F317I)-phosphorylated    | 25                    | 23     | 14     | 16     |
| ABL1(F317L)-nonphosphorylated | 13                    | 0      | 3.2    | 0.4    |
| ABL1(F317L)-phosphorylated    | 5.3                   | 7.5    | 6.8    | 1.3    |
| ABL1(H396P)-nonphosphorylated | 1.3                   | 0      | 0.4    | 0.1    |
| ABL1(H396P)-phosphorylated    | 17                    | 6.7    | 11     | 7.9    |
| ABL1(M351T)-phosphorylated    | 11                    | 7.9    | 10     | 2.8    |
| ABL1(Q252H)-nonphosphorylated | 7.6                   | 0      | 2.6    | 3.3    |
| ABL1(Q252H)-phosphorylated    | 18                    | 6.9    | 16     | 14     |
| ABL1(T315I)-nonphosphorylated | 11                    | 0      | 5.5    | 5.5    |
| ABL1(T315I)-phosphorylated    | 17                    | 9.8    | 12     | 3.8    |
| ABL1(Y253F)-phosphorylated    | 14                    | 3.7    | 6.5    | 4.6    |
| ABL1-nonphosphorylated        | 7.7                   | 0.6    | 2      | 1.4    |
| ABL1-phosphorylated           | 16                    | 5.5    | 6.7    | 5.5    |
| ABL2                          | 37                    | 23     | 32     | 15     |
| ACVR1                         | 100                   | 100    | 100    | 100    |
| ACVR1B                        | 95                    | 100    | 84     | 100    |
| ACVR2A                        | 99                    | 100    | 100    | 100    |
| ACVR2B                        | 94                    | 100    | 96     | 100    |
| ACVRL1                        | 100                   | 100    | 100    | 100    |
| ADCK3                         | 100                   | 100    | 100    | 100    |
| ADCK4                         | 100                   | 95     | 95     | 100    |
| AKT1                          | 88                    | 100    | 100    | 100    |
| AKT2                          | 99                    | 77     | 100    | 92     |
| AKT3                          | 100                   | 86     | 78     | 98     |
| ALK                           | 96                    | 100    | 100    | 100    |
| ALK(C1156Y)                   | 87                    | 70     | 100    | 100    |
| ALK(L1196M)                   | 91                    | 64     | 98     | 91     |
| AMPK-alpha1                   | 100                   | 82     | 95     | 94     |
| AMPK-alpha2                   | 100                   | 50     | 100    | 100    |
| ANKK1                         | 100                   | 100    | 69     | 70     |
| ARK5                          | 94                    | 92     | 100    | 79     |

|               |     |     |     |     |
|---------------|-----|-----|-----|-----|
| ASK1          | 100 | 97  | 72  | 100 |
| ASK2          | 96  | 97  | 96  | 97  |
| AURKA         | 86  | 95  | 93  | 100 |
| AURKB         | 100 | 100 | 93  | 47  |
| AURKC         | 100 | 61  | 85  | 74  |
| AXL           | 90  | 92  | 36  | 49  |
| BIKE          | 100 | 94  | 87  | 84  |
| BLK           | 8.4 | 5.1 | 6.5 | 12  |
| BMPR1A        | 87  | 100 | 94  | 95  |
| BMPR1B        | 100 | 98  | 75  | 82  |
| BMPR2         | 94  | 100 | 100 | 100 |
| BMX           | 100 | 100 | 100 | 100 |
| BRAF          | 55  | 51  | 48  | 25  |
| BRAF(V600E)   | 28  | 30  | 28  | 11  |
| BRK           | 98  | 85  | 97  | 100 |
| BRSK1         | 97  | 96  | 100 | 100 |
| BRSK2         | 93  | 100 | 72  | 84  |
| BTK           | 85  | 84  | 100 | 89  |
| BUB1          | 89  | 100 | 100 | 100 |
| CAMK1         | 100 | 100 | 74  | 83  |
| CAMK1B        | 91  | 92  | 99  | 91  |
| CAMK1D        | 100 | 100 | 92  | 95  |
| CAMK1G        | 100 | 95  | 92  | 95  |
| CAMK2A        | 100 | 100 | 100 | 100 |
| CAMK2B        | 100 | 100 | 100 | 100 |
| CAMK2D        | 100 | 87  | 100 | 100 |
| CAMK2G        | 100 | 100 | 83  | 100 |
| CAMK4         | 100 | 100 | 100 | 100 |
| CAMKK1        | 100 | 89  | 70  | 95  |
| CAMKK2        | 90  | 93  | 83  | 98  |
| CASK          | 83  | 90  | 88  | 93  |
| CDC2L1        | 93  | 94  | 86  | 81  |
| CDC2L2        | 92  | 100 | 97  | 93  |
| CDC2L5        | 44  | 49  | 49  | 86  |
| CDK11         | 56  | 97  | 72  | 69  |
| CDK2          | 100 | 100 | 82  | 93  |
| CDK3          | 100 | 83  | 77  | 100 |
| CDK4          | 85  | 81  | 83  | 71  |
| CDK4-cyclinD1 | 99  | 100 | 93  | 93  |
| CDK4-cyclinD3 | 100 | 94  | 97  | 91  |
| CDK5          | 100 | 100 | 95  | 100 |
| CDK7          | 82  | 11  | 10  | 47  |
| CDK8          | 28  | 48  | 56  | 40  |
| CDK9          | 97  | 70  | 97  | 95  |
| CDKL1         | 84  | 79  | 85  | 74  |
| CDKL2         | 24  | 41  | 10  | 77  |

|                           |     |     |     |     |
|---------------------------|-----|-----|-----|-----|
| CDKL3                     | 100 | 54  | 68  | 94  |
| CDKL5                     | 100 | 100 | 88  | 82  |
| CHEK1                     | 94  | 100 | 100 | 99  |
| CHEK2                     | 91  | 93  | 88  | 100 |
| CIT                       | 97  | 100 | 100 | 100 |
| CLK1                      | 100 | 78  | 59  | 66  |
| CLK2                      | 91  | 100 | 100 | 100 |
| CLK3                      | 100 | 100 | 81  | 79  |
| CLK4                      | 77  | 57  | 59  | 38  |
| CSF1R                     | 24  | 15  | 23  | 5.5 |
| CSF1R-autoinhibited       | 90  | 96  | 100 | 93  |
| CSK                       | 88  | 100 | 76  | 74  |
| CSNK1A1                   | 90  | 59  | 89  | 100 |
| CSNK1A1L                  | 91  | 100 | 89  | 100 |
| CSNK1D                    | 99  | 100 | 100 | 100 |
| CSNK1E                    | 100 | 100 | 100 | 82  |
| CSNK1G1                   | 100 | 97  | 100 | 100 |
| CSNK1G2                   | 96  | 100 | 100 | 100 |
| CSNK1G3                   | 100 | 100 | 79  | 82  |
| CSNK2A1                   | 100 | 100 | 94  | 100 |
| CSNK2A2                   | 87  | 95  | 86  | 100 |
| CTK                       | 38  | 100 | 100 | 95  |
| DAPK1                     | 97  | 73  | 59  | 89  |
| DAPK2                     | 100 | 100 | 100 | 100 |
| DAPK3                     | 100 | 100 | 100 | 100 |
| DCAMKL1                   | 100 | 100 | 85  | 92  |
| DCAMKL2                   | 91  | 100 | 95  | 88  |
| DCAMKL3                   | 100 | 100 | 100 | 100 |
| DDR1                      | 2.2 | 0.3 | 3.3 | 0   |
| DDR2                      | 6.2 | 2.2 | 6.3 | 2.1 |
| DLK                       | 80  | 74  | 77  | 82  |
| DMPK                      | 96  | 84  | 89  | 93  |
| DMPK2                     | 89  | 80  | 100 | 85  |
| DRAK1                     | 100 | 94  | 100 | 78  |
| DRAK2                     | 100 | 100 | 100 | 100 |
| DYRK1A                    | 100 | 89  | 83  | 87  |
| DYRK1B                    | 93  | 100 | 100 | 88  |
| DYRK2                     | 71  | 100 | 88  | 74  |
| EGFR                      | 100 | 77  | 85  | 98  |
| EGFR(E746-A750del)        | 88  | 100 | 92  | 100 |
| EGFR(G719C)               | 92  | 100 | 81  | 94  |
| EGFR(G719S)               | 91  | 100 | 92  | 95  |
| EGFR(L747-E749del, A750P) | 83  | 80  | 100 | 78  |
| EGFR(L747-S752del, P753S) | 77  | 88  | 91  | 100 |
| EGFR(L747-T751del,Sins)   | 83  | 89  | 67  | 100 |
| EGFR(L858R)               | 100 | 82  | 99  | 100 |

|                    |     |     |     |     |
|--------------------|-----|-----|-----|-----|
| EGFR(L858R,T790M)  | 91  | 100 | 24  | 7.6 |
| EGFR(L861Q)        | 90  | 100 | 72  | 87  |
| EGFR(S752-I759del) | 85  | 99  | 72  | 74  |
| EGFR(T790M)        | 72  | 98  | 24  | 84  |
| EIF2AK1            | 85  | 91  | 100 | 86  |
| EPHA1              | 100 | 84  | 100 | 92  |
| EPHA2              | 80  | 100 | 100 | 100 |
| EPHA3              | 16  | 89  | 100 | 84  |
| EPHA4              | 93  | 92  | 84  | 100 |
| EPHA5              | 100 | 93  | 100 | 100 |
| EPHA6              | 98  | 96  | 89  | 100 |
| EPHA7              | 100 | 100 | 100 | 97  |
| EPHA8              | 14  | 60  | 48  | 60  |
| EPHB1              | 100 | 100 | 100 | 91  |
| EPHB2              | 96  | 100 | 95  | 100 |
| EPHB3              | 100 | 100 | 100 | 100 |
| EPHB4              | 99  | 100 | 94  | 100 |
| EPHB6              | 96  | 100 | 100 | 100 |
| ERBB2              | 75  | 85  | 71  | 68  |
| ERBB3              | 86  | 100 | 100 | 77  |
| ERBB4              | 100 | 100 | 85  | 94  |
| ERK1               | 100 | 100 | 100 | 100 |
| ERK2               | 100 | 98  | 100 | 100 |
| ERK3               | 91  | 91  | 100 | 91  |
| ERK4               | 82  | 79  | 98  | 92  |
| ERK5               | 80  | 92  | 89  | 100 |
| ERK8               | 100 | 100 | 69  | 79  |
| ERN1               | 85  | 100 | 100 | 95  |
| FAK                | 100 | 100 | 100 | 100 |
| FER                | 100 | 100 | 92  | 88  |
| FES                | 100 | 100 | 87  | 100 |
| FGFR1              | 50  | 37  | 58  | 49  |
| FGFR2              | 100 | 70  | 92  | 96  |
| FGFR3              | 100 | 100 | 99  | 100 |
| FGFR3(G697C)       | 100 | 92  | 98  | 97  |
| FGFR4              | 100 | 77  | 90  | 85  |
| FGR                | 74  | 62  | 32  | 81  |
| FLT1               | 100 | 93  | 81  | 69  |
| FLT3               | 23  | 9.1 | 10  | 2.7 |
| FLT3(D835H)        | 54  | 42  | 56  | 36  |
| FLT3(D835V)        | 82  | 30  | 14  | 11  |
| FLT3(D835Y)        | 83  | 21  | 59  | 28  |
| FLT3(ITD)          | 66  | 24  | 66  | 20  |
| FLT3(ITD,D835V)    | 96  | 100 | 55  | 58  |
| FLT3(ITD,F691L)    | 62  | 65  | 54  | 29  |
| FLT3(K663Q)        | 10  | 15  | 22  | 5.9 |

|                              |     |     |     |     |
|------------------------------|-----|-----|-----|-----|
| FLT3(N841I)                  | 7.4 | 0.3 | 14  | 4.6 |
| FLT3(R834Q)                  | 9.6 | 4.8 | 9.2 | 4   |
| FLT3-autoinhibited           | 99  | 75  | 75  | 47  |
| FLT4                         | 93  | 70  | 88  | 81  |
| FRK                          | 93  | 68  | 78  | 71  |
| FYN                          | 100 | 77  | 63  | 88  |
| GAK                          | 100 | 98  | 100 | 100 |
| GCN2(Kin.Dom.2,S808G)        | 100 | 84  | 100 | 83  |
| GRK1                         | 97  | 88  | 81  | 84  |
| GRK2                         | 93  | 100 | 76  | 100 |
| GRK3                         | 89  | 93  | 100 | 85  |
| GRK4                         | 100 | 64  | 89  | 82  |
| GRK7                         | 90  | 100 | 74  | 66  |
| GSK3A                        | 100 | 86  | 91  | 94  |
| GSK3B                        | 98  | 100 | 100 | 87  |
| HASPIN                       | 67  | 93  | 97  | 85  |
| HCK                          | 20  | 64  | 52  | 83  |
| HIPK1                        | 93  | 72  | 16  | 79  |
| HIPK2                        | 100 | 100 | 20  | 92  |
| HIPK3                        | 98  | 100 | 11  | 68  |
| HIPK4                        | 100 | 78  | 70  | 60  |
| HPK1                         | 82  | 82  | 48  | 50  |
| HUNK                         | 38  | 90  | 100 | 90  |
| ICK                          | 94  | 100 | 69  | 84  |
| IGF1R                        | 100 | 93  | 95  | 99  |
| IKK-alpha                    | 68  | 83  | 15  | 42  |
| IKK-beta                     | 76  | 100 | 22  | 34  |
| IKK-epsilon                  | 75  | 100 | 90  | 91  |
| INSR                         | 83  | 86  | 34  | 87  |
| INSRR                        | 92  | 89  | 91  | 81  |
| IRAK1                        | 92  | 100 | 9.5 | 57  |
| IRAK3                        | 93  | 94  | 100 | 100 |
| IRAK4                        | 100 | 100 | 57  | 65  |
| ITK                          | 100 | 100 | 38  | 89  |
| JAK1(JH1domain-catalytic)    | 100 | 88  | 100 | 51  |
| JAK1(JH2domain-pseudokinase) | 86  | 100 | 61  | 55  |
| JAK2(JH1domain-catalytic)    | 93  | 71  | 76  | 66  |
| JAK3(JH1domain-catalytic)    | 44  | 35  | 36  | 32  |
| JNK1                         | 91  | 81  | 100 | 91  |
| JNK2                         | 77  | 65  | 77  | 72  |
| JNK3                         | 91  | 88  | 88  | 93  |
| KIT                          | 33  | 17  | 38  | 13  |
| KIT(A829P)                   | 4.8 | 13  | 13  | 11  |
| KIT(D816H)                   | 83  | 76  | 55  | 72  |
| KIT(D816V)                   | 100 | 100 | 100 | 100 |
| KIT(L576P)                   | 18  | 20  | 26  | 7   |

|                   |     |     |     |     |
|-------------------|-----|-----|-----|-----|
| KIT(V559D)        | 22  | 12  | 25  | 5.7 |
| KIT(V559D,T670I)  | 20  | 20  | 27  | 18  |
| KIT(V559D,V654A)  | 94  | 87  | 97  | 77  |
| KIT-autoinhibited | 87  | 86  | 86  | 84  |
| LATS1             | 92  | 83  | 100 | 100 |
| LATS2             | 100 | 100 | 98  | 100 |
| LCK               | 12  | 45  | 8.3 | 11  |
| LIMK1             | 100 | 100 | 83  | 100 |
| LIMK2             | 100 | 84  | 100 | 92  |
| LKB1              | 100 | 98  | 100 | 100 |
| LOK               | 2.2 | 0.3 | 1.6 | 1.7 |
| LRRK2             | 100 | 100 | 100 | 88  |
| LRRK2(G2019S)     | 92  | 91  | 100 | 69  |
| LTK               | 11  | 77  | 97  | 96  |
| LYN               | 38  | 32  | 38  | 56  |
| LZK               | 79  | 95  | 82  | 83  |
| MAK               | 52  | 74  | 87  | 100 |
| MAP3K1            | 94  | 100 | 98  | 87  |
| MAP3K15           | 100 | 100 | 87  | 81  |
| MAP3K2            | 86  | 99  | 67  | 80  |
| MAP3K3            | 74  | 67  | 33  | 79  |
| MAP3K4            | 100 | 100 | 96  | 100 |
| MAP4K2            | 36  | 89  | 20  | 88  |
| MAP4K3            | 100 | 93  | 76  | 100 |
| MAP4K4            | 76  | 96  | 68  | 100 |
| MAP4K5            | 91  | 100 | 88  | 99  |
| MAPKAPK2          | 100 | 79  | 98  | 77  |
| MAPKAPK5          | 100 | 100 | 80  | 79  |
| MARK1             | 87  | 85  | 61  | 60  |
| MARK2             | 79  | 92  | 100 | 100 |
| MARK3             | 89  | 90  | 100 | 100 |
| MARK4             | 100 | 100 | 67  | 81  |
| MAST1             | 74  | 56  | 92  | 99  |
| MEK1              | 93  | 100 | 93  | 100 |
| MEK2              | 96  | 100 | 100 | 100 |
| MEK3              | 100 | 100 | 86  | 100 |
| MEK4              | 100 | 100 | 95  | 100 |
| MEK5              | 58  | 36  | 52  | 72  |
| MEK6              | 100 | 83  | 72  | 92  |
| MELK              | 90  | 83  | 100 | 89  |
| MERTK             | 100 | 56  | 48  | 88  |
| MET               | 100 | 93  | 100 | 100 |
| MET(M1250T)       | 100 | 97  | 90  | 91  |
| MET(Y1235D)       | 100 | 100 | 100 | 86  |
| MINK              | 81  | 100 | 60  | 71  |
| MKK7              | 100 | 100 | 100 | 100 |



|           |     |     |     |     |
|-----------|-----|-----|-----|-----|
| MKNK1     | 93  | 54  | 82  | 56  |
| MKNK2     | 66  | 4.1 | 32  | 16  |
| MLCK      | 100 | 100 | 100 | 94  |
| MLK1      | 100 | 100 | 100 | 100 |
| MLK2      | 92  | 97  | 70  | 70  |
| MLK3      | 96  | 100 | 97  | 90  |
| MRCKA     | 100 | 91  | 98  | 100 |
| MRCKB     | 99  | 100 | 100 | 100 |
| MST1      | 100 | 80  | 77  | 100 |
| MST1R     | 67  | 96  | 100 | 100 |
| MST2      | 68  | 92  | 100 | 100 |
| MST3      | 98  | 87  | 63  | 100 |
| MST4      | 84  | 100 | 14  | 71  |
| MTOR      | 100 | 100 | 100 | 100 |
| MUSK      | 69  | 35  | 72  | 36  |
| MYLK      | 100 | 36  | 100 | 90  |
| MYLK2     | 86  | 100 | 100 | 83  |
| MYLK4     | 96  | 89  | 90  | 87  |
| MYO3A     | 100 | 70  | 100 | 100 |
| MYO3B     | 80  | 72  | 100 | 100 |
| NDR1      | 89  | 100 | 88  | 66  |
| NDR2      | 100 | 91  | 100 | 100 |
| NEK1      | 92  | 79  | 85  | 89  |
| NEK10     | 91  | 100 | 88  | 100 |
| NEK11     | 92  | 100 | 69  | 94  |
| NEK2      | 100 | 91  | 100 | 100 |
| NEK3      | 100 | 94  | 76  | 90  |
| NEK4      | 94  | 100 | 91  | 72  |
| NEK5      | 69  | 77  | 100 | 91  |
| NEK6      | 100 | 99  | 100 | 100 |
| NEK7      | 94  | 100 | 61  | 100 |
| NEK9      | 97  | 96  | 54  | 76  |
| NIK       | 96  | 98  | 91  | 89  |
| NIM1      | 82  | 98  | 92  | 76  |
| NLK       | 82  | 54  | 100 | 100 |
| OSR1      | 98  | 100 | 76  | 87  |
| p38-alpha | 90  | 87  | 75  | 65  |
| p38-beta  | 100 | 100 | 100 | 100 |
| p38-delta | 64  | 84  | 57  | 100 |
| p38-gamma | 100 | 93  | 6.3 | 85  |
| PAK1      | 100 | 100 | 88  | 96  |
| PAK2      | 100 | 86  | 90  | 82  |
| PAK3      | 78  | 100 | 51  | 49  |
| PAK4      | 98  | 100 | 83  | 90  |
| PAK6      | 100 | 100 | 80  | 71  |
| PAK7      | 90  | 78  | 96  | 86  |

|                       |     |     |     |     |
|-----------------------|-----|-----|-----|-----|
| PCTK1                 | 100 | 77  | 73  | 81  |
| PCTK2                 | 76  | 100 | 73  | 80  |
| PCTK3                 | 86  | 100 | 89  | 93  |
| PDGFRA                | 33  | 12  | 9.5 | 4.9 |
| PDGFRB                | 18  | 10  | 24  | 5.9 |
| PDPK1                 | 86  | 100 | 100 | 100 |
| PFCDPK1(P.falciparum) | 74  | 100 | 100 | 97  |
| PFPK5(P.falciparum)   | 68  | 97  | 97  | 84  |
| PFTAIRE2              | 98  | 89  | 62  | 87  |
| PFTK1                 | 91  | 88  | 68  | 97  |
| PHKG1                 | 99  | 100 | 100 | 100 |
| PHKG2                 | 100 | 100 | 100 | 100 |
| PIK3C2B               | 100 | 100 | 80  | 79  |
| PIK3C2G               | 95  | 100 | 90  | 100 |
| PIK3CA                | 85  | 85  | 91  | 95  |
| PIK3CA(C420R)         | 100 | 94  | 89  | 84  |
| PIK3CA(E542K)         | 100 | 74  | 87  | 85  |
| PIK3CA(E545A)         | 100 | 83  | 100 | 100 |
| PIK3CA(E545K)         | 94  | 74  | 89  | 75  |
| PIK3CA(H1047L)        | 100 | 70  | 100 | 100 |
| PIK3CA(H1047Y)        | 83  | 80  | 100 | 69  |
| PIK3CA(I800L)         | 95  | 56  | 88  | 54  |
| PIK3CA(M1043I)        | 83  | 100 | 89  | 100 |
| PIK3CA(Q546K)         | 82  | 71  | 73  | 72  |
| PIK3CB                | 100 | 100 | 100 | 100 |
| PIK3CD                | 88  | 100 | 67  | 87  |
| PIK3CG                | 100 | 93  | 70  | 72  |
| PIK4CB                | 97  | 100 | 79  | 82  |
| PIKFYVE               | 97  | 99  | 84  | 95  |
| PIM1                  | 98  | 98  | 91  | 89  |
| PIM2                  | 86  | 100 | 100 | 93  |
| PIM3                  | 98  | 100 | 79  | 84  |
| PIP5K1A               | 100 | 78  | 100 | 100 |
| PIP5K1C               | 100 | 97  | 68  | 82  |
| PIP5K2B               | 100 | 100 | 100 | 100 |
| PIP5K2C               | 100 | 100 | 100 | 99  |
| PKAC-alpha            | 92  | 100 | 100 | 87  |
| PKAC-beta             | 100 | 99  | 100 | 100 |
| PKMYT1                | 100 | 86  | 100 | 93  |
| PKN1                  | 91  | 96  | 88  | 100 |
| PKN2                  | 93  | 84  | 89  | 100 |
| PKNB(M.tuberculosis)  | 87  | 97  | 79  | 96  |
| PLK1                  | 80  | 100 | 74  | 70  |
| PLK2                  | 100 | 100 | 90  | 87  |
| PLK3                  | 99  | 100 | 84  | 91  |
| PLK4                  | 88  | 75  | 100 | 100 |

|                               |           |            |            |            |
|-------------------------------|-----------|------------|------------|------------|
| PRKCD                         | 99        | 95         | 88         | 80         |
| PRKCE                         | 70        | 85         | 100        | 84         |
| PRKCH                         | 78        | 100        | 75         | 64         |
| PRKCI                         | 94        | 88         | 92         | 71         |
| PRKCQ                         | 100       | 100        | 100        | 100        |
| PRKD1                         | 93        | 100        | 100        | 100        |
| PRKD2                         | 100       | 84         | 98         | 92         |
| PRKD3                         | 100       | 92         | 74         | 100        |
| PRKG1                         | 100       | 70         | 100        | 100        |
| PRKG2                         | 89        | 92         | 93         | 74         |
| PRKR                          | 91        | 66         | 77         | 78         |
| PRKX                          | 100       | 82         | 84         | 99         |
| PRP4                          | 79        | 100        | 100        | 88         |
| PYK2                          | 89        | 100        | 36         | 100        |
| QSK                           | 100       | 75         | 100        | 100        |
| RAF1                          | 93        | 100        | 88         | 55         |
| <b>RET</b>                    | <b>34</b> | <b>8.8</b> | <b>2.6</b> | <b>1.8</b> |
| RET(M918T)                    | 42        | 2.5        | 4.1        | 2.8        |
| RET(V804L)                    | 91        | 42         | 18         | 34         |
| RET(V804M)                    | 90        | 54         | 12         | 16         |
| RIOK1                         | 100       | 95         | 68         | 77         |
| RIOK2                         | 100       | 100        | 85         | 83         |
| RIOK3                         | 98        | 89         | 62         | 71         |
| RIPK1                         | 82        | 88         | 100        | 86         |
| RIPK2                         | 92        | 100        | 96         | 98         |
| RIPK4                         | 87        | 85         | 55         | 90         |
| RIPK5                         | 100       | 100        | 54         | 93         |
| ROCK1                         | 100       | 94         | 77         | 86         |
| ROCK2                         | 100       | 100        | 80         | 94         |
| ROS1                          | 96        | 100        | 75         | 87         |
| RPS6KA4(Kin.Dom.1-N-terminal) | 94        | 81         | 100        | 100        |
| RPS6KA4(Kin.Dom.2-C-terminal) | 100       | 100        | 89         | 88         |
| RPS6KA5(Kin.Dom.1-N-terminal) | 100       | 100        | 76         | 70         |
| RPS6KA5(Kin.Dom.2-C-terminal) | 100       | 75         | 100        | 92         |
| RSK1(Kin.Dom.1-N-terminal)    | 96        | 97         | 82         | 81         |
| RSK1(Kin.Dom.2-C-terminal)    | 91        | 84         | 60         | 100        |
| RSK2(Kin.Dom.1-N-terminal)    | 97        | 96         | 73         | 73         |
| RSK2(Kin.Dom.2-C-terminal)    | 82        | 100        | 100        | 100        |
| RSK3(Kin.Dom.1-N-terminal)    | 100       | 100        | 83         | 100        |
| RSK3(Kin.Dom.2-C-terminal)    | 100       | 92         | 64         | 73         |
| RSK4(Kin.Dom.1-N-terminal)    | 100       | 88         | 73         | 74         |
| RSK4(Kin.Dom.2-C-terminal)    | 96        | 83         | 66         | 100        |
| S6K1                          | 81        | 72         | 37         | 55         |
| SBK1                          | 56        | 100        | 75         | 93         |
| SGK                           | 90        | 100        | 100        | 88         |
| SgK110                        | 87        | 87         | 100        | 100        |

|                              |     |     |     |     |
|------------------------------|-----|-----|-----|-----|
| SGK2                         | 100 | 100 | 100 | 100 |
| SGK3                         | 89  | 100 | 84  | 90  |
| SIK                          | 89  | 90  | 100 | 91  |
| SIK2                         | 100 | 100 | 76  | 100 |
| SLK                          | 70  | 100 | 59  | 83  |
| SNARK                        | 92  | 100 | 82  | 75  |
| SNRK                         | 96  | 91  | 100 | 75  |
| SRC                          | 76  | 86  | 100 | 80  |
| SRMS                         | 74  | 84  | 90  | 99  |
| SRPK1                        | 100 | 100 | 83  | 82  |
| SRPK2                        | 85  | 77  | 100 | 94  |
| SRPK3                        | 100 | 97  | 96  | 86  |
| STK16                        | 100 | 100 | 88  | 91  |
| STK33                        | 95  | 100 | 98  | 78  |
| STK35                        | 100 | 100 | 96  | 100 |
| STK36                        | 96  | 100 | 100 | 100 |
| STK39                        | 76  | 63  | 93  | 100 |
| SYK                          | 76  | 67  | 63  | 65  |
| TAK1                         | 15  | 4.7 | 4.4 | 27  |
| TAOK1                        | 67  | 77  | 98  | 94  |
| TAOK2                        | 77  | 82  | 98  | 95  |
| TAOK3                        | 72  | 57  | 96  | 84  |
| TBK1                         | 97  | 75  | 84  | 87  |
| TEC                          | 100 | 100 | 100 | 93  |
| TESK1                        | 100 | 100 | 94  | 100 |
| TGFBR1                       | 100 | 88  | 98  | 73  |
| TGFBR2                       | 100 | 100 | 100 | 100 |
| TIE1                         | 12  | 23  | 19  | 19  |
| TIE2                         | 41  | 4.8 | 14  | 5.1 |
| TLK1                         | 84  | 81  | 100 | 100 |
| TLK2                         | 91  | 74  | 72  | 67  |
| TNIK                         | 65  | 82  | 70  | 97  |
| TNK1                         | 79  | 54  | 51  | 84  |
| TNK2                         | 100 | 100 | 100 | 100 |
| TNNI3K                       | 95  | 100 | 93  | 100 |
| TRKA                         | 28  | 16  | 0.3 | 2.5 |
| TRKB                         | 23  | 2.6 | 1.2 | 4.3 |
| TRKC                         | 63  | 17  | 5.6 | 19  |
| TRPM6                        | 100 | 100 | 100 | 89  |
| TSSK1B                       | 100 | 98  | 82  | 96  |
| TSSK3                        | 89  | 100 | 100 | 75  |
| TTK                          | 99  | 100 | 100 | 100 |
| TXK                          | 92  | 100 | 88  | 83  |
| TYK2(JH1domain-catalytic)    | 94  | 77  | 90  | 89  |
| TYK2(JH2domain-pseudokinase) | 90  | 100 | 84  | 99  |
| TYRO3                        | 100 | 100 | 89  | 100 |

|        |     |     |     |     |
|--------|-----|-----|-----|-----|
| ULK1   | 100 | 95  | 82  | 100 |
| ULK2   | 100 | 100 | 100 | 98  |
| ULK3   | 93  | 97  | 50  | 91  |
| VEGFR2 | 45  | 35  | 37  | 33  |
| VPS34  | 75  | 82  | 100 | 98  |
| VRK2   | 96  | 86  | 100 | 85  |
| WEE1   | 98  | 100 | 96  | 100 |
| WEE2   | 95  | 95  | 86  | 100 |
| WNK1   | 97  | 100 | 100 | 86  |
| WNK2   | 88  | 93  | 79  | 92  |
| WNK3   | 97  | 100 | 100 | 100 |
| WNK4   | 89  | 100 | 92  | 100 |
| YANK1  | 89  | 100 | 100 | 80  |
| YANK2  | 75  | 96  | 68  | 60  |
| YANK3  | 100 | 98  | 100 | 88  |
| YES    | 100 | 69  | 91  | 100 |
| YSK1   | 92  | 67  | 85  | 96  |
| YSK4   | 92  | 81  | 22  | 55  |
| ZAK    | 26  | 8.9 | 74  | 12  |
| ZAP70  | 90  | 70  | 95  | 78  |

**Table S3.** Eurofins KINOMEScan™ testing with 100 nM compound concentration

| Kinase                        | % of control at 100 nM |        |        |        |
|-------------------------------|------------------------|--------|--------|--------|
|                               | Ponatinib              | HSL468 | HSL476 | HSN608 |
| AAK1                          | 100                    | 100    | 63     | 91     |
| ABL1(E255K)-phosphorylated    | 2.6                    | 0.6    | 2      | 1.1    |
| ABL1(F317I)-nonphosphorylated | 0                      | 0      | 1.2    | 0.2    |
| ABL1(F317I)-phosphorylated    | 9.1                    | 2.8    | 5.5    | 5.7    |
| ABL1(F317L)-nonphosphorylated | 0                      | 0      | 0      | 0      |
| ABL1(F317L)-phosphorylated    | 1.9                    | 1.2    | 2      | 2.2    |
| ABL1(H396P)-nonphosphorylated | 0                      | 0.1    | 0      | 0      |
| ABL1(H396P)-phosphorylated    | 3.1                    | 0.5    | 1.2    | 0.7    |
| ABL1(M351T)-phosphorylated    | 1.2                    | 3.3    | 2.5    | 2.6    |
| ABL1(Q252H)-nonphosphorylated | 0                      | 0.2    | 0.1    | 0      |
| ABL1(Q252H)-phosphorylated    | 3.1                    | 1      | 0.8    | 1      |
| ABL1(T315I)-nonphosphorylated | 0                      | 0      | 0      | 0.1    |
| ABL1(T315I)-phosphorylated    | 2.6                    | 1      | 1.6    | 2.1    |
| ABL1(Y253F)-phosphorylated    | 2.4                    | 0.4    | 0.6    | 0.5    |
| ABL1-nonphosphorylated        | 1.2                    | 0      | 0.2    | 0.1    |
| ABL1-phosphorylated           | 3.2                    | 0.5    | 0.5    | 0.4    |
| ABL2                          | 4.5                    | 5.4    | 5.5    | 2.5    |
| ACVR1                         | 100                    | 90     | 100    | 100    |
| ACVR1B                        | 100                    | 67     | 100    | 100    |
| ACVR2A                        | 100                    | 100    | 100    | 87     |
| ACVR2B                        | 100                    | 92     | 100    | 83     |
| ACVRL1                        | 100                    | 96     | 100    | 100    |
| ADCK3                         | 100                    | 100    | 100    | 100    |
| ADCK4                         | 100                    | 95     | 98     | 100    |
| AKT1                          | 100                    | 96     | 100    | 100    |
| AKT2                          | 100                    | 97     | 88     | 92     |
| AKT3                          | 100                    | 83     | 82     | 100    |
| ALK                           | 97                     | 92     | 100    | 100    |
| ALK(C1156Y)                   | 92                     | 100    | 77     | 100    |
| ALK(L1196M)                   | 98                     | 100    | 100    | 100    |
| AMPK-alpha1                   | 100                    | 47     | 91     | 71     |
| AMPK-alpha2                   | 100                    | 5.3    | 80     | 69     |
| ANKK1                         | 88                     | 71     | 30     | 100    |
| ARK5                          | 79                     | 81     | 94     | 100    |
| ASK1                          | 100                    | 96     | 100    | 100    |
| ASK2                          | 87                     | 100    | 100    | 94     |
| AURKA                         | 100                    | 76     | 84     | 80     |
| AURKB                         | 100                    | 39     | 47     | 18     |
| AURKC                         | 92                     | 2.1    | 45     | 20     |
| AXL                           | 59                     | 47     | 4.7    | 13     |
| BIKE                          | 100                    | 94     | 97     | 71     |
| BLK                           | 0.6                    | 0.3    | 0.4    | 0.3    |

|               |     |     |     |     |
|---------------|-----|-----|-----|-----|
| BMPR1A        | 100 | 68  | 100 | 100 |
| BMPR1B        | 100 | 100 | 85  | 83  |
| BMPR2         | 100 | 100 | 100 | 100 |
| BMX           | 33  | 79  | 78  | 100 |
| BRAF          | 8.3 | 8.1 | 9.3 | 2.9 |
| BRAF(V600E)   | 2.1 | 3.7 | 2.9 | 0.7 |
| BRK           | 100 | 100 | 100 | 100 |
| BRSK1         | 89  | 100 | 86  | 100 |
| BRSK2         | 100 | 75  | 95  | 100 |
| BTK           | 87  | 100 | 90  | 100 |
| BUB1          | 100 | 100 | 100 | 100 |
| CAMK1         | 100 | 99  | 94  | 87  |
| CAMK1B        | 91  | 100 | 97  | 86  |
| CAMK1D        | 100 | 100 | 100 | 100 |
| CAMK1G        | 100 | 100 | 56  | 88  |
| CAMK2A        | 100 | 88  | 99  | 100 |
| CAMK2B        | 100 | 91  | 100 | 96  |
| CAMK2D        | 100 | 100 | 85  | 100 |
| CAMK2G        | 100 | 100 | 70  | 100 |
| CAMK4         | 100 | 96  | 91  | 100 |
| CAMKK1        | 100 | 83  | 21  | 95  |
| CAMKK2        | 74  | 81  | 35  | 100 |
| CASK          | 82  | 100 | 100 | 92  |
| CDC2L1        | 85  | 81  | 93  | 100 |
| CDC2L2        | 93  | 100 | 87  | 100 |
| CDC2L5        | 5.6 | 13  | 6.5 | 33  |
| CDK11         | 0   | 0.6 | 4.6 | 4.2 |
| CDK2          | 100 | 70  | 21  | 98  |
| CDK3          | 100 | 60  | 24  | 89  |
| CDK4          | 77  | 100 | 81  | 70  |
| CDK4-cyclinD1 | 100 | 98  | 88  | 100 |
| CDK4-cyclinD3 | 100 | 100 | 84  | 96  |
| CDK5          | 100 | 62  | 22  | 100 |
| CDK7          | 51  | 1.1 | 1.3 | 6.6 |
| CDK8          | 0   | 10  | 4.7 | 2   |
| CDK9          | 93  | 67  | 96  | 100 |
| CDKL1         | 99  | 53  | 43  | 91  |
| CDKL2         | 0   | 0   | 0.7 | 21  |
| CDKL3         | 15  | 1.2 | 3.7 | 57  |
| CDKL5         | 100 | 100 | 36  | 97  |
| CHEK1         | 100 | 91  | 100 | 99  |
| CHEK2         | 100 | 57  | 100 | 98  |
| CIT           | 47  | 98  | 100 | 100 |
| CLK1          | 59  | 25  | 56  | 38  |
| CLK2          | 87  | 40  | 40  | 75  |
| CLK3          | 100 | 100 | 96  | 100 |

|                           |     |     |     |     |
|---------------------------|-----|-----|-----|-----|
| CLK4                      | 43  | 4.4 | 25  | 19  |
| CSF1R                     | 1.3 | 0.7 | 0.9 | 0.6 |
| CSF1R-autoinhibited       | 100 | 82  | 87  | 83  |
| CSK                       | 27  | 75  | 69  | 66  |
| CSNK1A1                   | 100 | 69  | 100 | 100 |
| CSNK1A1L                  | 100 | 100 | 100 | 100 |
| CSNK1D                    | 95  | 96  | 100 | 100 |
| CSNK1E                    | 100 | 100 | 100 | 100 |
| CSNK1G1                   | 100 | 91  | 100 | 100 |
| CSNK1G2                   | 97  | 87  | 100 | 100 |
| CSNK1G3                   | 100 | 100 | 100 | 100 |
| CSNK2A1                   | 99  | 100 | 100 | 100 |
| CSNK2A2                   | 100 | 94  | 100 | 100 |
| CTK                       | 58  | 100 | 82  | 95  |
| DAPK1                     | 100 | 92  | 72  | 95  |
| DAPK2                     | 92  | 92  | 100 | 100 |
| DAPK3                     | 100 | 100 | 90  | 100 |
| DCAMKL1                   | 100 | 96  | 91  | 100 |
| DCAMKL2                   | 100 | 89  | 99  | 100 |
| DCAMKL3                   | 100 | 100 | 97  | 100 |
| DDR1                      | 0   | 0.3 | 0   | 0   |
| DDR2                      | 0   | 0.4 | 0.7 | 0   |
| DLK                       | 57  | 93  | 30  | 73  |
| DMPK                      | 100 | 88  | 90  | 100 |
| DMPK2                     | 100 | 100 | 100 | 95  |
| DRAK1                     | 100 | 93  | 87  | 100 |
| DRAK2                     | 100 | 100 | 100 | 100 |
| DYRK1A                    | 100 | 100 | 96  | 92  |
| DYRK1B                    | 69  | 82  | 68  | 49  |
| DYRK2                     | 100 | 54  | 59  | 46  |
| EGFR                      | 74  | 55  | 60  | 50  |
| EGFR(E746-A750del)        | 29  | 90  | 65  | 59  |
| EGFR(G719C)               | 56  | 80  | 82  | 57  |
| EGFR(G719S)               | 63  | 76  | 84  | 53  |
| EGFR(L747-E749del, A750P) | 51  | 38  | 22  | 19  |
| EGFR(L747-S752del, P753S) | 22  | 69  | 78  | 52  |
| EGFR(L747-T751del,Sins)   | 20  | 56  | 45  | 62  |
| EGFR(L858R)               | 100 | 79  | 81  | 82  |
| EGFR(L858R,T790M)         | 84  | 96  | 0   | 9.2 |
| EGFR(L861Q)               | 46  | 72  | 59  | 64  |
| EGFR(S752-I759del)        | 40  | 96  | 53  | 24  |
| EGFR(T790M)               | 72  | 84  | 8.9 | 67  |
| EIF2AK1                   | 85  | 78  | 100 | 100 |
| EPHA1                     | 53  | 93  | 100 | 82  |
| EPHA2                     | 6.7 | 28  | 56  | 64  |
| EPHA3                     | 0.2 | 54  | 52  | 70  |



|                       |     |     |     |     |
|-----------------------|-----|-----|-----|-----|
| EPHA4                 | 16  | 91  | 66  | 60  |
| EPHA5                 | 55  | 80  | 100 | 100 |
| EPHA6                 | 38  | 54  | 87  | 74  |
| EPHA7                 | 94  | 100 | 100 | 100 |
| EPHA8                 | 2.1 | 8.1 | 2.7 | 5   |
| EPHB1                 | 52  | 100 | 100 | 100 |
| EPHB2                 | 21  | 73  | 75  | 94  |
| EPHB3                 | 100 | 94  | 100 | 100 |
| EPHB4                 | 100 | 96  | 100 | 100 |
| EPHB6                 | 70  | 100 | 100 | 89  |
| ERBB2                 | 21  | 58  | 23  | 34  |
| ERBB3                 | 100 | 100 | 86  | 100 |
| ERBB4                 | 45  | 81  | 52  | 84  |
| ERK1                  | 100 | 94  | 100 | 100 |
| ERK2                  | 100 | 89  | 100 | 100 |
| ERK3                  | 100 | 100 | 100 | 100 |
| ERK4                  | 91  | 81  | 100 | 100 |
| ERK5                  | 95  | 81  | 100 | 100 |
| ERK8                  | 96  | 95  | 58  | 99  |
| ERN1                  | 100 | 100 | 100 | 100 |
| FAK                   | 100 | 95  | 81  | 100 |
| FER                   | 100 | 78  | 55  | 100 |
| FES                   | 100 | 100 | 79  | 100 |
| FGFR1                 | 5.2 | 1   | 5.8 | 3.8 |
| FGFR2                 | 21  | 6.8 | 31  | 20  |
| FGFR3                 | 45  | 26  | 62  | 54  |
| FGFR3(G697C)          | 63  | 28  | 75  | 50  |
| FGFR4                 | 38  | 12  | 61  | 12  |
| FGR                   | 11  | 13  | 6.4 | 14  |
| FLT1                  | 25  | 30  | 43  | 13  |
| FLT3                  | 3.8 | 3.5 | 1.8 | 0.8 |
| FLT3(D835H)           | 8.6 | 5.6 | 7.1 | 4.3 |
| FLT3(D835V)           | 22  | 13  | 1.8 | 1.4 |
| FLT3(D835Y)           | 26  | 3.6 | 18  | 18  |
| FLT3(ITD)             | 5.6 | 1.7 | 9   | 4.2 |
| FLT3(ITD,D835V)       | 92  | 100 | 57  | 56  |
| FLT3(ITD,F691L)       | 17  | 29  | 10  | 5.3 |
| FLT3(K663Q)           | 69  | 1.6 | 5.5 | 9.4 |
| FLT3(N841I)           | 0   | 0   | 2.2 | 4.3 |
| FLT3(R834Q)           | 0   | 1.9 | 1.7 | 1.5 |
| FLT3-autoinhibited    | 66  | 66  | 64  | 47  |
| FLT4                  | 18  | 11  | 11  | 5.4 |
| FRK                   | 13  | 15  | 13  | 14  |
| FYN                   | 21  | 26  | 15  | 33  |
| GAK                   | 99  | 92  | 100 | 90  |
| GCN2(Kin.Dom.2,S808G) | 62  | 33  | 86  | 59  |

|                              |     |     |     |     |
|------------------------------|-----|-----|-----|-----|
| GRK1                         | 100 | 73  | 100 | 100 |
| GRK2                         | 100 | 100 | 93  | 77  |
| GRK3                         | 87  | 100 | 60  | 92  |
| GRK4                         | 100 | 85  | 94  | 84  |
| GRK7                         | 100 | 100 | 81  | 83  |
| GSK3A                        | 92  | 92  | 95  | 100 |
| GSK3B                        | 100 | 100 | 100 | 100 |
| HASPIN                       | 65  | 100 | 100 | 94  |
| HCK                          | 3.1 | 6.2 | 6   | 13  |
| HIPK1                        | 100 | 33  | 0.5 | 46  |
| HIPK2                        | 100 | 45  | 0.3 | 89  |
| HIPK3                        | 100 | 28  | 0.5 | 45  |
| HIPK4                        | 70  | 31  | 21  | 26  |
| HPK1                         | 5   | 74  | 3.4 | 84  |
| HUNK                         | 59  | 100 | 100 | 98  |
| ICK                          | 80  | 100 | 42  | 67  |
| IGF1R                        | 100 | 87  | 72  | 100 |
| IKK-alpha                    | 18  | 18  | 1.8 | 6   |
| IKK-beta                     | 27  | 25  | 3.2 | 5.7 |
| IKK-epsilon                  | 100 | 100 | 100 | 98  |
| INSR                         | 96  | 75  | 5.3 | 100 |
| INSRR                        | 100 | 85  | 56  | 100 |
| IRAK1                        | 46  | 34  | 0.3 | 9.4 |
| IRAK3                        | 100 | 81  | 100 | 100 |
| IRAK4                        | 100 | 55  | 16  | 26  |
| ITK                          | 100 | 44  | 4   | 39  |
| JAK1(JH1domain-catalytic)    | 76  | 52  | 61  | 57  |
| JAK1(JH2domain-pseudokinase) | 88  | 100 | 84  | 87  |
| JAK2(JH1domain-catalytic)    | 90  | 37  | 38  | 84  |
| JAK3(JH1domain-catalytic)    | 7.8 | 4.7 | 4.6 | 5.4 |
| JNK1                         | 96  | 88  | 100 | 96  |
| JNK2                         | 54  | 28  | 12  | 25  |
| JNK3                         | 99  | 92  | 79  | 67  |
| KIT                          | 2.2 | 1.1 | 2.2 | 0.5 |
| KIT(A829P)                   | 0.2 | 11  | 7.9 | 6.6 |
| KIT(D816H)                   | 26  | 23  | 19  | 28  |
| KIT(D816V)                   | 63  | 66  | 89  | 45  |
| KIT(L576P)                   | 0   | 0.8 | 0   | 0   |
| KIT(V559D)                   | 0.8 | 1.2 | 1   | 0.5 |
| KIT(V559D,T670I)             | 2.5 | 1.6 | 1.8 | 1   |
| KIT(V559D,V654A)             | 30  | 22  | 21  | 8.7 |
| KIT-autoinhibited            | 88  | 100 | 100 | 100 |
| LATS1                        | 100 | 73  | 100 | 100 |
| LATS2                        | 100 | 100 | 85  | 100 |
| LCK                          | 1   | 0.8 | 0.9 | 1.1 |
| LIMK1                        | 100 | 72  | 100 | 100 |

|               |     |     |     |     |
|---------------|-----|-----|-----|-----|
| LIMK2         | 100 | 100 | 100 | 74  |
| LKB1          | 100 | 100 | 100 | 100 |
| LOK           | 0.2 | 0.1 | 0.1 | 0   |
| LRRK2         | 90  | 58  | 100 | 75  |
| LRRK2(G2019S) | 79  | 96  | 100 | 100 |
| LTK           | 9.1 | 75  | 80  | 100 |
| LYN           | 4.7 | 9.7 | 17  | 17  |
| LZK           | 79  | 90  | 52  | 81  |
| MAK           | 100 | 49  | 62  | 100 |
| MAP3K1        | 100 | 92  | 93  | 100 |
| MAP3K15       | 100 | 45  | 56  | 58  |
| MAP3K2        | 49  | 44  | 13  | 89  |
| MAP3K3        | 28  | 8.2 | 1.6 | 22  |
| MAP3K4        | 100 | 100 | 99  | 100 |
| MAP4K2        | 2.4 | 71  | 0.6 | 70  |
| MAP4K3        | 98  | 93  | 34  | 100 |
| MAP4K4        | 20  | 65  | 22  | 68  |
| MAP4K5        | 56  | 100 | 76  | 75  |
| MAPKAPK2      | 100 | 100 | 91  | 100 |
| MAPKAPK5      | 100 | 100 | 91  | 90  |
| MARK1         | 100 | 100 | 58  | 76  |
| MARK2         | 89  | 89  | 75  | 100 |
| MARK3         | 100 | 91  | 100 | 100 |
| MARK4         | 100 | 72  | 82  | 99  |
| MAST1         | 74  | 74  | 100 | 87  |
| MEK1          | 98  | 100 | 100 | 100 |
| MEK2          | 100 | 100 | 100 | 100 |
| MEK3          | 96  | 100 | 100 | 97  |
| MEK4          | 100 | 100 | 100 | 100 |
| MEK5          | 3.5 | 2.3 | 7.9 | 13  |
| MEK6          | 100 | 100 | 87  | 95  |
| MELK          | 100 | 34  | 70  | 28  |
| MERTK         | 73  | 16  | 9.8 | 26  |
| MET           | 91  | 97  | 100 | 100 |
| MET(M1250T)   | 98  | 92  | 88  | 100 |
| MET(Y1235D)   | 100 | 100 | 100 | 100 |
| MINK          | 53  | 75  | 10  | 100 |
| MKK7          | 100 | 91  | 100 | 95  |
| MKNK1         | 87  | 3.6 | 34  | 5.8 |
| MKNK2         | 21  | 0.4 | 3.3 | 1.6 |
| MLCK          | 100 | 100 | 97  | 100 |
| MLK1          | 100 | 94  | 87  | 100 |
| MLK2          | 93  | 36  | 42  | 66  |
| MLK3          | 100 | 87  | 76  | 100 |
| MRCKA         | 100 | 69  | 100 | 100 |
| MRCKB         | 100 | 100 | 100 | 100 |

|                       |     |     |     |     |
|-----------------------|-----|-----|-----|-----|
| MST1                  | 100 | 84  | 19  | 100 |
| MST1R                 | 100 | 87  | 100 | 100 |
| MST2                  | 89  | 100 | 60  | 100 |
| MST3                  | 100 | 83  | 49  | 100 |
| MST4                  | 65  | 100 | 25  | 18  |
| MTOR                  | 100 | 100 | 100 | 99  |
| MUSK                  | 6.7 | 2.3 | 12  | 3   |
| MYLK                  | 100 | 100 | 100 | 100 |
| MYLK2                 | 100 | 45  | 87  | 65  |
| MYLK4                 | 100 | 74  | 100 | 95  |
| MYO3A                 | 93  | 59  | 39  | 100 |
| MYO3B                 | 94  | 52  | 100 | 100 |
| NDR1                  | 100 | 96  | 78  | 100 |
| NDR2                  | 100 | 86  | 93  | 95  |
| NEK1                  | 100 | 100 | 95  | 100 |
| NEK10                 | 98  | 95  | 57  | 100 |
| NEK11                 | 95  | 92  | 38  | 100 |
| NEK2                  | 100 | 92  | 100 | 100 |
| NEK3                  | 72  | 100 | 92  | 78  |
| NEK4                  | 78  | 98  | 61  | 58  |
| NEK5                  | 98  | 70  | 100 | 100 |
| NEK6                  | 100 | 91  | 100 | 100 |
| NEK7                  | 100 | 100 | 100 | 100 |
| NEK9                  | 100 | 59  | 41  | 33  |
| NIK                   | 100 | 100 | 85  | 100 |
| NIM1                  | 86  | 100 | 95  | 99  |
| NLK                   | 42  | 55  | 100 | 100 |
| OSR1                  | 100 | 90  | 81  | 100 |
| p38-alpha             | 40  | 27  | 11  | 30  |
| p38-beta              | 43  | 56  | 79  | 74  |
| p38-delta             | 100 | 65  | 3.9 | 100 |
| p38-gamma             | 71  | 75  | 1.4 | 74  |
| PAK1                  | 100 | 77  | 90  | 100 |
| PAK2                  | 100 | 71  | 94  | 94  |
| PAK3                  | 5.6 | 100 | 40  | 39  |
| PAK4                  | 100 | 90  | 97  | 96  |
| PAK6                  | 100 | 87  | 100 | 76  |
| PAK7                  | 100 | 94  | 91  | 96  |
| PCKT1                 | 90  | 29  | 21  | 87  |
| PCKT2                 | 52  | 35  | 26  | 100 |
| PCKT3                 | 71  | 61  | 35  | 100 |
| PDGFRA                | 4.6 | 2.9 | 0.8 | 1.1 |
| PDGFRB                | 0.7 | 0.6 | 0.6 | 0.2 |
| PDPK1                 | 94  | 80  | 75  | 87  |
| PFCDPK1(P.falciparum) | 15  | 74  | 7.9 | 100 |
| PFPK5(P.falciparum)   | 66  | 100 | 88  | 90  |

|                      |     |     |     |     |
|----------------------|-----|-----|-----|-----|
| PFTAIRE2             | 79  | 30  | 22  | 60  |
| PFTK1                | 46  | 9.7 | 6.7 | 88  |
| PHKG1                | 100 | 100 | 93  | 100 |
| PHKG2                | 100 | 84  | 100 | 100 |
| PIK3C2B              | 97  | 100 | 83  | 88  |
| PIK3C2G              | 100 | 100 | 92  | 90  |
| PIK3CA               | 91  | 90  | 95  | 100 |
| PIK3CA(C420R)        | 100 | 98  | 91  | 100 |
| PIK3CA(E542K)        | 96  | 93  | 95  | 76  |
| PIK3CA(E545A)        | 100 | 88  | 100 | 100 |
| PIK3CA(E545K)        | 93  | 99  | 100 | 81  |
| PIK3CA(H1047L)       | 100 | 100 | 100 | 100 |
| PIK3CA(H1047Y)       | 85  | 100 | 86  | 86  |
| PIK3CA(I800L)        | 89  | 89  | 100 | 81  |
| PIK3CA(M1043I)       | 95  | 100 | 86  | 100 |
| PIK3CA(Q546K)        | 70  | 90  | 84  | 87  |
| PIK3CB               | 100 | 100 | 84  | 100 |
| PIK3CD               | 97  | 88  | 100 | 88  |
| PIK3CG               | 96  | 100 | 75  | 81  |
| PIK4CB               | 82  | 100 | 73  | 69  |
| PIKFYVE              | 100 | 100 | 100 | 94  |
| PIM1                 | 100 | 90  | 96  | 100 |
| PIM2                 | 100 | 100 | 100 | 100 |
| PIM3                 | 100 | 92  | 87  | 97  |
| PIP5K1A              | 100 | 73  | 100 | 88  |
| PIP5K1C              | 79  | 100 | 92  | 97  |
| PIP5K2B              | 100 | 86  | 100 | 100 |
| PIP5K2C              | 95  | 100 | 100 | 100 |
| PKAC-alpha           | 74  | 100 | 92  | 89  |
| PKAC-beta            | 35  | 100 | 97  | 100 |
| PKMYT1               | 100 | 97  | 100 | 94  |
| PKN1                 | 100 | 91  | 94  | 100 |
| PKN2                 | 100 | 75  | 72  | 100 |
| PKNB(M.tuberculosis) | 95  | 83  | 100 | 100 |
| PLK1                 | 80  | 94  | 81  | 81  |
| PLK2                 | 100 | 100 | 100 | 100 |
| PLK3                 | 100 | 100 | 92  | 100 |
| PLK4                 | 100 | 83  | 80  | 100 |
| PRKCD                | 76  | 66  | 71  | 82  |
| PRKCE                | 59  | 87  | 90  | 100 |
| PRKCH                | 86  | 76  | 85  | 98  |
| PRKCI                | 100 | 71  | 91  | 85  |
| PRKCQ                | 100 | 89  | 100 | 98  |
| PRKD1                | 100 | 100 | 100 | 100 |
| PRKD2                | 100 | 28  | 92  | 100 |
| PRKD3                | 100 | 80  | 92  | 97  |

|                               |            |            |            |          |
|-------------------------------|------------|------------|------------|----------|
| PRKG1                         | 100        | 66         | 100        | 100      |
| PRKG2                         | 100        | 94         | 91         | 86       |
| PRKR                          | 100        | 78         | 85         | 86       |
| PRKX                          | 100        | 99         | 76         | 92       |
| PRP4                          | 88         | 99         | 100        | 100      |
| PYK2                          | 55         | 85         | 4.1        | 70       |
| QSK                           | 83         | 95         | 100        | 100      |
| RAF1                          | 23         | 64         | 57         | 10       |
| <b>RET</b>                    | <b>0.4</b> | <b>0.1</b> | <b>0.1</b> | <b>0</b> |
| RET(M918T)                    | 0.8        | 0          | 0.1        | 0.1      |
| RET(V804L)                    | 8          | 2.3        | 0.9        | 1        |
| RET(V804M)                    | 4.4        | 3          | 0.3        | 0.5      |
| RIOK1                         | 98         | 100        | 86         | 73       |
| RIOK2                         | 96         | 73         | 100        | 30       |
| RIOK3                         | 56         | 100        | 73         | 54       |
| RIPK1                         | 60         | 76         | 81         | 52       |
| RIPK2                         | 32         | 73         | 44         | 56       |
| RIPK4                         | 77         | 82         | 9.2        | 74       |
| RIPK5                         | 100        | 89         | 8.6        | 95       |
| ROCK1                         | 100        | 98         | 85         | 100      |
| ROCK2                         | 99         | 98         | 25         | 72       |
| ROS1                          | 100        | 83         | 35         | 100      |
| RPS6KA4(Kin.Dom.1-N-terminal) | 88         | 74         | 100        | 100      |
| RPS6KA4(Kin.Dom.2-C-terminal) | 100        | 100        | 94         | 91       |
| RPS6KA5(Kin.Dom.1-N-terminal) | 100        | 53         | 81         | 83       |
| RPS6KA5(Kin.Dom.2-C-terminal) | 100        | 100        | 100        | 100      |
| RSK1(Kin.Dom.1-N-terminal)    | 100        | 76         | 76         | 79       |
| RSK1(Kin.Dom.2-C-terminal)    | 100        | 94         | 74         | 90       |
| RSK2(Kin.Dom.1-N-terminal)    | 97         | 43         | 62         | 56       |
| RSK2(Kin.Dom.2-C-terminal)    | 74         | 100        | 100        | 100      |
| RSK3(Kin.Dom.1-N-terminal)    | 100        | 53         | 75         | 71       |
| RSK3(Kin.Dom.2-C-terminal)    | 100        | 72         | 57         | 98       |
| RSK4(Kin.Dom.1-N-terminal)    | 100        | 69         | 87         | 89       |
| RSK4(Kin.Dom.2-C-terminal)    | 100        | 72         | 83         | 100      |
| S6K1                          | 63         | 43         | 10         | 42       |
| SBK1                          | 100        | 90         | 100        | 100      |
| SGK                           | 99         | 100        | 100        | 68       |
| SgK110                        | 100        | 69         | 100        | 100      |
| SGK2                          | 100        | 100        | 100        | 100      |
| SGK3                          | 100        | 94         | 70         | 67       |
| SIK                           | 28         | 85         | 83         | 22       |
| SIK2                          | 81         | 47         | 81         | 23       |
| SLK                           | 9.9        | 23         | 18         | 42       |
| SNARK                         | 100        | 100        | 82         | 100      |
| SNRK                          | 95         | 82         | 94         | 88       |
| SRC                           | 9.1        | 19         | 32         | 33       |

|                              |     |     |     |     |
|------------------------------|-----|-----|-----|-----|
| SRMS                         | 28  | 73  | 28  | 80  |
| SRPK1                        | 91  | 100 | 81  | 100 |
| SRPK2                        | 100 | 100 | 89  | 100 |
| SRPK3                        | 97  | 100 | 95  | 86  |
| STK16                        | 100 | 89  | 90  | 100 |
| STK33                        | 92  | 72  | 58  | 43  |
| STK35                        | 100 | 100 | 91  | 100 |
| STK36                        | 100 | 100 | 100 | 100 |
| STK39                        | 84  | 58  | 79  | 78  |
| SYK                          | 93  | 55  | 47  | 66  |
| TAK1                         | 2.1 | 0.3 | 1.1 | 5.4 |
| TAOK1                        | 50  | 49  | 80  | 65  |
| TAOK2                        | 54  | 69  | 80  | 72  |
| TAOK3                        | 14  | 13  | 56  | 34  |
| TBK1                         | 100 | 100 | 89  | 94  |
| TEC                          | 100 | 100 | 94  | 90  |
| TESK1                        | 100 | 87  | 87  | 100 |
| TGFBR1                       | 100 | 94  | 100 | 100 |
| TGFBR2                       | 63  | 85  | 90  | 100 |
| TIE1                         | 7   | 11  | 9.3 | 15  |
| TIE2                         | 1.5 | 0.8 | 1.8 | 0.7 |
| TLK1                         | 100 | 62  | 88  | 100 |
| TLK2                         | 100 | 100 | 72  | 66  |
| TNIK                         | 15  | 44  | 34  | 91  |
| TNK1                         | 10  | 9.2 | 16  | 20  |
| TNK2                         | 100 | 86  | 100 | 100 |
| TNNI3K                       | 34  | 72  | 37  | 60  |
| TRKA                         | 2.4 | 0.3 | 0   | 0   |
| TRKB                         | 1.5 | 0.1 | 0.1 | 0.2 |
| TRKC                         | 13  | 0.7 | 0.1 | 0.5 |
| TRPM6                        | 100 | 100 | 94  | 100 |
| TSSK1B                       | 100 | 100 | 55  | 71  |
| TSSK3                        | 100 | 100 | 100 | 91  |
| TTK                          | 100 | 65  | 64  | 100 |
| TXK                          | 20  | 82  | 73  | 79  |
| TYK2(JH1domain-catalytic)    | 83  | 63  | 90  | 100 |
| TYK2(JH2domain-pseudokinase) | 100 | 100 | 99  | 100 |
| TYRO3                        | 100 | 63  | 100 | 100 |
| ULK1                         | 100 | 94  | 100 | 100 |
| ULK2                         | 100 | 100 | 100 | 100 |
| ULK3                         | 64  | 45  | 7.3 | 83  |
| VEGFR2                       | 6.9 | 7.2 | 5.8 | 7.9 |
| VPS34                        | 98  | 87  | 100 | 100 |
| VRK2                         | 98  | 90  | 100 | 100 |
| WEE1                         | 100 | 100 | 100 | 84  |
| WEE2                         | 100 | 95  | 100 | 71  |

|       |     |     |     |     |
|-------|-----|-----|-----|-----|
| WNK1  | 100 | 100 | 82  | 100 |
| WNK2  | 98  | 83  | 100 | 100 |
| WNK3  | 96  | 100 | 100 | 100 |
| WNK4  | 100 | 100 | 100 | 100 |
| YANK1 | 92  | 87  | 100 | 100 |
| YANK2 | 92  | 57  | 86  | 99  |
| YANK3 | 100 | 100 | 80  | 75  |
| YES   | 29  | 13  | 28  | 26  |
| YSK1  | 100 | 100 | 97  | 100 |
| YSK4  | 74  | 26  | 1.9 | 28  |
| ZAK   | 1.9 | 3.2 | 22  | 2.2 |
| ZAP70 | 98  | 84  | 78  | 90  |

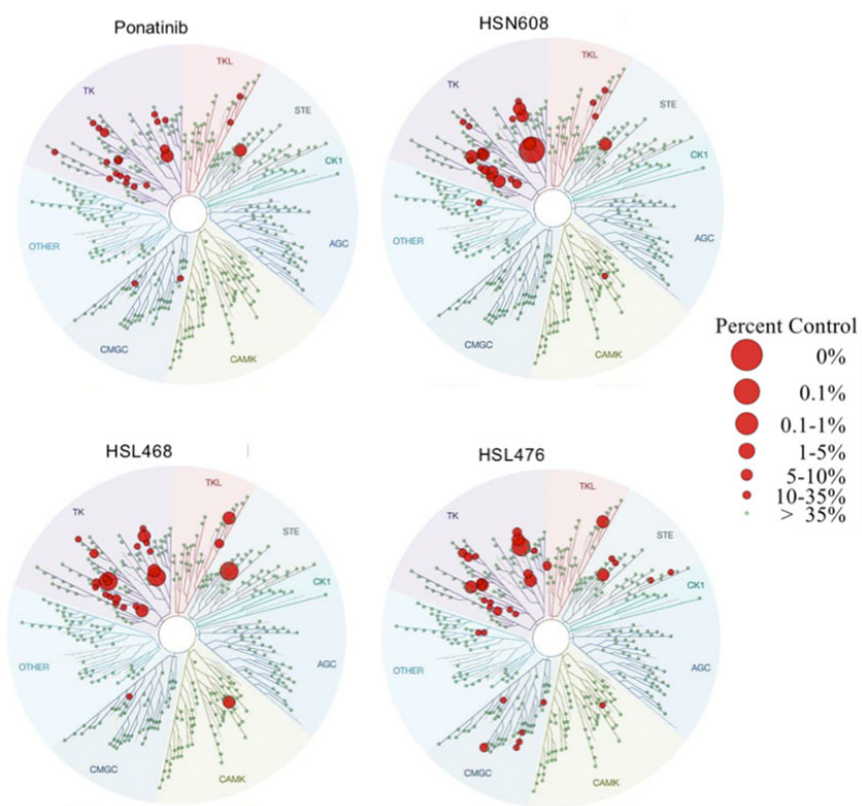

**Fig. S3.** TREESpot™ interaction map for compounds at 10 nM



**Table S4.** Metabolic stability in liver microsomes of alkynyl nicotinamides

| <b>Compound</b> | <b>Species</b> | <b>T<sub>1/2</sub> (h)</b> | <b>CL<sub>int</sub><br/>(<math>\mu\text{L}/\text{min}/\text{mg}</math>)</b> | <b>Scaled CL<sub>int</sub><br/>(<math>\text{mL}/\text{min}/\text{kg}</math>)</b> |
|-----------------|----------------|----------------------------|-----------------------------------------------------------------------------|----------------------------------------------------------------------------------|
| HSN608          | Rat            | 2.15                       | 5.36                                                                        | 25.09                                                                            |
|                 | Dog            | 1.38                       | 8.34                                                                        | 48.44                                                                            |
|                 | Human          | 3.18                       | 3.63                                                                        | 8.99                                                                             |
| HSL476          | Rat            | 1.91                       | 12.08                                                                       | 29.47                                                                            |
|                 | Dog            | 0.37                       | 62.97                                                                       | 110.83                                                                           |
|                 | Human          | 0.86                       | 26.84                                                                       | 27.6                                                                             |
| HSL468          | Rat            | 1.05                       | 22.11                                                                       | 53.95                                                                            |
|                 | Dog            | 0.56                       | 41.31                                                                       | 72.71                                                                            |
|                 | Human          | 0.55                       | 41.95                                                                       | 43.13                                                                            |

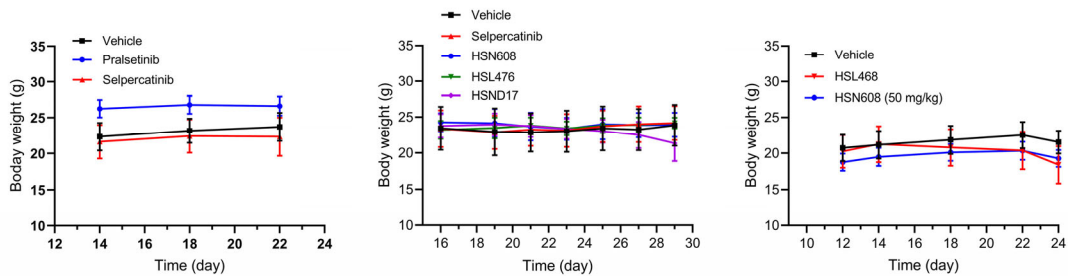

**Fig. S4.** Body weight monitoring of mice during tumor treatment with RET TKIs. Animal body weights were measured with a scale on the indicated days (see **Fig. 4A** for information on the start and end days of drug treatment). The average body weights from each group of mice are shown.
